# Supplementary material for: Hypericum Genus as a Natural Source for Biologically Active Compounds
Source: MDPI journal article supplement (doi:10.3390/plants11192509), 2022-09-26
Supplement: s1 [file s1]

**Table S1.** Biological activity of secondary metabolites identified in *Hypericum* genus plants

| Compound Class     | Compound       | Measurement    | Method                    | Outcome                                                          | Therapeutic Application                                                  | Species, Plant Part and Extract | Ref #                                    |      |
|--------------------|----------------|----------------|---------------------------|------------------------------------------------------------------|--------------------------------------------------------------------------|---------------------------------|------------------------------------------|------|
| Acylphloroglucinol | Hyperacmosin A | Cell viability | In vitro SK-N-SH cells    | Increased cell viability                                         | Survival rate: 68.20% vs 62.10 donepezil control vs 63.20 % PHPB control | CP                              | Hypericum acmosepalum N.Robson, AP, EtOH | [33] |
| Acylphloroglucinol | Sampsonione J  | Cell viability | In vitro HepG2 cell lines | Increased cell viability<br>Decreased paracetamol induced damage | 64.37% vs 60.12% bicyclol control                                        | CP                              | Hypericum acmosepalum N.Robson, AP, EtOH | [34] |
| Acylphloroglucinol | Sampsonione C  | Cell viability | In vitro HepG2 cell lines | Increased cell viability<br>Decreased paracetamol induced damage | 61.62% vs 60.12% bicyclol control                                        | CP                              | Hypericum acmosepalum N.Robson, AP, EtOH | [34] |
| Acylphloroglucinol | Hyperacmosin H | Cell viability | In vitro HepG2 cell lines | Increased cell viability<br>Decreased paracetamol induced damage | 60.38% vs 60.12% bicyclol control                                        | CP                              | Hypericum acmosepalum N.Robson, AP, EtOH | [35] |
| Acylphloroglucinol | Hyperascyrin B | Cell viability | In vitro HepG2 cell lines | Increased cell viability<br>Decreased paracetamol induced damage | 61.56% vs 60.12% bicyclol control                                        | CP                              | Hypericum acmosepalum N.Robson, AP, EtOH | [35] |

| Compound Class            | Compound         | Measurement    | Method                                                       |                                                      | Outcome                                                                                                                                                                          | Therapeutic Application | Species, Plant Part and Extract                        | Ref # |
|---------------------------|------------------|----------------|--------------------------------------------------------------|------------------------------------------------------|----------------------------------------------------------------------------------------------------------------------------------------------------------------------------------|-------------------------|--------------------------------------------------------|-------|
| <b>Acylphloroglucinol</b> | Hyperacmosin C   | Cell viability | <i>In vitro</i> HepG2 paracetamol induced cell damage        | <b>Increased</b> cell viability                      | <b>Decreased</b> paracetamol induced cell damage                                                                                                                                 | CP                      | <i>Hypericum acmosepalum</i><br>N.Robson, AP, EtOH     | [36]  |
| <b>Acylphloroglucinol</b> | Hyperannulatin A | Cell viability | <i>In vitro</i> HL-60, HL-60/DOX, MDA-MB, SKW-3, K-562 cells | <b>Decreased</b> cell viability (Selective activity) | IC <sub>50</sub> = 5.87 - 3.42 $\mu$ M vs<br>IC <sub>50</sub> = 42.34 - 1.27 $\mu$ M<br>Etoposide control<br>IC <sub>50</sub> = 0.64 - 0.11 $\mu$ M<br>Podophyllotoxin control   | AC                      | <i>Hypericum afromontanum</i><br>Bullock, AP, n-Hexane | [37]  |
| <b>Acylphloroglucinol</b> | Hyperannulatin B | Cell viability | <i>In vitro</i> HL-60, HL-60/DOX, MDA-MB, SKW-3, K-562 cells | <b>Decreased</b> cell viability (Selective activity) | IC <sub>50</sub> = 31.09 - 1.48 $\mu$ M vs<br>IC <sub>50</sub> = 42.34 - 1.27 $\mu$ M<br>Etoposide control<br>IC <sub>50</sub> = 0.64 - 0.11 $\mu$ M<br>Podophyllotoxin control  | AC                      | <i>Hypericum afromontanum</i><br>Bullock, AP, n-Hexane | [37]  |
| <b>Acylphloroglucinol</b> | Hyperannulatin C | Cell viability | <i>In vitro</i> HL-60, HL-60/DOX, MDA-MB, SKW-3, K-562 cells | <b>Decreased</b> cell viability (Selective activity) | IC <sub>50</sub> = 81.29 - 4.67 $\mu$ M vs<br>IC <sub>50</sub> = 42.34 - 1.27 $\mu$ M<br>Etoposide control<br>IC <sub>50</sub> = 0.64 - 0.11 $\mu$ M<br>Podophyllotoxin control  | AC                      | <i>Hypericum afromontanum</i><br>Bullock, AP, n-Hexane | [37]  |
| <b>Acylphloroglucinol</b> | Hyperannulatin D | Cell viability | <i>In vitro</i> HL-60, HL-60/DOX, MDA-MB, SKW-3, K-562 cells | <b>Decreased</b> cell viability (Selective activity) | IC <sub>50</sub> = 36.35 - 14.36 $\mu$ M vs<br>IC <sub>50</sub> = 42.34 - 1.27 $\mu$ M<br>Etoposide control<br>IC <sub>50</sub> = 0.64 - 0.11 $\mu$ M<br>Podophyllotoxin control | AC                      | <i>Hypericum afromontanum</i><br>Bullock, AP, n-Hexane | [37]  |

| Compound Class     | Compound         | Measurement                          | Method                                                   | Outcome                                                                                                     | Therapeutic Application                                                                                                                                          | Species, Plant Part and Extract | Ref #                                           |      |
|--------------------|------------------|--------------------------------------|----------------------------------------------------------|-------------------------------------------------------------------------------------------------------------|------------------------------------------------------------------------------------------------------------------------------------------------------------------|---------------------------------|-------------------------------------------------|------|
| Acylphloroglucinol | Hyperannulatin E | Cell viability                       | In vitro<br>HL-60, HL-60/DOX, MDA-MB, SKW-3, K-562 cells | Decreased cell viability (Selective activity)                                                               | IC <sub>50</sub> = 13.44 - 2.85 μM vs<br>IC <sub>50</sub> = 42.34 - 1.27 μM<br>Etoposide control<br>IC <sub>50</sub> = 0.64 - 0.11 μM<br>Podophyllotoxin control | AC                              | Hypericum afromontanum<br>Bullock, AP, n-Hexane | [37] |
| Acylphloroglucinol | Andinin A        | Stress-induced depressive behaviours | In vivo mouse model                                      | Decreased immobility time in FST                                                                            |                                                                                                                                                                  | AD                              | Hypericum andinum<br>Gleason, R, n-Hexane       | [38] |
| Acylphloroglucinol | Hyperascyrin L   | Cell viability                       | In vitro<br>SK-N-SH, HepG2 cells                         | Neuroprotective<br>Increased: SK-N-SH cell viability<br>Hepatoprotective<br>Increased: HepG2 cell viability | Neuroprotective: significant neuroprotection vs resveratrol positive control<br>Hepatoprotective: significant hepatoprotection vs bicyclol positive control      | CP                              | Hypericum ascyron L., AP, EtOH                  | [39] |
| Acylphloroglucinol | Hyperascyrin M   | Cell viability                       | In vitro<br>SK-N-SH and HepG2 cells                      | Neuroprotective<br>Increased: SK-N-SH cell viability<br>Hepatoprotective<br>Increased: HepG2 cell viability | Neuroprotective: significant neuroprotection vs resveratrol positive control<br>Hepatoprotective: significant hepatoprotection vs bicyclol positive control      | CP                              | Hypericum ascyron L., AP, EtOH                  | [39] |

| Compound Class            | Compound       | Measurement              | Method                                                                                           |                                                                                                                                         | Outcome                                                                                                                                                                   | Therapeutic Application | Species, Plant Part and Extract       | Ref # |
|---------------------------|----------------|--------------------------|--------------------------------------------------------------------------------------------------|-----------------------------------------------------------------------------------------------------------------------------------------|---------------------------------------------------------------------------------------------------------------------------------------------------------------------------|-------------------------|---------------------------------------|-------|
| <b>Acylphloroglucinol</b> | Hyperascyrin N | Cell viability           | <i>In vitro</i><br>SK-N-SH and HepG2 cells                                                       | <u>Neuroprotective</u><br><b>Increased:</b> SK-N-SH cell viability<br><u>Hepatoprotective</u><br><b>Increased:</b> HepG2 cell viability | <b>Neuroprotective:</b> significant neuroprotection vs resveratrol positive control<br><b>Hepatoprotective:</b> significant hepatoprotection vs bicyclol positive control | CP                      | <i>Hypericum ascyron</i> L., AP, EtOH | [39]  |
| <b>Acylphloroglucinol</b> | Hypascyrin A   | Bacterial susceptibility | <i>In vitro</i><br>Methicillin-resistant <i>Staphylococcus aureus</i> , <i>Bacillus subtilis</i> | Active against <i>S. aureus</i> , <i>B. subtilis</i>                                                                                    | MIC= 4.0 $\mu$ M <i>S. aureus</i><br>MIC= 4.0 $\mu$ M <i>B. subtilis</i>                                                                                                  | AM                      | <i>Hypericum ascyron</i> L., R, MeOH  | [40]  |
| <b>Acylphloroglucinol</b> | Hypascyrin C   | Bacterial susceptibility | <i>In vitro</i><br>Methicillin-resistant <i>Staphylococcus aureus</i> , <i>Bacillus subtilis</i> | Active against <i>S. aureus</i> , <i>B. subtilis</i>                                                                                    | MIC= 8.0 $\mu$ M <i>S. aureus</i><br>MIC= 4.0 $\mu$ M <i>B. subtilis</i>                                                                                                  | AM                      | <i>Hypericum ascyron</i> L., R, MeOH  | [40]  |
| <b>Acylphloroglucinol</b> | Hypascyrin E   | Bacterial susceptibility | <i>In vitro</i><br>Methicillin-resistant <i>Staphylococcus aureus</i> , <i>Bacillus subtilis</i> | Active against <i>S. aureus</i> , <i>B. subtilis</i>                                                                                    | MIC= 2.0 $\mu$ M <i>S. aureus</i><br>MIC= 2.0 $\mu$ M <i>B. subtilis</i>                                                                                                  | AM                      | <i>Hypericum ascyron</i> L., R, MeOH  | [40]  |
| <b>Acylphloroglucinol</b> | Hyphenrone J   | Bacterial susceptibility | <i>In vitro</i><br>Methicillin-resistant <i>Staphylococcus aureus</i> , <i>Bacillus subtilis</i> | Active against <i>S. aureus</i> , <i>B. subtilis</i>                                                                                    | MIC= 4.0 $\mu$ M <i>S. aureus</i><br>MIC= 4.0 $\mu$ M <i>B. subtilis</i>                                                                                                  | AM                      | <i>Hypericum ascyron</i> L., R, MeOH  | [40]  |

| Compound Class            | Compound        | Measurement              | Method                                                                                        |                                                      | Outcome                                                                                                                                                       | Therapeutic Application | Species, Plant Part and Extract       | Ref # |
|---------------------------|-----------------|--------------------------|-----------------------------------------------------------------------------------------------|------------------------------------------------------|---------------------------------------------------------------------------------------------------------------------------------------------------------------|-------------------------|---------------------------------------|-------|
| <b>Acylphloroglucinol</b> | Hyphenrone K    | Bacterial susceptibility | <i>In vitro</i> Methicillin-resistant <i>Staphylococcus aureus</i> , <i>Bacillus subtilis</i> | Active against <i>S. aureus</i> , <i>B. subtilis</i> | MIC= 4.0 $\mu$ M <i>S. aureus</i><br>MIC= 1.0 $\mu$ M <i>B. subtilis</i>                                                                                      | AM                      | <i>Hypericum ascyron</i> L., R, MeOH  | [40]  |
| <b>Acylphloroglucinol</b> | Norascyronone A | Cell viability           | <i>In vitro</i> PANC-1, SK-BR-3 cells                                                         | <b>Decreased</b> cell viability                      | IC <sub>50</sub> = 4.3 $\mu$ M against SK-BR-3<br>IC <sub>50</sub> = 8.4 $\mu$ M against PANC-1 vs taxinol                                                    | AC                      | <i>Hypericum ascyron</i> L., AP, MeOH | [41]  |
| <b>Acylphloroglucinol</b> | Norascyronone B | Cell viability           | <i>In vitro</i> ECA-109, SK-BR-3 cells                                                        | <b>Decreased</b> cell viability                      | IC <sub>50</sub> = 7.8 $\mu$ M against SK-BR-3<br>IC <sub>50</sub> = 12.7 $\mu$ M against ECA-109 vs taxinol                                                  | AC                      | <i>Hypericum ascyron</i> L., AP, MeOH | [41]  |
| <b>Acylphloroglucinol</b> | Hyperascyryn A  | Cell viability           | <i>In vitro</i> SK-N-SH cells                                                                 | <b>Increased</b> cell viability                      | SK-N-SH Cell viability 82.9 $\pm$ 8.7 % vs 82.5 $\pm$ 1.2 % resveratrol control                                                                               | CP                      | <i>Hypericum ascyron</i> L., AP, EtOH | [42]  |
| <b>Acylphloroglucinol</b> | Hyperascyryn H  | Cell viability           | <i>In vitro</i> SK-N-SH, HeG2 cells                                                           | <b>Increased</b> cell viability                      | SK-N-SH Cell viability 78.2 $\pm$ 0.5 % vs 82.5 $\pm$ 1.2 % resveratrol control<br>HepG2 Cell viability 50.3 $\pm$ 1.3 % vs 45.6 $\pm$ 0.4 % bicyclol control | CP                      | <i>Hypericum ascyron</i> L., AP, EtOH | [42]  |
| <b>Acylphloroglucinol</b> | Hyperascyryn I  | Cell viability           | <i>In vitro</i> HepG2 cells                                                                   | <b>Increased</b> cell viability                      | HepG2 Cell viability 51.2 $\pm$ 1.4 % vs 45.6 $\pm$ 0.4 % bicyclol control                                                                                    | CP                      | <i>Hypericum ascyron</i> L., AP, EtOH | [42]  |

| Compound Class            | Compound       | Measurement    | Method                                                          |                                                      | Outcome                                                                                                             | Therapeutic Application | Species, Plant Part and Extract                           | Ref # |
|---------------------------|----------------|----------------|-----------------------------------------------------------------|------------------------------------------------------|---------------------------------------------------------------------------------------------------------------------|-------------------------|-----------------------------------------------------------|-------|
| <b>Acylphloroglucinol</b> | Hyperattenin A | Cell viability | <i>In vitro</i><br>HL-60, SMMC-7721, A-549, MCF-7, SW-480 cells | <b>Decreased</b> cell viability (selective activity) | IC <sub>50</sub> = 28.96 - 9.62μM vs 15.23 - 2.12μM<br>Cysplatin control vs <0.008 - <0.00μM<br>Paclitaxel control  | AC                      | <i>Hypericum attenuatum</i><br>Fisch. ex Choisy, AP, EtOH | [43]  |
| <b>Acylphloroglucinol</b> | Hyperattenin B | Cell viability | <i>In vitro</i><br>HL-60, SMMC-7721, A-549, MCF-7 cells         | <b>Decreased</b> cell viability (selective activity) | IC <sub>50</sub> = 23.15 - 15.26μM vs 15.23 - 2.12μM<br>Cysplatin control vs <0.008 - <0.00μM<br>Paclitaxel control | AC                      | <i>Hypericum attenuatum</i><br>Fisch. ex Choisy, AP, EtOH | [43]  |
| <b>Acylphloroglucinol</b> | Hyperattenin C | Cell viability | <i>In vitro</i><br>HL-60, SMMC-7721, A-549, MCF-7 cells         | <b>Decreased</b> cell viability (selective activity) | IC <sub>50</sub> = 35.34 - 16.20μM vs 15.23 - 2.12μM<br>Cysplatin control vs <0.008 - <0.00μM<br>Paclitaxel control | AC                      | <i>Hypericum attenuatum</i><br>Fisch. ex Choisy, AP, EtOH | [43]  |
| <b>Acylphloroglucinol</b> | Hyperattenin D | Cell viability | <i>In vitro</i><br>SMMC-7721, A-549, MCF-7 cells                | <b>Decreased</b> cell viability (selective activity) | IC <sub>50</sub> = 30.36 - 19.31μM vs 15.23 - 7.47μM<br>Cysplatin control vs <0.008 - <0.00μM<br>Paclitaxel control | AC                      | <i>Hypericum attenuatum</i><br>Fisch. ex Choisy, AP, EtOH | [43]  |
| <b>Acylphloroglucinol</b> | Hyperattenin E | Cell viability | <i>In vitro</i><br>HL-60, A-549, MCF-7 cells                    | <b>Decreased</b> cell viability (selective activity) | IC <sub>50</sub> = 31.6 - 30.89μM vs 15.23 - 2.12μM<br>Cysplatin control vs <0.00μM<br>Paclitaxel control           | AC                      | <i>Hypericum attenuatum</i><br>Fisch. ex Choisy, AP, EtOH | [43]  |
| <b>Acylphloroglucinol</b> | Hyperattenin H | Cell viability | <i>In vitro</i><br>SMMC-7721 cells                              | <b>Decreased</b> cell viability (selective activity) | IC <sub>50</sub> = 20.51μM vs 7.47μM<br>Cysplatin control vs <0.008μM<br>Paclitaxel control                         | AC                      | <i>Hypericum attenuatum</i><br>Fisch. ex Choisy, AP, EtOH | [43]  |

| Compound Class            | Compound       | Measurement                      | Method                                                          |                                                                                                     | Outcome                                                                                                                                                                                              | Therapeutic Application | Species, Plant Part and Extract                        | Ref # |
|---------------------------|----------------|----------------------------------|-----------------------------------------------------------------|-----------------------------------------------------------------------------------------------------|------------------------------------------------------------------------------------------------------------------------------------------------------------------------------------------------------|-------------------------|--------------------------------------------------------|-------|
| <b>Acylphloroglucinol</b> | Hyperattenin I | Cell viability                   | <i>In vitro</i><br>HL-60, SMMC-7721, A-549, MCF-7, SW-480 cells | <b>Decreased</b> cell viability (selective activity)                                                | IC <sub>50</sub> = 15.88 - 2.04 μM vs 15.23 - 2.12 μM<br>Cysplatin control vs <0.008 - <0.00 μM<br>Paclitaxel control                                                                                | AC                      | <i>Hypericum attenuatum</i> Fisch. ex Choisy, AP, EtOH | [43]  |
| <b>Acylphloroglucinol</b> | Hyperberin A   | Cell viability, Oxidative stress | <i>In vitro</i><br>HCT116, RAW 264.7 cells                      | <b>Decreased</b> HCT 116 cell viability<br>Anti-inflammatory activity on LPS induced RAW264.7 cells | <b>Decreased:</b> NO production in RAW264.7 cells (IC <sub>50</sub> = 7.36 ± 0.97 μM vs IC <sub>50</sub> = 39.97 ± 0.1.32 μM<br>NMMA positive control)<br><b>Increased:</b> RAW264.7 cell viability  | AC, AI                  | <i>Hypericum beanii</i> N. Robson, R, EtOH             | [44]  |
| <b>Acylphloroglucinol</b> | Hyperberin B   | Cell viability, Oxidative stress | <i>In vitro</i><br>HCT116, RAW 264.7 cells                      | <b>Decreased</b> HCT 116 cell viability<br>Anti-inflammatory activity on LPS induced RAW264.7 cells | <b>Decreased:</b> NO production in RAW264.7 cells (IC <sub>50</sub> = 14.00 ± 0.14 μM vs IC <sub>50</sub> = 39.97 ± 0.1.32 μM<br>NMMA positive control)<br><b>Increased:</b> RAW264.7 cell viability | AC, AI                  | <i>Hypericum beanii</i> N. Robson, R, EtOH             | [44]  |
| <b>Acylphloroglucinol</b> | Hyperbeanol B  | Cell viability                   | <i>In vitro</i><br>K562 cells                                   | <b>Decreased</b> cell viability (modest)                                                            | IC <sub>50</sub> =16.9 μM                                                                                                                                                                            | AC                      | <i>Hypericum beanii</i> N. Robson, AP, MeOH            | [45]  |
| <b>Acylphloroglucinol</b> | Hyperbeanol D  | Cell viability                   | <i>In vitro</i><br>K562 cells                                   | <b>Decreased</b> cell viability (modest)                                                            | IC <sub>50</sub> =20.7 μM                                                                                                                                                                            | AC                      | <i>Hypericum beanii</i> N. Robson, AP, MeOH            | [45]  |

| Compound Class            | Compound    | Measurement                    | Method                                                                 | Outcome                                                                                         | Therapeutic Application | Species, Plant Part and Extract          | Ref # |
|---------------------------|-------------|--------------------------------|------------------------------------------------------------------------|-------------------------------------------------------------------------------------------------|-------------------------|------------------------------------------|-------|
| <b>Acylphloroglucinol</b> | Bellumone Q | Oxidative stress, Adipogenesis | <i>In vitro</i> RAW264.7 cell lines, L02 cell lines                    | <b>Decreased</b> LPS-induced NO production<br><b>Decreased</b> intracellular lipid accumulation | CP, Ad.In               | <i>Hypericum bellum</i> H.L.Li, Fl, EtOH | [46]  |
| <b>Acylphloroglucinol</b> | Bellumone J | Radical scavenging             | <i>In vitro</i> RAW264.7 cell lines, Radical scavenging capacity model | <b>Decreased</b> ROS titers                                                                     | CP                      | <i>Hypericum bellum</i> H.L.Li, Fl, EtOH | [46]  |
| <b>Acylphloroglucinol</b> | Bellumone N | Radical scavenging             | <i>In vitro</i> RAW264.7 cell lines, Radical scavenging capacity model | <b>Decreased</b> ROS titers                                                                     | CP                      | <i>Hypericum bellum</i> H.L.Li, Fl, EtOH | [46]  |
| <b>Acylphloroglucinol</b> | Bellumone O | Radical scavenging             | <i>In vitro</i> RAW264.7 cell lines, Radical scavenging capacity model | <b>Decreased</b> ROS titers                                                                     | CP                      | <i>Hypericum bellum</i> H.L.Li, Fl, EtOH | [46]  |



| Compound Class            | Compound     | Measurement        | Method                                                                                  | Outcome                                                  | Therapeutic Application                               | Species, Plant Part and Extract                         | Ref # |
|---------------------------|--------------|--------------------|-----------------------------------------------------------------------------------------|----------------------------------------------------------|-------------------------------------------------------|---------------------------------------------------------|-------|
| <b>Acylphloroglucinol</b> | Chinesin I   | Radical scavenging | <i>In vitro</i> RAW264.7 cell lines, Radical scavenging capacity model                  | <b>Decreased</b> ROS titers                              | CP                                                    | <i>Hypericum bellum</i> H.L.Li, Fl, EtOH                | [46]  |
| <b>Acylphloroglucinol</b> | Chinesin II  | Radical scavenging | <i>In vitro</i> RAW264.7 cell lines, Radical scavenging capacity model                  | <b>Decreased</b> ROS titers                              | CP                                                    | <i>Hypericum bellum</i> H.L.Li, Fl, EtOH                | [46]  |
| <b>Acylphloroglucinol</b> | Bellumone D  | Adipogenesis       | <i>In vitro</i> L02 cell model                                                          | <b>Decreased</b> intracellular lipid accumulation        | Ad.In                                                 | <i>Hypericum bellum</i> H.L.Li, Fl, EtOH                | [46]  |
| <b>Acylphloroglucinol</b> | Bellumone K  | Adipogenesis       | <i>In vitro</i> L02 cell model                                                          | <b>Decreased</b> intracellular lipid accumulation        | Ad.In                                                 | <i>Hypericum bellum</i> H.L.Li, Fl, EtOH                | [46]  |
| <b>Acylphloroglucinol</b> | Hyperibone J | Adipogenesis       | <i>In vitro</i> L02 cell model                                                          | <b>Decreased</b> intracellular lipid accumulation        | Ad.In                                                 | <i>Hypericum bellum</i> H.L.Li, Fl, EtOH                | [46]  |
| <b>Acylphloroglucinol</b> | Uliginosin B | Cell viability     | <i>In vitro</i> OVCAR-3, NCI-ADR/RES, UACC-62, MCF-7, 786-0, NCI-H460, PC-3, HT29 cells | <b>Decreased</b> cell proliferation (selective activity) | Mean TGI= 3.91µg/mL vs 0.88µg/mL Doxorubicine control | AC<br><i>Hypericum brasiliense</i> Choisy, AP, n-Hexane | [47]  |

| Compound Class            | Compound        | Measurement    | Method                                                      | Outcome                                                                                                    | Therapeutic Application                                                                                                                            | Species, Plant Part and Extract | Ref #                                                   |      |
|---------------------------|-----------------|----------------|-------------------------------------------------------------|------------------------------------------------------------------------------------------------------------|----------------------------------------------------------------------------------------------------------------------------------------------------|---------------------------------|---------------------------------------------------------|------|
| <b>Acylphloroglucinol</b> | Otogirinin B    | Cell viability | <i>In vitro</i> A549 cells                                  | <b>Decreased</b> A549 cell - viability                                                                     |                                                                                                                                                    | AC                              | <i>Hypericum choisianum</i> Wall. Ex N.Robson, AP, EtOH | [48] |
| <b>Acylphloroglucinol</b> | Hypercohin B    | Cell viability | <i>In vitro</i> HL-60, A-549, MCF-7, SW480 cells            | <b>Decreased</b> cell viability (selective toxicity)                                                       | IC <sub>50</sub> = 15.6 - 5.8μM vs IC <sub>50</sub> = 18.7 - 1.8μM<br>Cisplatin control<br>IC <sub>50</sub> = 0.1 - <0.008μM<br>Paclitaxel control | AC                              | <i>Hypericum cohaerens</i> N.Robson, AP, MeOH           | [49] |
| <b>Acylphloroglucinol</b> | Hypercohin C    | Cell viability | <i>In vitro</i> HL-60, SMMC-7721, A-549, SW480 cells        | <b>Decreased</b> cell viability (selective toxicity)                                                       | IC <sub>50</sub> = 17.9 - 8.2μM vs IC <sub>50</sub> = 15.6 - 1.8μM<br>Cisplatin control<br>IC <sub>50</sub> = 0.1 - <0.008μM<br>Paclitaxel control | AC                              | <i>Hypericum cohaerens</i> N.Robson, AP, MeOH           | [49] |
| <b>Acylphloroglucinol</b> | Hypercohin D    | Cell viability | <i>In vitro</i> HL-60, SMMC-7721, A-549, MCF-7, SW480 cells | <b>Decreased</b> cell viability (selective toxicity)                                                       | IC <sub>50</sub> = 9.5 - 5.6μM vs IC <sub>50</sub> = 15.6 - 1.8μM<br>Cisplatin control<br>IC <sub>50</sub> = 0.1 - <0.008μM<br>Paclitaxel control  | AC                              | <i>Hypericum cohaerens</i> N.Robson, AP, MeOH           | [49] |
| <b>Acylphloroglucinol</b> | Hyperelodione A | Cell viability | <i>In vitro</i> HeLa and MCF-7 cell lines                   | <b>Decreased</b> cell viability (selective cytotoxicity), cell proliferation<br><b>Increased</b> apoptosis | <b>Decreased</b> RXRα activation, cell growth                                                                                                      | AC                              | <i>Hypericum elodeoides</i> Choisy, WP, EtOH            | [50] |
| <b>Acylphloroglucinol</b> | Hyperelodione B | Cell viability | <i>In vitro</i> HeLa and MCF-7 cell lines                   | <b>Decreased</b> cell viability (selective cytotoxicity)                                                   | <b>Decreased</b> RXRα activation, cell growth                                                                                                      | AC                              | <i>Hypericum elodeoides</i> Choisy, WP, EtOH            | [50] |

| Compound Class            | Compound        | Measurement                         | Method                                                  | Outcome                                                  |                                                                                                                                                                   | Therapeutic Application | Species, Plant Part and Extract                        | Ref # |
|---------------------------|-----------------|-------------------------------------|---------------------------------------------------------|----------------------------------------------------------|-------------------------------------------------------------------------------------------------------------------------------------------------------------------|-------------------------|--------------------------------------------------------|-------|
| <b>Acylphloroglucinol</b> | Hyperelodione C | Cell viability                      | <i>In vitro</i> HeLa and MCF-7 cell lines               | <b>Decreased</b> cell viability (selective cytotoxicity) | <b>Decreased</b> RXR $\alpha$ activation, cell growth                                                                                                             | AC                      | <i>Hypericum elodeoides</i> Choisy, WP, EtOH           | [50]  |
| <b>Acylphloroglucinol</b> | Adotogirin      | Bacterial susceptibility            | <i>In vitro</i> <i>S. aureus</i> and <i>B. subtilis</i> | Active against all tested strains                        | MIC = 0.5–4.0 $\mu\text{g/mL}$ vs MIC <sub>50</sub> =1.0 $\mu\text{g/mL}$ positive control ( <i>S. aureus</i> )<br>MIC= 2 $\mu\text{g/mL}$ ( <i>B. subtilis</i> ) | AM                      | <i>Hypericum erectum</i> Thunb., R, MeOH               | [51]  |
| <b>Acylphloroglucinol</b> | Otogirin        | Bacterial susceptibility            | <i>In vitro</i> <i>S. aureus</i> and <i>B. subtilis</i> | Active against all tested strains                        | MIC = 0.5–8.0 $\mu\text{g/mL}$ vs MIC <sub>50</sub> =1.0 $\mu\text{g/mL}$ positive control ( <i>S. aureus</i> )<br>MIC= 2 $\mu\text{g/mL}$ ( <i>B. subtilis</i> ) | AM                      | <i>Hypericum erectum</i> Thunb., R, MeOH               | [51]  |
| <b>Acylphloroglucinol</b> | Otogirin        | Cell viability                      | <i>In vitro</i> PANC-1 cells                            | <b>Decreased</b> PANC-1 cell viability                   | IC <sub>50</sub> = 12.0 $\mu\text{M}$ vs IC <sub>50</sub> = 3.5 $\mu\text{M}$ Taxol control                                                                       | AC                      | <i>Hypericum faberi</i> R.Keller, WP, MeOH             | [52]  |
| <b>Acylphloroglucinol</b> | Uralione E      | Adipogenesis, Expression modulation | <i>In vitro</i> L02 cell model                          | <b>Decreased</b> intracellular lipid accumulation        | <b>Decreased</b> CD36 and FASN expression<br><b>Increased</b> PPAR $\alpha$ and ACOX1 expression                                                                  | Ad.In, IM               | <i>Hypericum forrestii</i> (Chitt.) N.Robson, Fr, EtOH | [53]  |
| <b>Acylphloroglucinol</b> | Hypercohin K    | Adipogenesis, Expression modulation | <i>In vitro</i> L02 cell model                          | <b>Decreased</b> intracellular lipid accumulation        | <b>Decreased</b> CD36 and FASN expression<br><b>Increased</b> PPAR $\alpha$ and ACOX1 expression                                                                  | Ad.In, IM               | <i>Hypericum forrestii</i> (Chitt.) N.Robson, Fr, EtOH | [53]  |

| Compound Class            | Compound      | Measurement                            | Method                                                                               | Outcome                                                                    | Therapeutic Application          | Species, Plant Part and Extract                        | Ref # |
|---------------------------|---------------|----------------------------------------|--------------------------------------------------------------------------------------|----------------------------------------------------------------------------|----------------------------------|--------------------------------------------------------|-------|
| <b>Acylphloroglucinol</b> | Hyperscabin D | Noradrenaline reuptake                 | <i>In vitro</i> synaptosome model                                                    | <b>Decreased</b> noradrenaline reuptake                                    | AD                               | <i>Hypericum forrestii</i> (Chitt.) N.Robson, Fr, EtOH | [54]  |
| <b>Acylphloroglucinol</b> | Hyperscabin F | Cell viability, Noradrenaline reuptake | <i>In vitro</i> synaptosome model, <i>In vitro</i> WB-F344 induced cell damage model | <b>Decreased</b> noradrenaline reuptake<br><b>Increased</b> cell viability | Cell survival rate:78%<br>AD, CP | <i>Hypericum forrestii</i> (Chitt.) N.Robson, Fr, EtOH | [54]  |
| <b>Acylphloroglucinol</b> | Hyperscabin J | Noradrenaline reuptake                 | <i>In vitro</i> synaptosome model                                                    | <b>Decreased</b> noradrenaline reuptake                                    | AD                               | <i>Hypericum forrestii</i> (Chitt.) N.Robson, Fr, EtOH | [54]  |
| <b>Acylphloroglucinol</b> | Hyperscabin K | Cell viability, Noradrenaline reuptake | <i>In vitro</i> synaptosome model, <i>In vitro</i> WB-F344 induced cell damage model | <b>Decreased</b> noradrenaline reuptake<br><b>Increased</b> cell viability | Cell survival rate:77%<br>AD, CP | <i>Hypericum forrestii</i> (Chitt.) N.Robson, Fr, EtOH | [54]  |
| <b>Acylphloroglucinol</b> | Hyperscabin L | Noradrenaline reuptake                 | <i>In vitro</i> synaptosome model                                                    | <b>Decreased</b> noradrenaline reuptake                                    | AD                               | <i>Hypericum forrestii</i> (Chitt.) N.Robson, Fr, EtOH | [54]  |
| <b>Acylphloroglucinol</b> | Hyphenrone A  | Cell viability, Noradrenaline reuptake | <i>In vitro</i> synaptosome model, <i>In vitro</i> WB-F344 induced cell damage model | <b>Decreased</b> noradrenaline reuptake<br><b>Increased</b> cell viability | Cell survival rate:73%<br>AD, CP | <i>Hypericum forrestii</i> (Chitt.) N.Robson, Fr, EtOH | [54]  |

| Compound Class            | Compound        | Measurement            | Method                            | Outcome                                 | Therapeutic Application | Species, Plant Part and Extract                           | Ref # |
|---------------------------|-----------------|------------------------|-----------------------------------|-----------------------------------------|-------------------------|-----------------------------------------------------------|-------|
| <b>Acylphloroglucinol</b> | Hyperuralone C  | Noradrenaline reuptake | <i>In vitro</i> synaptosome model | <b>Decreased</b> noradrenaline reuptake | AD, CP                  | <i>Hypericum forrestii</i> (Chitt.)<br>N.Robson, Fr, EtOH | [54]  |
| <b>Acylphloroglucinol</b> | Hyphenrone T    | Noradrenaline reuptake | <i>In vitro</i> synaptosome model | <b>Decreased</b> noradrenaline reuptake | AD                      | <i>Hypericum forrestii</i> (Chitt.)<br>N.Robson, Fr, EtOH | [54]  |
| <b>Acylphloroglucinol</b> | Hyperforin A    | PTP1B Activity         | <i>In vitro</i> PTP1B model       | <b>Decreased</b> PTP1B activity         | ADb                     | <i>Hypericum forrestii</i> (Chitt.)<br>N.Robson, AP, EtOH | [55]  |
| <b>Acylphloroglucinol</b> | Hyperforin B    | PTP1B Activity         | <i>In vitro</i> PTP1B model       | <b>Decreased</b> PTP1B activity         | ADb                     | <i>Hypericum forrestii</i> (Chitt.)<br>N.Robson, AP, EtOH | [55]  |
| <b>Acylphloroglucinol</b> | Hyperichoisin A | PTP1B Activity         | <i>In vitro</i> PTP1B model       | <b>Decreased</b> PTP1B activity         | ADb                     | <i>Hypericum forrestii</i> (Chitt.)<br>N.Robson, AP, EtOH | [55]  |
| <b>Acylphloroglucinol</b> | Hypercohin G    | PTP1B Activity         | <i>In vitro</i> PTP1B model       | <b>Decreased</b> PTP1B activity         | ADb                     | <i>Hypericum forrestii</i> (Chitt.)<br>N.Robson, AP, EtOH | [55]  |
| <b>Acylphloroglucinol</b> | Sampsonione J   | PTP1B Activity         | <i>In vitro</i> PTP1B model       | <b>Decreased</b> PTP1B activity         | ADb                     | <i>Hypericum forrestii</i> (Chitt.)<br>N.Robson, AP, EtOH | [55]  |

| Compound Class     | Compound                   | Measurement                   | Method                                                           | Outcome   |                                                                  | Therapeutic Application                                                                                                              | Species, Plant Part and Extract                        | Ref #                                            |      |
|--------------------|----------------------------|-------------------------------|------------------------------------------------------------------|-----------|------------------------------------------------------------------|--------------------------------------------------------------------------------------------------------------------------------------|--------------------------------------------------------|--------------------------------------------------|------|
| Acylphloroglucinol | Otogirinin A               | PTP1B Activity                | <i>In vitro</i> PTP1B model                                      | Decreased | PTP1B activity                                                   | ADb                                                                                                                                  | <i>Hypericum forrestii</i> (Chitt.) N.Robson, AP, EtOH | [55]                                             |      |
| Acylphloroglucinol | Sampsonione H              | PTP1B Activity                | <i>In vitro</i> PTP1B model                                      | Decreased | PTP1B activity                                                   | ADb                                                                                                                                  | <i>Hypericum forrestii</i> (Chitt.) N.Robson, AP, EtOH | [55]                                             |      |
| Acylphloroglucinol | 13 - UNIDENTIFIED COMPOUND | AChE activity                 | <i>In vitro</i>                                                  | Decreased | AChE activity                                                    | IC <sub>50</sub> =37.2μM                                                                                                             | Alz                                                    | <i>Hypericum henryi</i> H. Lév.&Vaniot, AP, MeOH | [56] |
| Acylphloroglucinol | Hyphenrone J               | AChE activity, cell viability | <i>In vitro</i> HL-60, A-549, SMMC-7721, MCF-7, and SW-480 cells | Decreased | AChE activity<br>Selective cytotoxicity against all tested cells | AChE inhibition: IC <sub>50</sub> =25.4μM<br>Citotoxicity: IC <sub>50</sub> = 7.0-1.7 μM vs IC <sub>50</sub> <0.008 μM Taxol control | Alz, AC                                                | <i>Hypericum henryi</i> H. Lév.&Vaniot, AP, MeOH | [56] |
| Acylphloroglucinol | Hypercalin C               | Cell viability                | <i>In vitro</i> HL-60, A-549, SMMC-7721, MCF-7, and SW-480 cells |           | Selective cytotoxicity against all tested cells                  | IC <sub>50</sub> = 8.9-2.3 μM vs IC <sub>50</sub> <0.008 μM Taxol control                                                            | AC                                                     | <i>Hypericum henryi</i> H. Lév.&Vaniot, AP, MeOH | [56] |
| Acylphloroglucinol | 26 - UNIDENTIFIED COMPOUND | AChE activity                 | <i>In vitro</i>                                                  | Decreased | AChE activity                                                    | IC <sub>50</sub> =26.4μM                                                                                                             | Alz                                                    | <i>Hypericum henryi</i> H. Lév.&Vaniot, AP, MeOH | [56] |

| Compound Class            | Compound                   | Measurement                        | Method                                                                  |                                                          | Outcome                                                                                                                                                                                                                                        | Therapeutic Application | Species, Plant Part and Extract                  | Ref # |
|---------------------------|----------------------------|------------------------------------|-------------------------------------------------------------------------|----------------------------------------------------------|------------------------------------------------------------------------------------------------------------------------------------------------------------------------------------------------------------------------------------------------|-------------------------|--------------------------------------------------|-------|
| <b>Acylphloroglucinol</b> | 40 - UNIDENTIFIED COMPOUND | AChE activity                      | <i>In vitro</i>                                                         | <b>Decreased</b> AChE activity                           | IC <sub>50</sub> =9.8μM                                                                                                                                                                                                                        | Alz                     | <i>Hypericum henryi</i> H. Lév.&Vaniot, AP, MeOH | [56]  |
| <b>Acylphloroglucinol</b> | Hyperenol                  | Cell viability                     | <i>In vitro</i> HeLa, GFP-LC3 HeLa, YFP-Parkin HeLa and A549 cell lines | <b>Decreased</b> cell viability (selective cytotoxicity) | IC <sub>50</sub> = 4.18±0.43 - 0.88±0.042 μM vs IC <sub>50</sub> =31.31±0.76 - 2.98±108μM Etoposide control                                                                                                                                    | AC                      | <i>Hypericum henryi</i> H. Lév.&Vaniot, WP, MeOH | [57]  |
| <b>Acylphloroglucinol</b> | Hyphenrone J               | Cell viability, cell proliferation | <i>In vitro</i> HeLa, GFP-LC3 HeLa, YFP-Parkin HeLa and A549 cell lines | <b>Decreased</b> cell viability (selective cytotoxicity) | <b>Increased</b> apoptosis, autophagy, PINK1/Parkin mediated mitphagy<br><b>Decreased</b> A549 cells metastasis <i>in vitro</i><br>IC <sub>50</sub> = 1.85±0.18 - 0.07±0.04 μM vs IC <sub>50</sub> =31.31±0.76 - 2.98±108μM Etoposide control  | AC                      | <i>Hypericum henryi</i> H. Lév.&Vaniot, WP, MeOH | [57]  |
| <b>Acylphloroglucinol</b> | Hyphenrone K               | Cell viability, cell proliferation | <i>In vitro</i> HeLa, GFP-LC3 HeLa, YFP-Parkin HeLa and A549 cell lines | <b>Decreased</b> cell viability (selective cytotoxicity) | <b>Increased</b> apoptosis, autophagy, PINK1/Parkin mediated mitphagy<br><b>Decreased</b> A549 cells metastasis <i>in vitro</i><br>IC <sub>50</sub> = 3.10±0.11 - 0.09±0.099 μM vs IC <sub>50</sub> =31.31±0.76 - 2.98±108μM Etoposide control | AC                      | <i>Hypericum henryi</i> H. Lév.&Vaniot, WP, MeOH | [57]  |

| Compound Class            | Compound       | Measurement    | Method                                                                  |                                                          | Outcome                                                                                                     | Therapeutic Application | Species, Plant Part and Extract                                      | Ref # |
|---------------------------|----------------|----------------|-------------------------------------------------------------------------|----------------------------------------------------------|-------------------------------------------------------------------------------------------------------------|-------------------------|----------------------------------------------------------------------|-------|
| <b>Acylphloroglucinol</b> | Hyphenrone E   | Cell viability | <i>In vitro</i> HeLa, GFP-LC3 HeLa, YFP-Parkin HeLa and A549 cell lines | <b>Decreased</b> cell viability (selective cytotoxicity) | IC <sub>50</sub> = 22.16±0.83 - 0.89±0.41 µM vs IC <sub>50</sub> =31.31±0.76 - 2.98±108µM Etoposide control | AC                      | <i>Hypericum henryi</i> H. Lév.&Vaniot, WP, MeOH                     | [57]  |
| <b>Acylphloroglucinol</b> | Uralodin C     | Cell viability | <i>In vitro</i> HepG2, SGC7901, HL-60, and K562 cells                   | <b>Decreased</b> cell viability (selective activity)     | IC <sub>50</sub> = 32.1±2.1 - 14.3±1.3µM vs IC <sub>50</sub> = 17.4±1.3 - 1.9±0.3µM Cisplatin control       | AC                      | <i>Hypericum henryi</i> subsp. uraloides (Rehder) N.Robson, AP, MeOH | [58]  |
| <b>Acylphloroglucinol</b> | Uralodin A     | Cell viability | <i>In vitro</i> HepG2, SGC7901, HL-60, and K562 cells                   | <b>Decreased</b> cell viability (selective activity)     | IC <sub>50</sub> = 59.7±3.3 - 16.0±0.9µM vs IC <sub>50</sub> = 17.4±1.3 - 1.9±0.3µM Cisplatin control       | AC                      | <i>Hypericum henryi</i> subsp. uraloides (Rehder) N.Robson, AP, MeOH | [58]  |
| <b>Acylphloroglucinol</b> | Furohyperforin | Cell viability | <i>In vitro</i> HepG2, SGC7901, HL-60, and K562 cells                   | <b>Decreased</b> cell viability (selective activity)     | IC <sub>50</sub> = 46.2±3.4 - 18.5±1.9µM vs IC <sub>50</sub> = 17.4±1.3 - 1.9±0.3µM Cisplatin control       | AC                      | <i>Hypericum henryi</i> subsp. uraloides (Rehder) N.Robson, AP, MeOH | [58]  |
| <b>Acylphloroglucinol</b> | Hookerione K   | Cell viability | <i>In vitro</i> 7402, BIU-87, ECA-109, HeLa-S3, PANC-1 cells            | <b>Decreased</b> cell viability (selective activity)     | IC <sub>50</sub> =17.24µM against ECA-109                                                                   | AC                      | <i>Hypericum hookerianum</i> Wight & Arn., AP, MeOH                  | [59]  |
| <b>Acylphloroglucinol</b> | Hookerione L   | Cell viability | <i>In vitro</i> 7402, BIU-87, ECA-109, HeLa-S3, PANC-1 cells            | <b>Decreased</b> cell viability (selective activity)     | IC <sub>50</sub> =10.18µM against ECA-109                                                                   | AC                      | <i>Hypericum hookerianum</i> Wight & Arn., AP, MeOH                  | [59]  |



| Compound Class            | Compound       | Measurement    | Method                                                       |                                                      | Outcome                                                                             | Therapeutic Application | Species, Plant Part and Extract                     | Ref # |
|---------------------------|----------------|----------------|--------------------------------------------------------------|------------------------------------------------------|-------------------------------------------------------------------------------------|-------------------------|-----------------------------------------------------|-------|
| <b>Acylphloroglucinol</b> | Hookerione N   | Cell viability | <i>In vitro</i> 7402, BIU-87, ECA-109, HeLa-S3, PANC-1 cells | <b>Decreased</b> cell viability (selective activity) | IC <sub>50</sub> =9.88μM against ECA-109                                            | AC                      | <i>Hypericum hookerianum</i> Wight & Arn., AP, MeOH | [59]  |
| <b>Acylphloroglucinol</b> | Hookerione O   | Cell viability | <i>In vitro</i> 7402, BIU-87, ECA-109, HeLa-S3, PANC-1 cells | <b>Decreased</b> cell viability (selective activity) | IC <sub>50</sub> =12.5μM against ECA-109; IC <sub>50</sub> =13.37μM against Hela-S3 | AC                      | <i>Hypericum hookerianum</i> Wight & Arn., AP, MeOH | [59]  |
| <b>Acylphloroglucinol</b> | Hookerione Q   | Cell viability | <i>In vitro</i> 7402, BIU-87, ECA-109, HeLa-S3, PANC-1 cells | <b>Decreased</b> cell viability (selective activity) | IC <sub>50</sub> =8.27μM against ECA-109                                            | AC                      | <i>Hypericum hookerianum</i> Wight & Arn., AP, MeOH | [59]  |
| <b>Acylphloroglucinol</b> | Hookerianone A | USP Activity   | <i>In vitro</i> USP7 model                                   | <b>Decreased</b> USP activity                        | 87% USP inhibition                                                                  | AC                      | <i>Hypericum hookerianum</i> Wight & Arn., AP, EtOH | [60]  |
| <b>Acylphloroglucinol</b> | Hookerianone E | USP Activity   | <i>In vitro</i> USP7 model                                   | <b>Decreased</b> USP activity                        | 87% USP inhibition                                                                  | AC                      | <i>Hypericum hookerianum</i> Wight & Arn., AP, EtOH | [60]  |
| <b>Acylphloroglucinol</b> | Hypercalin C   | USP Activity   | <i>In vitro</i> USP7 model                                   | <b>Decreased</b> USP activity                        | 91% USP inhibition                                                                  | AC                      | <i>Hypericum hookerianum</i> Wight & Arn., AP, EtOH | [60]  |
| <b>Acylphloroglucinol</b> | Tomoeone A     | USP Activity   | <i>In vitro</i> USP7 model                                   | <b>Decreased</b> USP activity                        | 86% USP inhibition                                                                  | AC                      | <i>Hypericum hookerianum</i> Wight & Arn., AP, EtOH | [60]  |

| Compound Class            | Compound          | Measurement              | Method                                                                                                                                |                                                                                                   | Outcome                                                                                                                                                                                                                                           | Therapeutic Application | Species, Plant Part and Extract                     | Ref # |
|---------------------------|-------------------|--------------------------|---------------------------------------------------------------------------------------------------------------------------------------|---------------------------------------------------------------------------------------------------|---------------------------------------------------------------------------------------------------------------------------------------------------------------------------------------------------------------------------------------------------|-------------------------|-----------------------------------------------------|-------|
| <b>Acylphloroglucinol</b> | Furohyperforin    | USP Activity             | <i>In vitro</i> USP7 model                                                                                                            | <b>Decreased</b> USP activity                                                                     | 95% USP inhibition                                                                                                                                                                                                                                | AC                      | <i>Hypericum hookerianum</i> Wight & Arn., AP, EtOH | [60]  |
| <b>Acylphloroglucinol</b> | Hyphenrone T      | USP Activity             | <i>In vitro</i> USP7 model                                                                                                            | <b>Decreased</b> USP activity                                                                     | 79% USP inhibition                                                                                                                                                                                                                                | AC                      | <i>Hypericum hookerianum</i> Wight & Arn., AP, EtOH | [60]  |
| <b>Acylphloroglucinol</b> | Oxepahyperforin   | USP Activity             | <i>In vitro</i> USP7 model                                                                                                            | <b>Decreased</b> USP activity                                                                     | 83% USP inhibition                                                                                                                                                                                                                                | AC                      | <i>Hypericum hookerianum</i> Wight & Arn., AP, EtOH | [60]  |
| <b>Acylphloroglucinol</b> | Hyperjaponicols A | Bacterial susceptibility | <i>In vitro</i> <i>Escherichia coli</i> , <i>Staphylococcus aureus</i> , <i>Salmonella typhimurium</i> , <i>Enterococcus faecalis</i> | Selective antimicrobial activity against bacterial species                                        | MICs= 1.8μM ( <i>E. coli</i> , <i>S. aureus</i> , <i>E. faecalis</i> ), 0.9μM ( <i>S. typhimurium</i> ) vs Cefotaxime control<br>MICs= 0.4μM ( <i>E. coli</i> , <i>E. faecalis</i> ), 3.3μM ( <i>S. aureus</i> , <i>S. typhimurium</i> )          | AM                      | <i>Hypericum japonicum</i> Thunb., WP, MeOH         | [61]  |
| <b>Acylphloroglucinol</b> | Hyperjaponicols B | Bacterial susceptibility | <i>In vitro</i> <i>Escherichia coli</i> , <i>Staphylococcus aureus</i> , <i>Salmonella typhimurium</i> , <i>Enterococcus faecalis</i> | Moderate lipase inhibitory activity<br>Selective antimicrobial activity against bacterial species | MICs= 0.9μM ( <i>E. coli</i> ), 3.4μM ( <i>S. aureus</i> ), 1.7μM ( <i>S. typhimurium</i> , <i>E. faecalis</i> ) vs Cefotaxime control<br>MICs= 0.4μM ( <i>E. coli</i> , <i>E. faecalis</i> ), 3.3μM ( <i>S. aureus</i> , <i>S. typhimurium</i> ) | AM                      | <i>Hypericum japonicum</i> Thunb., WP, MeOH         | [61]  |

| Compound Class            | Compound          | Measurement              | Method                                                                                                                                            |                                                                                                   | Outcome                                                                                                                                                                                                                                     | Therapeutic Application | Species, Plant Part and Extract             | Ref # |
|---------------------------|-------------------|--------------------------|---------------------------------------------------------------------------------------------------------------------------------------------------|---------------------------------------------------------------------------------------------------|---------------------------------------------------------------------------------------------------------------------------------------------------------------------------------------------------------------------------------------------|-------------------------|---------------------------------------------|-------|
| <b>Acylphloroglucinol</b> | Hyperjaponicols C | Bacterial susceptibility | <i>In vitro</i><br><i>Escherichia coli</i> ,<br><i>Staphylococcus aureus</i> ,<br><i>Salmonella typhimurium</i> ,<br><i>Enterococcus faecalis</i> | Moderate lipase inhibitory activity<br>Selective antimicrobial activity against bacterial species | MICs= 0.8μM ( <i>E. coli</i> , <i>S. typhimurium</i> , <i>E. faecalis</i> ). 3.3μM ( <i>S. aureus</i> )<br>vs Cefotaxime control<br>MICs= 0.4μM ( <i>E. coli</i> , <i>E. faecalis</i> ), 3.3μM ( <i>S. aureus</i> , <i>S. typhimurium</i> ) | AM                      | <i>Hypericum japonicum</i> Thunb., WP, MeOH | [61]  |
| <b>Acylphloroglucinol</b> | Hyperjaponicols D | Bacterial susceptibility | <i>In vitro</i><br><i>Escherichia coli</i> ,<br><i>Staphylococcus aureus</i> ,<br><i>Salmonella typhimurium</i> ,<br><i>Enterococcus faecalis</i> | Selective antimicrobial activity against bacterial species                                        | MICs= 0.9μM ( <i>E. coli</i> , <i>S. typhimurium</i> , <i>E. faecalis</i> ), 1.7μM ( <i>S. aureus</i> )<br>vs Cefotaxime control<br>MICs= 0.4μM ( <i>E. coli</i> , <i>E. faecalis</i> ), 3.3μM ( <i>S. aureus</i> , <i>S. typhimurium</i> ) | AM                      | <i>Hypericum japonicum</i> Thunb., WP, MeOH | [61]  |
| <b>Acylphloroglucinol</b> | Hyperjapone A     | Cell viability           | <i>In vitro</i> HT22 cells; DPPH free radical scavenging activity model                                                                           | <b>Decreased</b> induced ferroptosis                                                              |                                                                                                                                                                                                                                             | CP                      | <i>Hypericum japonicum</i> Thunb., WP, EtOH | [62]  |
| <b>Acylphloroglucinol</b> | Hyperjovinol A    | Radical scavenging       | <i>In vitro</i>                                                                                                                                   | Antioxidant activity comparable to that of vitamin C and vitamin E                                |                                                                                                                                                                                                                                             | CP                      | <i>Hypericum jovis</i> Greuter, -, -        | [63]  |

| Compound Class            | Compound               | Measurement              | Method                                                                                                                                      |                                                                                        | Outcome                                                                                                                                              | Therapeutic Application | Species, Plant Part and Extract              | Ref # |
|---------------------------|------------------------|--------------------------|---------------------------------------------------------------------------------------------------------------------------------------------|----------------------------------------------------------------------------------------|------------------------------------------------------------------------------------------------------------------------------------------------------|-------------------------|----------------------------------------------|-------|
| <b>Acylphloroglucinol</b> | Petiolin J             | Bacterial susceptibility | <i>In vitro</i> <i>Micrococcs luteus</i> , <i>Cryptococcus neoformans</i> , <i>Trichophyton mentagrophytes</i>                              | Active against all tested strains (selective activity)                                 | MIC= 8 µg/mL ( <i>Micrococcus luteus</i> )<br>MIC=16 µg/mL ( <i>Cryptococcus neoformans</i> )<br>MIC=16 µg/mL ( <i>Trichophyton mentagrophytes</i> ) | AM                      | <i>Hypericum kiusianum</i> Koidz., AP, MeOH  | [64]  |
| <b>Acylphloroglucinol</b> | Longisglucinol A       | Oxidative stress         | <i>In vitro</i> RAW264.7 cell lines                                                                                                         | <b>Decreased</b> LPS-induced NO production                                             | IC <sub>50</sub> = 9.46±1.21µM vs IC <sub>50</sub> =6.70±0.58µM<br>Dexamethasone control                                                             | CP                      | <i>Hypericum longistylum</i> Oliv., AP, EtOH | [65]  |
| <b>Acylphloroglucinol</b> | Uliginosin C           | Fungal susceptibility    | <i>In vitro</i> <i>Candida albicans</i> , <i>C. parapsilosis</i> , <i>C. glabrata</i> , <i>C. lusitaniae</i> , <i>C. pararugosa</i> strains | <b>Decreased</b> fungal growth                                                         | MIC <sub>50</sub> = >32 - 6±0.2 µM vs MIC <sub>50</sub> =>208 - 0.13±0.0µM<br>Fluconazole control                                                    | AF                      | <i>Hypericum mexicanum</i> L., R, L, S, MeOH | [66]  |
| <b>Acylphloroglucinol</b> | 3' Prenyl Uliginosin B | Fungal susceptibility    | <i>In vitro</i> <i>Candida albicans</i> , <i>C. parapsilosis</i> , <i>C. glabrata</i> , <i>C. lusitaniae</i> , <i>C. pararugosa</i> strains | <b>Decreased</b> fungal growth                                                         | MIC <sub>50</sub> = >30 - 3±0.2 µM vs MIC <sub>50</sub> =>208 - 0.13±0.0µM<br>Fluconazole control                                                    | AF                      | <i>Hypericum mexicanum</i> L., R, L, S, MeOH | [66]  |
| <b>Acylphloroglucinol</b> | Hypermonin A           | Cell viability           | <i>In vitro</i> PC12 cells                                                                                                                  | <b>Decreased</b> corticosterone induced cell damage<br><b>Increased</b> cell viability | IC <sub>50</sub> =20 µM                                                                                                                              | CP                      | <i>Hypericum monogynum</i> L., L, Tws, MeOH  | [67]  |

| Compound Class     | Compound            | Measurement           | Method                                             | Outcome                  |                               | Therapeutic Application | Species, Plant Part and Extract  | Ref # |
|--------------------|---------------------|-----------------------|----------------------------------------------------|--------------------------|-------------------------------|-------------------------|----------------------------------|-------|
| Acylphloroglucinol | Hypermoine E        | Expression modulation | In vitro HepG2/ADR and MCF-7/ADR cancer cell lines | Decreased                | multidrug resistance activity | IM, AC                  | Hypericum monogynum L., Fl, MeOH | [68]  |
| Acylphloroglucinol | Hyperlielliptone HA | Expression modulation | In vitro HepG2/ADR and MCF-7/ADR cancer cell lines | Decreased                | multidrug resistance activity | IM, AC                  | Hypericum monogynum L., Fl, MeOH | [68]  |
| Acylphloroglucinol | Hypermonin C        | Cell viability        | In vitro SH-SY5Y and PC12 cell lines               | Increased cell viability | Decreased induced cell damage | CP                      | Hypericum monogynum L., AP, MeOH | [69]  |
| Acylphloroglucinol | Furoadhyperforin    | Cell viability        | In vitro SH-SY5Y and PC12 cell lines               | Increased cell viability | Decreased induced cell damage | CP                      | Hypericum monogynum L., AP, MeOH | [69]  |
| Acylphloroglucinol | Furohyperforin      | Cell viability        | In vitro SH-SY5Y and PC12 cell lines               | Increased cell viability | Decreased induced cell damage | CP                      | Hypericum monogynum L., AP, MeOH | [69]  |
| Acylphloroglucinol | Attenuatumione      | Cell viability        | In vitro SH-SY5Y and PC12 cell lines               | Increased cell viability | Decreased induced cell damage | CP                      | Hypericum monogynum L., AP, MeOH | [69]  |

| Compound Class     | Compound                                                     | Measurement                   | Method                                | Outcome                                                                               |                                                                                                                   | Therapeutic Application | Species, Plant Part and Extract                     | Ref # |
|--------------------|--------------------------------------------------------------|-------------------------------|---------------------------------------|---------------------------------------------------------------------------------------|-------------------------------------------------------------------------------------------------------------------|-------------------------|-----------------------------------------------------|-------|
| Acylphloroglucinol | Japonicin A                                                  | Cell viability                | In vitro OVCAR-3                      | Decreased cell viability (selective toxicity)                                         | Cell viability%: 91.0±1.4 - 65.0±0.6% vs 58.0±7.9% paclitaxel control                                             | AC                      | Hypericum myrianthum Cham. & Schltdl., AP, n-Hexane | [70]  |
| Acylphloroglucinol | Uliginosin B                                                 | Cell viability                | In vitro OVCAR-3                      | Decreased cell viability (selective toxicity)                                         | Cell viability%: 81.0±1.0 - 66.0±0.8% vs 58.0±7.9% paclitaxel control                                             | AC                      | Hypericum myrianthum Cham. & Schltdl., AP, n-Hexane | [70]  |
| Acylphloroglucinol | Uliginosin B                                                 | Induced nociceptive behaviour | In vivo mouse model                   | Decreased painful behaviours<br>Ataxic effect                                         |                                                                                                                   | AD, AN                  | Hypericum myrianthum Cham. & Schltdl., AP, n-Hexane | [71]  |
| Acylphloroglucinol | Olympicin A                                                  | Bacterial susceptibility      | In vitro MDR/MR Staphylococcus aureus | Active against drug resistant S. aureus strains                                       | MIC= 0.0005 - 0.001 µg/mL vs Norfloxacin MIC= 0.0005 - 0.256 µg/mL<br>Vancomycin MIC= 0.00025 - 0.0005 µg/mL      | AM                      | Hypericum olympicum L, -, -                         | [72]  |
| Acylphloroglucinol | (S)-1-(2,4-Dihydroxy-6-(octyloxy)phenyl)-2-methylbutan-1-one | Bacterial susceptibility      | In vitro MDR/MR Staphylococcus aureus | Active against drug resistant S. aureus strains<br>Olympicin A synthesised derivative | MIC = 0.00025 - 0.0005 µg/mL vs Norfloxacin MIC = 0.0005 - 0.256 µg/mL<br>Vancomycin MIC = 0.00025 - 0.0005 µg/mL | AM                      | Hypericum olympicum L, -, -                         | [72]  |
| Acylphloroglucinol | Olympicin A                                                  | Bacterial susceptibility      | In vitro S.aureus, MRSA               | Active against all tested strains                                                     | MIC = 2.9 - 1.45µM vs MIC = 1276 - 3.1µM controls                                                                 | AM                      | Hypericum olympicum L. cf. uniflorum, AP, n-Hexane  | [73]  |

| Compound Class            | Compound        | Measurement                                          | Method                                                       | Outcome                                                        |                                                                                                                  | Therapeutic Application | Species, Plant Part and Extract           | Ref # |
|---------------------------|-----------------|------------------------------------------------------|--------------------------------------------------------------|----------------------------------------------------------------|------------------------------------------------------------------------------------------------------------------|-------------------------|-------------------------------------------|-------|
| <b>Acylphloroglucinol</b> | Hyperpatulol D  | Cell migration<br>Vimentin and E-cadherin expression | <i>In vitro</i> U2-OS cells                                  | <b>Decreased</b> U2-OS migration                               | <b>Increased</b> E-cadherin expression<br><b>Decreased</b> Vimentin expression                                   | AC                      | <i>Hypericum patulum</i> Thunb., Fl, EtOH | [74]  |
| <b>Acylphloroglucinol</b> | Norhyperpalum B | Cell viability                                       | <i>In vitro</i> Hep3B, HepG2, SMMC-7721 and Huh-7 cell lines | <b>Decreased</b> cell viability (selective cytotoxicity)       | <b>Induced</b> S phase cell cycle arrest, apoptosis                                                              | AC                      | <i>Hypericum patulum</i> Thunb., L, EtOH  | [75]  |
| <b>Acylphloroglucinol</b> | Hypaluton A     | Cell proliferation                                   | <i>In vitro</i> B lymphocytes proliferation model            | <b>Decreased</b> LPS induced B lymphocytes proliferation       | IC <sub>50</sub> = 6.86±0.72µM vs IC <sub>50</sub> <1µM cyspin control                                           | IM                      | <i>Hypericum patulum</i> Thunb., L, EtOH  | [76]  |
| <b>Acylphloroglucinol</b> | Hyperforatin L  | AChE activity                                        | <i>In vitro</i> PC12 cells                                   | <b>Decreased</b> PC12 cells corticosterone induced cell damage | Acetylcholinesterase inhibition<br>IC <sub>50</sub> = 11.9 µM vs IC <sub>50</sub> =0.2 ± 0.02 µM tacrine control | CP                      | <i>Hypericum perforatum</i> L., AP, EtOH  | [77]  |

| Compound Class            | Compound        | Measurement             | Method                           | Outcome                                                 | Therapeutic Application                                                                                                                                                                                                           | Species, Plant Part and Extract                   | Ref # |
|---------------------------|-----------------|-------------------------|----------------------------------|---------------------------------------------------------|-----------------------------------------------------------------------------------------------------------------------------------------------------------------------------------------------------------------------------------|---------------------------------------------------|-------|
| <b>Acylphloroglucinol</b> | Hyperforin      | Expression modulation   | <i>In vitro</i><br>SH-SY5Y cells | <b>Regulated</b> gene expression, vs citalopram control | <b>Suppressed</b> FKBP5 mRNA induced increase expression, CREB induced decrease expression<br><b>Increased</b> CREB expression, GRIK4 mRNA expression, VEGF mRNA expression<br><b>Decreased</b> ARRB2 induced decrease expression | AD<br><i>Hypericum perforatum</i> L., -, -        | [15]  |
| <b>Acylphloroglucinol</b> | Hyperforatone E | AChE and BACE1 activity | <i>In vitro</i>                  | <b>Decreased</b> AChE and BACE1 activity                | AChE inhibition IC <sub>50</sub> = 7.9±0.7 µM vs IC <sub>50</sub> =0.3±0.006 µM Tacrine control<br>BACE1 inhibition rate 50.3±0.2% vs 40.0±3.8% EGCG control                                                                      | Alz<br><i>Hypericum perforatum</i> L., L, S, EtOH | [78]  |
| <b>Acylphloroglucinol</b> | Hyperforatone J | AChE and BACE1 activity | <i>In vitro</i>                  | <b>Decreased</b> AChE and BACE1 activity                | AChE inhibition IC <sub>50</sub> = 9.2±0.8 µM vs IC <sub>50</sub> =0.3±0.006 µM Tacrine control<br>BACE1 inhibition rate 34.3±2.6% vs 40.0±3.8% EGCG control                                                                      | Alz<br><i>Hypericum perforatum</i> L., L, S, EtOH | [78]  |
| <b>Acylphloroglucinol</b> | Hyperforatone H | AChE and BACE1 activity | <i>In vitro</i>                  | <b>Decreased</b> AChE and BACE1 activity                | AChE inhibition IC <sub>50</sub> = 7.6±0.3 µM vs IC <sub>50</sub> =0.3±0.006 µM Tacrine control<br>BACE1 inhibition rate 47.2±3.6% vs 40.0±3.8% EGCG control                                                                      | Alz<br><i>Hypericum perforatum</i> L., L, S, EtOH | [78]  |



| Compound Class            | Compound              | Measurement             | Method          |                                          | Outcome                                                                                                                                                            | Therapeutic Application | Species, Plant Part and Extract            | Ref # |
|---------------------------|-----------------------|-------------------------|-----------------|------------------------------------------|--------------------------------------------------------------------------------------------------------------------------------------------------------------------|-------------------------|--------------------------------------------|-------|
| <b>Acylphloroglucinol</b> | Hyperforatone O       | AChE and BACE1 activity | <i>In vitro</i> | <b>Decreased</b> AChE and BACE1 activity | AChE inhibition IC <sub>50</sub> = 6.9±0.3 µM vs IC <sub>50</sub> =0.3±0.006 µM<br>Tacrine control<br>BACE1 inhibition rate 34.6±3.2% vs 40.0±3.8%<br>EGCG control | Alz                     | <i>Hypericum perforatum</i> L., L, S, EtOH | [78]  |
| <b>Acylphloroglucinol</b> | Hyperforatin B        | AChE activity           | <i>In vitro</i> | <b>Decreased</b> AChE activity           | IC <sub>50</sub> = 8.83±0.599 µM vs IC <sub>50</sub> = 0.27±0.013 µM<br>Tacrine control                                                                            | Alz, CP                 | <i>Hypericum perforatum</i> L., L, S, EtOH | [79]  |
| <b>Acylphloroglucinol</b> | Hyperforatin D        | AChE activity           | <i>In vitro</i> | <b>Decreased</b> AChE activity           | IC <sub>50</sub> = 7.17±0.134 µM vs IC <sub>50</sub> = 0.27±0.013 µM<br>Tacrine control                                                                            | Alz, CP                 | <i>Hypericum perforatum</i> L., L, S, EtOH | [79]  |
| <b>Acylphloroglucinol</b> | 15-epi-Hyperforatin D | AChE activity           | <i>In vitro</i> | <b>Decreased</b> AChE activity           | IC <sub>50</sub> = 3.98±0.924 µM vs IC <sub>50</sub> = 0.27±0.013 µM<br>Tacrine control                                                                            | Alz, CP                 | <i>Hypericum perforatum</i> L., L, S, EtOH | [79]  |
| <b>Acylphloroglucinol</b> | 32-epi-Hyperforatin E | AChE activity           | <i>In vitro</i> | <b>Decreased</b> AChE activity           | IC <sub>50</sub> = 9.13±1.022 µM vs IC <sub>50</sub> = 0.27±0.013 µM<br>Tacrine control                                                                            | Alz, CP                 | <i>Hypericum perforatum</i> L., L, S, EtOH | [79]  |

| Compound Class            | Compound       | Measurement                   | Method                                  | Outcome                                                       | Therapeutic Application                                                                                                                                                                                                                             | Species, Plant Part and Extract                          | Ref # |
|---------------------------|----------------|-------------------------------|-----------------------------------------|---------------------------------------------------------------|-----------------------------------------------------------------------------------------------------------------------------------------------------------------------------------------------------------------------------------------------------|----------------------------------------------------------|-------|
| <b>Acylphloroglucinol</b> | Hyperforatin F | AChE activity, Cell viability | <i>In vitro</i> SMMC7721 cells          | <b>Decreased</b> AChE activity, cell viability                | IC <sub>50</sub> = 8.75±0.521 µM vs IC <sub>50</sub> = 0.27±0.013 µM Tacrine control (AChE inhibition)<br>IC <sub>50</sub> = 10.0µM vs IC <sub>50</sub> =8.98µM cis-platin control vs IC <sub>50</sub> <0.008 µM Taxol control (SMMC7721 viability) | Alz,CP, AC<br><i>Hypericum perforatum</i> L., L, S, EtOH | [79]  |
| <b>Acylphloroglucinol</b> | Hyperforatin I | Cell viability                | <i>In vitro</i> SMMC7721 cells          | <b>Decreased</b> AChE activity, cell viability                | IC <sub>50</sub> = 9.13µM vs IC <sub>50</sub> =8.98µM cis-platin control vs IC <sub>50</sub> <0.008 µM Taxol control                                                                                                                                | AC CP<br><i>Hypericum perforatum</i> L., L, S, EtOH      | [79]  |
| <b>Acylphloroglucinol</b> | Hyperfol F     | AChE activity                 | <i>In vitro</i>                         | <b>Decreased</b> AChE activity                                | IC <sub>50</sub> = 20.32±0.68 µM vs IC <sub>50</sub> =0.7±0.02nM Tacrine control                                                                                                                                                                    | Alz<br><i>Hypericum perforatum</i> L., AP, MeOH          | [80]  |
| <b>Acylphloroglucinol</b> | Uralione K     | AChE activity                 | <i>In vitro</i>                         | <b>Decreased</b> AChE activity                                | IC <sub>50</sub> = 27.37±1.21 µM vs IC <sub>50</sub> =0.7±0.02nM Tacrine control                                                                                                                                                                    | Alz<br><i>Hypericum perforatum</i> L., AP, MeOH          | [80]  |
| <b>Acylphloroglucinol</b> | Hyperfol A     | Cell viability                | <i>In vitro</i> HEL and K562 cell lines | <b>Decreased</b> cell viability<br><b>Increased</b> apoptosis | IC <sub>50</sub> = 6.19 - 15.01 µM vs IC <sub>50</sub> =0.6 - 0.15µM Adriamycin control                                                                                                                                                             | AC<br><i>Hypericum perforatum</i> L., AP, MeOH           | [81]  |
| <b>Acylphloroglucinol</b> | Hyperuralone E | Cell viability                | <i>In vitro</i> HEL and K562 cell lines | <b>Decreased cell viability</b><br><b>Increased</b> apoptosis | IC <sub>50</sub> = 8.69 - 7.38 µM vs IC <sub>50</sub> =0.6 - 0.15µM Adriamycin control                                                                                                                                                              | AC<br><i>Hypericum perforatum</i> L., AP, MeOH           | [81]  |

| Compound Class     | Compound        | Measurement                            | Method                                                                                                                      | Outcome                                                  |                                                                           | Therapeutic Application | Species, Plant Part and Extract            | Ref # |
|--------------------|-----------------|----------------------------------------|-----------------------------------------------------------------------------------------------------------------------------|----------------------------------------------------------|---------------------------------------------------------------------------|-------------------------|--------------------------------------------|-------|
| Acylphloroglucinol | Hyperforin      | Cell viability, Antimicrobial activity | <i>In vitro</i> <i>Toxoplasma gondii</i> infection model, sulforhodamine B Vero cells cytotoxicity assay                    | Decreased <i>T. gondii</i> growth, inflammatory response |                                                                           | CP, AP                  | <i>Hypericum perforatum</i> L., WP, MeOH   | [82]  |
| Acylphloroglucinol | Hyperformitin A | Cell viability                         | <i>In vitro</i> LPS-induced B lymphocyte proliferation model, <i>In vitro</i> corticosterone induced PC12 cell injury model | Decreased B lymphocyte proliferation                     | IC <sub>50</sub> = 9.7μM vs IC <sub>50</sub> =<1μM cyclosporine A control | CP                      | <i>Hypericum perforatum</i> L., S, L, EtOH | [83]  |
| Acylphloroglucinol | Hyperformitin C | Cell viability                         | <i>In vitro</i> LPS-induced B lymphocyte proliferation                                                                      | Decreased B lymphocyte proliferation                     | IC <sub>50</sub> = 4.3μM vs IC <sub>50</sub> =<1μM cyclosporine A control | CP                      | <i>Hypericum perforatum</i> L., S, L, EtOH | [83]  |
| Acylphloroglucinol | Hyperformitin D | Cell viability                         | <i>In vitro</i> LPS-induced B lymphocyte proliferation                                                                      | Decreased B lymphocyte proliferation                     | IC <sub>50</sub> = 9.3μM vs IC <sub>50</sub> =<1μM cyclosporine A control | CP                      | <i>Hypericum perforatum</i> L., S, L, EtOH | [83]  |
| Acylphloroglucinol | Hyperformitin E | Cell viability                         | <i>In vitro</i> LPS-induced B lymphocyte proliferation                                                                      | Decreased B lymphocyte proliferation                     | IC <sub>50</sub> = 4.1μM vs IC <sub>50</sub> =<1μM cyclosporine A control | CP                      | <i>Hypericum perforatum</i> L., S, L, EtOH | [83]  |

| Compound Class     | Compound        | Measurement    | Method                                                                                                                      | Outcome                                         | Therapeutic Application                                                   | Species, Plant Part and Extract | Ref #                                      |      |
|--------------------|-----------------|----------------|-----------------------------------------------------------------------------------------------------------------------------|-------------------------------------------------|---------------------------------------------------------------------------|---------------------------------|--------------------------------------------|------|
| Acylphloroglucinol | Hyperformitin G | Cell viability | <i>In vitro</i> LPS-induced B lymphocyte proliferation                                                                      | Decreased B lymphocyte proliferation            | IC <sub>50</sub> = 9.2μM vs IC <sub>50</sub> =<1μM cyclosporine A control | CP                              | <i>Hypericum perforatum</i> L., S, L, EtOH | [83] |
| Acylphloroglucinol | Hyperformitin K | Cell viability | <i>In vitro</i> LPS-induced B lymphocyte proliferation                                                                      | Decreased B lymphocyte proliferation            | IC <sub>50</sub> = 8.8μM vs IC <sub>50</sub> =<1μM cyclosporine A control | CP                              | <i>Hypericum perforatum</i> L., S, L, EtOH | [83] |
| Acylphloroglucinol | Hyperformitin L | Cell viability | <i>In vitro</i> LPS-induced B lymphocyte proliferation model, <i>In vitro</i> corticosterone induced PC12 cell injury model | Increased PC12 cell viability                   |                                                                           | CP                              | <i>Hypericum perforatum</i> L., S, L, EtOH | [83] |
| Acylphloroglucinol | Hyperformitin M | Cell viability | <i>In vitro</i> LPS-induced B lymphocyte proliferation model, <i>In vitro</i> corticosterone induced PC12 cell injury model | Increased PC12 cell viability                   |                                                                           | CP                              | <i>Hypericum perforatum</i> L., S, L, EtOH | [83] |
| Acylphloroglucinol | Hyperforone F   | Cell viability | <i>In vivo</i> rat model                                                                                                    | Decreased tau phosphorylation and Aβ production | PP2A and BACE1 gene expression modulation                                 | Alz                             | <i>Hypericum perforatum</i> L., AP, EtOH   | [84] |

| Compound Class     | Compound        | Measurement                                   | Method                                                       | Outcome                                                                    | Therapeutic Application                                                                                                                           | Species, Plant Part and Extract                                   | Ref #                                                                      |      |
|--------------------|-----------------|-----------------------------------------------|--------------------------------------------------------------|----------------------------------------------------------------------------|---------------------------------------------------------------------------------------------------------------------------------------------------|-------------------------------------------------------------------|----------------------------------------------------------------------------|------|
| Acylphloroglucinol | Uliginosin B    | Nociceptive behaviours and motor coordination | <i>In vivo mouse model</i>                                   | Improved antinociceptive and motor coordination scores                     | AN                                                                                                                                                | <i>Hypericum polyanthemum</i> Klotzsch ex Reichardt, AP, n-Hexane | [71]                                                                       |      |
| Acylphloroglucinol | Uliginosin B    | Protozoal susceptibility                      | <i>In vitro Trichomonas vaginalis</i>                        | Decreased <i>T. vaginalis</i> cell viability                               | IC <sub>50</sub> =121.96μM                                                                                                                        | AP                                                                | <i>Hypericum polyanthemum</i> Klotzsch ex Reichardt, AP, Supercritical CO2 | [85] |
| Acylphloroglucinol | Hyperprin A     | Cell proliferation                            | <i>In vitro</i> MV-4-11 cell lines                           | Decreased cell proliferation                                               | IC <sub>50</sub> = 15.35±1.86μM vs IC <sub>50</sub> =9.68±0.86μM CC-90011 control                                                                 | AC                                                                | <i>Hypericum przewalskii</i> Maxim., -, -                                  | [86] |
| Acylphloroglucinol | Uraloidin A     | Oxidative stress                              | <i>In vitro</i> murine peritoneal macrophages                | Decreased LPS-induced NO production                                        |                                                                                                                                                   | CP                                                                | <i>Hypericum pseudohenryi</i> N.Robson, AP, EtOH                           | [87] |
| Acylphloroglucinol | Hyperisampsin A | Cell viability, HIV replication               | <i>In vitro</i> HL-60, SMMC-7721, A-549, MCF-7, SW-480 cells | Decreased cell viability (selective activity)<br>Decreased HIV replication | IC <sub>50</sub> = 28.18 - 10.12μM vs 15.86 - 1.17μM Cysplatin control<br>EC <sub>50</sub> =2.97μM vs IC <sub>50</sub> =0.0014 Zidovudine control | AC<br>AV                                                          | <i>Hypericum sampsonii</i> Hance, AP, EtOH                                 | [88] |
| Acylphloroglucinol | Hyperisampsin B | Cell viability                                | <i>In vitro</i> SMMC-7721, A-549, MCF-7 cells                | Decreased cell viability (selective activity)                              | IC <sub>50</sub> = 39.58 - 27.07μM vs 15.86 - 6.43μM Cysplatin control                                                                            | AC                                                                | <i>Hypericum sampsonii</i> Hance, AP, EtOH                                 | [88] |

| Compound Class            | Compound        | Measurement                     | Method                                                          |                                                                                          | Outcome                                                                                                                                          | Therapeutic Application | Species, Plant Part and Extract               | Ref # |
|---------------------------|-----------------|---------------------------------|-----------------------------------------------------------------|------------------------------------------------------------------------------------------|--------------------------------------------------------------------------------------------------------------------------------------------------|-------------------------|-----------------------------------------------|-------|
| <b>Acylphloroglucinol</b> | Hyperisampsin C | Cell viability                  | <i>In vitro</i><br>HL-60, SMMC-7721, A-549, MCF-7, SW-480 cells | <b>Decreased</b> cell viability (selective toxicity)                                     | IC <sub>50</sub> = 24.49 - 9.49μM vs 15.86 - 1.17μM Cysplatin control                                                                            | AC                      | <i>Hypericum sampsonii</i><br>Hance, AP, EtOH | [88]  |
| <b>Acylphloroglucinol</b> | Hyperisampsin D | Cell viability, HIV replication | <i>In vitro</i><br>HL-60, SMMC-7721, A-549, MCF-7, SW-480 cells | <b>Decreased</b> cell viability (selective toxicity)<br><b>Decreased</b> HIV replication | IC <sub>50</sub> = 15.72 - 5.95μM vs 15.86 - 1.17μM Cysplatin control<br>EC <sub>50</sub> =0.97μM vs IC <sub>50</sub> =0.0014 Zidovudine control | AC<br>AV                | <i>Hypericum sampsonii</i><br>Hance, AP, EtOH | [88]  |
| <b>Acylphloroglucinol</b> | Hyperisampsin E | Cell viability                  | <i>In vitro</i><br>HL-60, SMMC-7721, A-549, MCF-7, SW-480 cells | <b>Decreased</b> cell viability (selective toxicity)                                     | IC <sub>50</sub> = 34.29 - 10.02μM vs 15.86 - 1.17μM Cysplatin control                                                                           | AC                      | <i>Hypericum sampsonii</i><br>Hance, AP, EtOH | [88]  |
| <b>Acylphloroglucinol</b> | Hyperisampsin F | Cell viability                  | <i>In vitro</i><br>HL-60, SMMC-7721, A-549, MCF-7 cells         | <b>Decreased</b> cell viability (selective toxicity)                                     | IC <sub>50</sub> = 31.30 - 13.14μM vs 15.86 - 1.17μM Cysplatin control                                                                           | AC                      | <i>Hypericum sampsonii</i><br>Hance, AP, EtOH | [88]  |
| <b>Acylphloroglucinol</b> | Hyperisampsin G | Cell viability                  | <i>In vitro</i><br>HL-60, SMMC-7721, A-549, MCF-7, SW-480 cells | <b>Decreased</b> cell viability (selective toxicity)                                     | IC <sub>50</sub> = 26.78 - 11.87μM vs 15.86 - 1.17μM Cysplatin control                                                                           | AC                      | <i>Hypericum sampsonii</i><br>Hance, AP, EtOH | [88]  |
| <b>Acylphloroglucinol</b> | Hypersampsone A | Expression modulation           | <i>In vitro</i><br>HepG2/ADR and MCF-7/ADR cancer cell lines    | <b>Decreased</b> multidrug resistance activity                                           |                                                                                                                                                  | IM, AC                  | <i>Hypericum sampsonii</i><br>Hance, -, -     | [89]  |

| Compound Class            | Compound                   | Measurement                                                                                       | Method                                                    | Outcome                                                                                                                         |                                                                                                                                                                                                                        | Therapeutic Application | Species, Plant Part and Extract         | Ref # |
|---------------------------|----------------------------|---------------------------------------------------------------------------------------------------|-----------------------------------------------------------|---------------------------------------------------------------------------------------------------------------------------------|------------------------------------------------------------------------------------------------------------------------------------------------------------------------------------------------------------------------|-------------------------|-----------------------------------------|-------|
| <b>Acylphloroglucinol</b> | Hyperhexanone F            | Expression modulation                                                                             | <i>In vitro</i> HepG2/ADR and MCF-7/ADR cancer cell lines | <b>Decreased</b> multidrug resistance activity                                                                                  |                                                                                                                                                                                                                        | IM, AC                  | <i>Hypericum sampsonii</i> Hance, -, -  | [89]  |
| <b>Acylphloroglucinol</b> | Hypermongone C             | Fibroblast migration and proliferation<br>Endothelial cells tube formation<br>Cytokine expression | <i>In vitro</i> HUVEC, HDF cells                          | <b>Increased</b> fibroblast proliferation and migration, angiogenesis<br><b>Decreased</b> pro-inflammatory cytokines expression | <b>Decreased</b> IL-6 and TNF $\alpha$ expression<br><b>Increased</b> VEGF growth factor production                                                                                                                    | S                       | <i>Hypericum scabrum</i> L., AP, Hexane | [90]  |
| <b>Acylphloroglucinol</b> | <i>Hypericumoxides</i> A-N | Cell viability<br>Serotonin reuptake                                                              | <i>In vitro</i> HL-7702 cells                             | <b>Decreased</b> serotonin reuptake<br><b>Increased</b> cell viability                                                          | <b>Increased</b> cell survival rate 64- 65% ( <i>Hypericumoxide</i> D, M) vs 74% bicyclol control<br><b>Decreased</b> Serotonin reuptake 30.9-51.0% ( <i>Hypericumoxide</i> A-E, G-I, M-N) vs 94.7% duloxetine control | AD, CP                  | <i>Hypericum scabrum</i> L., AP, EtOH   | [91]  |
| <b>Acylphloroglucinol</b> | Hypercohin B               | Cell viability                                                                                    | <i>In vitro</i> HL-7702 cells                             | <b>Increased</b> cell viability<br><b>Decreased</b> cell damage                                                                 | <b>Increased</b> cell survival rate 65% ( <i>Hypericumoxide</i> D, M) vs 74% bicyclol control                                                                                                                          | CP                      | <i>Hypericum scabrum</i> L., AP, EtOH   | [91]  |
| <b>Acylphloroglucinol</b> | Hyperibrin G               | Cell viability                                                                                    | <i>In vitro</i> HepG2 cells                               | <b>Increased</b> cell viability                                                                                                 | Cell viability (%): 56.53 $\pm$ 4.74% vs 54.8 $\pm$ 1.99% Bicyclol control                                                                                                                                             | CP                      | <i>Hypericum scabrum</i> L., AP, EtOH   | [92]  |

| Compound Class            | Compound                                                                         | Measurement    | Method                                  |                                 | Outcome                                                                                                                                         | Therapeutic Application | Species, Plant Part and Extract       | Ref # |
|---------------------------|----------------------------------------------------------------------------------|----------------|-----------------------------------------|---------------------------------|-------------------------------------------------------------------------------------------------------------------------------------------------|-------------------------|---------------------------------------|-------|
| <b>Acylphloroglucinol</b> | (2R,4R,6S)-2-benzoyl-3,3-dimethyl-4,6-bis(3-methylbut-2-en-1-yl)cyclohexan-1-one | Cell viability | <i>In vitro</i><br>HepG2 cells          | <b>Increased</b> cell viability | Cell viability (%):<br>61.96±1.83% vs<br>54.8±1.99% Bicyclol control                                                                            | CP                      | <i>Hypericum scabrum</i> L., AP, EtOH | [92]  |
| <b>Acylphloroglucinol</b> | Sampsonione N                                                                    | Cell viability | <i>In vitro</i><br>HepG2 cells          | <b>Increased</b> cell viability | Cell viability (%):<br>59.97±1.07% vs<br>54.8±1.99% Bicyclol control                                                                            | CP                      | <i>Hypericum scabrum</i> L., AP, EtOH | [92]  |
| <b>Acylphloroglucinol</b> | 7-epiclusianone                                                                  | Cell viability | <i>In vitro</i><br>HepG2 cells          | <b>Increased</b> cell viability | Cell viability (%):<br>58.62±3.28% vs<br>54.8±1.99% Bicyclol control                                                                            | CP                      | <i>Hypericum scabrum</i> L., AP, EtOH | [92]  |
| <b>Acylphloroglucinol</b> | Hyperibrins A                                                                    | Cell viability | <i>In vitro</i><br>SK-N-SH cells        | <b>Increased</b> cell viability | SK-N-SH cell viability<br>71.2±3.5 % vs<br>72.6±1.5% Resveratrol control                                                                        | CP                      | <i>Hypericum scabrum</i> L., AP, EtOH | [93]  |
| <b>Acylphloroglucinol</b> | Hyperibrins C                                                                    | Cell viability | <i>In vitro</i><br>SK-N-SH, HepG2 cells | <b>Increased</b> cell viability | SK-N-SH cell viability<br>81.3±4.2 % vs<br>72.6±1.5% Resveratrol control<br>HepG2 cell viability<br>36.0±2.1 % vs<br>43.2±2.4% Bicyclol control | CP                      | <i>Hypericum scabrum</i> L., AP, EtOH | [93]  |



| Compound Class            | Compound        | Measurement    | Method                                  |                                 | Outcome                                                                                                                                         | Therapeutic Application | Species, Plant Part and Extract       | Ref # |
|---------------------------|-----------------|----------------|-----------------------------------------|---------------------------------|-------------------------------------------------------------------------------------------------------------------------------------------------|-------------------------|---------------------------------------|-------|
| <b>Acylphloroglucinol</b> | Hyperibrins D   | Cell viability | <i>In vitro</i><br>SK-N-SH, HepG2 cells | <b>Increased</b> cell viability | SK-N-SH cell viability<br>71.3±0.3 % vs<br>72.6±1.5% Resveratrol control<br>HepG2 cell viability<br>35.2±3.6 % vs<br>43.2±2.4% Bicyclol control | CP                      | <i>Hypericum scabrum</i> L., AP, EtOH | [93]  |
| <b>Acylphloroglucinol</b> | Hyperscabrone C | Cell viability | <i>In vitro</i><br>HepG2 cells          | <b>Increased</b> cell viability | HepG2 cell viability<br>33.7±1.1 % vs<br>43.2±2.4% Bicyclol control                                                                             | CP                      | <i>Hypericum scabrum</i> L., AP, EtOH | [94]  |
| <b>Acylphloroglucinol</b> | Hyperscabrone D | Cell viability | <i>In vitro</i><br>SK-N-SH, HepG2 cells | <b>Increased</b> cell viability | SK-N-SH cell viability<br>70.8±0.5 % vs<br>72.6±1.5% Resveratrol control<br>HepG2 cell viability<br>47.0±5.4 % vs<br>43.2±2.4% Bicyclol control | CP                      | <i>Hypericum scabrum</i> L., AP, EtOH | [94]  |
| <b>Acylphloroglucinol</b> | Hyperscabrone E | Cell viability | <i>In vitro</i><br>SK-N-SH cells        | <b>Increased</b> cell viability | SK-N-SH cell viability<br>73.1±3.7 % vs<br>72.6±1.5% Resveratrol control                                                                        | CP                      | <i>Hypericum scabrum</i> L., AP, EtOH | [94]  |
| <b>Acylphloroglucinol</b> | Hyperscabrone F | Cell viability | <i>In vitro</i><br>SK-N-SH cells        | <b>Increased</b> cell viability | SK-N-SH cell viability<br>73.5±2.9 % vs<br>72.6±1.5% Resveratrol control                                                                        | CP                      | <i>Hypericum scabrum</i> L., AP, EtOH | [94]  |

| Compound Class            | Compound                           | Measurement    | Method                                  |                                 | Outcome                                                                                                                                         | Therapeutic Application | Species, Plant Part and Extract       | Ref # |
|---------------------------|------------------------------------|----------------|-----------------------------------------|---------------------------------|-------------------------------------------------------------------------------------------------------------------------------------------------|-------------------------|---------------------------------------|-------|
| <b>Acylphloroglucinol</b> | Hyperscabrone G                    | Cell viability | <i>In vitro</i><br>SK-N-SH, HepG2 cells | <b>Increased</b> cell viability | SK-N-SH cell viability<br>72.1±2.3 % vs<br>72.6±1.5% Resveratrol control<br>HepG2 cell viability<br>55.3±2.1 % vs<br>43.2±2.4% Bicyclol control | CP                      | <i>Hypericum scabrum</i> L., AP, EtOH | [94]  |
| <b>Acylphloroglucinol</b> | Hyperscabrone I                    | Cell viability | <i>In vitro</i><br>HepG2 cells          | <b>Increased</b> cell viability | HepG2 cell viability<br>50.9±3.6 % vs<br>43.2±2.4% Bicyclol control                                                                             | CP                      | <i>Hypericum scabrum</i> L., AP, EtOH | [94]  |
| <b>Acylphloroglucinol</b> | Hyperibone J                       | Cell viability | <i>In vitro</i><br>HepG2 cells          | <b>Increased</b> cell viability | HepG2 cell viability<br>47.6±2.1 % vs<br>43.2±2.4% Bicyclol control                                                                             | CP                      | <i>Hypericum scabrum</i> L., AP, EtOH | [94]  |
| <b>Acylphloroglucinol</b> | 8-hydroxyhyperforin 8,1-hemiacetal | Cell viability | <i>In vitro</i><br>HepG2 cells          | <b>Increased</b> cell viability | HepG2 cell viability<br>39.3±3.8 % vs<br>43.2±2.4% Bicyclol control                                                                             | CP                      | <i>Hypericum scabrum</i> L., AP, EtOH | [94]  |
| <b>Acylphloroglucinol</b> | hypermongone G                     | Cell viability | <i>In vitro</i><br>SK-N-SH cells        | <b>Increased</b> cell viability | SK-N-SH cell viability<br>71.6±4.7 % vs<br>72.6±1.5% Resveratrol control                                                                        | CP                      | <i>Hypericum scabrum</i> L., AP, EtOH | [94]  |
| <b>Acylphloroglucinol</b> | hypermongone H                     | Cell viability | <i>In vitro</i><br>HepG2 cells          | <b>Increased</b> cell viability | HepG2 cell viability<br>45.8±1.9 % vs<br>43.2±2.4% Bicyclol control                                                                             | CP                      | <i>Hypericum scabrum</i> L., AP, EtOH | [94]  |

| Compound Class            | Compound        | Measurement    | Method                                  |                                 | Outcome                                                                                                                                         | Therapeutic Application | Species, Plant Part and Extract       | Ref # |
|---------------------------|-----------------|----------------|-----------------------------------------|---------------------------------|-------------------------------------------------------------------------------------------------------------------------------------------------|-------------------------|---------------------------------------|-------|
| <b>Acylphloroglucinol</b> | hyperibone A    | Cell viability | <i>In vitro</i><br>SK-N-SH cells        | <b>Increased</b> cell viability | SK-N-SH cell viability<br>83.0±3.6 % vs<br>72.6±1.5% Resveratrol control                                                                        | CP                      | <i>Hypericum scabrum</i> L., AP, EtOH | [94]  |
| <b>Acylphloroglucinol</b> | hyperibone B    | Cell viability | <i>In vitro</i><br>HepG2 cells          | <b>Increased</b> cell viability | HepG2 cell viability<br>36.7±2.9 % vs<br>43.2±2.4% Bicyclol control                                                                             | CP                      | <i>Hypericum scabrum</i> L., AP, EtOH | [94]  |
| <b>Acylphloroglucinol</b> | hypermongone D  | Cell viability | <i>In vitro</i><br>SK-N-SH cells        | <b>Increased</b> cell viability | SK-N-SH cell viability<br>75.4±4.2 % vs<br>72.6±1.5% Resveratrol control                                                                        | CP                      | <i>Hypericum scabrum</i> L., AP, EtOH | [94]  |
| <b>Acylphloroglucinol</b> | yezo'otogirin C | Cell viability | <i>In vitro</i><br>HepG2 cells          | <b>Increased</b> cell viability | HepG2 cell viability<br>40.6±5.3 % vs<br>43.2±2.4% Bicyclol control                                                                             | CP                      | <i>Hypericum scabrum</i> L., AP, EtOH | [94]  |
| <b>Acylphloroglucinol</b> | hyperibone K    | Cell viability | <i>In vitro</i><br>SK-N-SH, HepG2 cells | <b>Increased</b> cell viability | SK-N-SH cell viability<br>73.1±1.8 % vs<br>72.6±1.5% Resveratrol control<br>HepG2 cell viability<br>64.0±8.0 % vs<br>43.2±2.4% Bicyclol control | CP                      | <i>Hypericum scabrum</i> L., AP, EtOH | [94]  |

| Compound Class            | Compound         | Measurement                            | Method                                                                                                                       | Outcome                                                                              | Therapeutic Application                                                                                                                                                                                                                                     | Species, Plant Part and Extract           | Ref # |
|---------------------------|------------------|----------------------------------------|------------------------------------------------------------------------------------------------------------------------------|--------------------------------------------------------------------------------------|-------------------------------------------------------------------------------------------------------------------------------------------------------------------------------------------------------------------------------------------------------------|-------------------------------------------|-------|
| <b>Acylphloroglucinol</b> | Unnamed compound | Antimicrobial activity, cell viability | <i>In vitro</i><br><i>Trypanosoma brucei</i><br><i>rhodesiense</i> ,<br><i>Plasmodium falciparum</i> ; L6 rat mioblast cells | <b>Decreased</b><br>protozoal activity;<br>L6 cell viability                         | AM                                                                                                                                                                                                                                                          | <i>Hypericum scabrum</i> L., AP, n-Hexane | [95]  |
| <b>Acylphloroglucinol</b> | Hyperforin       | Cell viability, Oxidative stress       | <i>In vitro</i><br>PC12, SH-SY5Y cells                                                                                       | <b>Increased</b> PC12 cell viability<br><b>Decreased</b> apoptosis, oxidative stress | CP<br><b>Decreased:</b> LDH, ROS, MDA - vs Aluminum control<br><b>Increased:</b> SOD, GSH-Px - vs Aluminum control<br><b>Suppressed:</b> Aluminum induced MMP reduction, Cytochrome C release, Caspase-3 activation, Bcl-2 downregulation, Bax upregulation | <i>Hypericum</i> spp., -, -               | [96]  |
| <b>Acylphloroglucinol</b> | Japonicin A      | Cell proliferation                     | <i>In vitro</i><br>HaCaT, MRC5 and MSC                                                                                       | <b>Increased</b> HaCaT proliferation                                                 | S<br>5 $\mu$ M (110% vs blank control)                                                                                                                                                                                                                      | <i>Hypericum</i> spp., AP, n-Hexane       | [97]  |

| Compound Class            | Compound     | Measurement                                                      | Method                                 | Outcome                                                                          | Therapeutic Application                                                                                                                                                                                                        | Species, Plant Part and Extract          | Ref # |
|---------------------------|--------------|------------------------------------------------------------------|----------------------------------------|----------------------------------------------------------------------------------|--------------------------------------------------------------------------------------------------------------------------------------------------------------------------------------------------------------------------------|------------------------------------------|-------|
| <b>Acylphloroglucinol</b> | Uliginosin B | Cell proliferation                                               | <i>In vitro</i><br>HaCaT, MRC5 and MSC | <b>Increased</b> MSC and MRC5 cell viability                                     | 5 $\mu$ M (116% vs blank control) MSC cells<br>10 $\mu$ M (129% vs blank control) MSC cells<br>1 $\mu$ M (125% vs blank control) MRC5<br>5 $\mu$ M (152.5% vs blank control) MRC5<br>10 $\mu$ M (151.1% vs blank control) MRC5 | S<br><i>Hypericum</i> spp., AP, n-Hexane | [97]  |
| <b>Acylphloroglucinol</b> | Hyperforin   | Expression modulation<br>Microglial activation<br>Infarct volume | <i>In vivo</i><br>Ischemic Mouse model | <b>Reduced</b> infarct volume<br><b>Inhibited</b> IL-17A activation of microglia | <b>Decreased</b> mRNA and protein expression, round microglia, CD16, CD11b, CD32, iNOS, TNF $\alpha$<br><b>Increased</b> IL10, Arg-1, TGF $\beta$ , CD206, YM1, ramified microglia vs saline solution                          | CP<br><i>Hypericum</i> spp., -, -        | [98]  |
| <b>Acylphloroglucinol</b> | Hyperforin   | JAK1 activity                                                    | <i>In vitro</i>                        | <b>Decreased</b> JAK1 activity                                                   | AI                                                                                                                                                                                                                             | <i>Hypericum</i> spp., -, -              | [99]  |
| <b>Acylphloroglucinol</b> | Hyperforin   | STAT-1 and NF- $\kappa$ B activity                               | <i>In vitro</i><br>INS-1E cells        | <b>Decreased</b> cytokine induced apoptosis                                      | <b>Decreased</b> cytokine induced STAT-1 activation                                                                                                                                                                            | ADb<br><i>Hypericum</i> spp., -, -       | [100] |
| <b>Acylphloroglucinol</b> | Hyperforin   | Cell viability, Genotoxicity                                     | <i>In vitro</i><br>HepG2 cells         | <b>Decreased</b> HepG2 viability; gene mutations; DNA damage                     | Antigenotoxicity against zeocin                                                                                                                                                                                                | AC<br>CP<br><i>Hypericum</i> spp., -, -  | [19]  |

| Compound Class            | Compound   | Measurement                                                        | Method                        | Outcome                                                                                                                   |                                                                                                                                                                                                                                                                                      | Therapeutic Application | Species, Plant Part and Extract | Ref # |
|---------------------------|------------|--------------------------------------------------------------------|-------------------------------|---------------------------------------------------------------------------------------------------------------------------|--------------------------------------------------------------------------------------------------------------------------------------------------------------------------------------------------------------------------------------------------------------------------------------|-------------------------|---------------------------------|-------|
| <b>Acylphloroglucinol</b> | Hyperforin | Al-induced $\beta$ -amyloid formation and tau hyperphosphorylation | <i>In vitro</i> PC12 cells    | <b>Decreased</b> $\beta$ -amyloid formation                                                                               | <b>Decreased</b> APP, BACE1, PS1 expression<br><b>Increased</b> sAPP $\alpha$ , ADAM9/10/17 expression, Tau phosphorylation, GSK-3 $\beta$ phosphorylation                                                                                                                           | Alz                     | <i>Hypericum</i> spp., -, -     | [101] |
| <b>Acylphloroglucinol</b> | Hyperforin | Cell viability CYP1A2 and CYP2D6 expression                        | <i>In vitro</i> WRL-68, HepG2 | <b>Increased</b> CYP1A2 (HepG2, WRL-68), CYP2D6 (HepG2) expression<br><b>Decreased</b> CYP2D6 (HepaRG, WRL-68) expression |                                                                                                                                                                                                                                                                                      | Int                     | <i>Hypericum</i> spp., -, -     | [102] |
| <b>Acylphloroglucinol</b> | Hyperforin | STAT-1 and NF- $\kappa$ B activity                                 | <i>In vitro</i> INS-1E cells  | <b>Decreased</b> cytokine induced apoptosis, expression of pro-inflammatory genes, insulin release suppression            | <b>Decreased</b> cytokine induced STAT-1, NF- $\kappa$ B p65 subunit, IKK, MAPK activation<br><b>Decreased</b> cytokine induced CXCL9, CXCL10, MHC II, ICAM1, COX2, BH3, Bak, CHOP, PTPN2 expression<br><b>Decreased</b> Pdx1, Nkx2.2, Nkx6.1, Bcl-2 cytokine induced downregulation | ADb                     | <i>Hypericum</i> spp., -, -     | [103] |
| <b>Acylphloroglucinol</b> | Hyperforin | Cell proliferation                                                 | <i>In vivo</i> mouse model    | <b>Decreased</b> autoimmune encephalomyelitis severity                                                                    | <b>Decreased</b> T-cell proliferation, demyelination                                                                                                                                                                                                                                 | CP                      | <i>Hypericum</i> spp., -, -     | [104] |

| Compound Class            | Compound   | Measurement           | Method                                           | Outcome                                                                                                                                                       |                                                                                                                                                  | Therapeutic Application | Species, Plant Part and Extract | Ref # |
|---------------------------|------------|-----------------------|--------------------------------------------------|---------------------------------------------------------------------------------------------------------------------------------------------------------------|--------------------------------------------------------------------------------------------------------------------------------------------------|-------------------------|---------------------------------|-------|
| <b>Acylphloroglucinol</b> | Hyperforin | Wound healing         | <i>In vitro</i><br>HaCaT keratinocyte cells      | <b>Improved</b> wound healing                                                                                                                                 | <b>Increased</b> intracellular Ca <sup>2+</sup> , ATP release, TRPC6 expression                                                                  | S                       | <i>Hypericum</i> spp., -, -     | [105] |
| <b>Acylphloroglucinol</b> | Hyperforin | Expression modulation | <i>In vitro</i><br>Human and rat $\beta$ -cells  | <b>Decreased</b> cytokine induced insulin release suppression, pro-inflammatory genes expression, nitrites production, apoptosis, STAT-1 and NF-kB activation | <b>Decreased</b> iNOS, CXCL9, CXCL10, COX2, NO expression                                                                                        | ADb                     | <i>Hypericum</i> spp., -, -     | [106] |
| <b>Acylphloroglucinol</b> | Hyperforin | Expression modulation | <i>In vitro, Ex vivo</i>                         | Tissue specific TRPC6 activation                                                                                                                              | <b>Increased</b> TrkB, p-TrkB, CREB, p-CREB expression                                                                                           | CP                      | <i>Hypericum</i> spp., -, -     | [107] |
| <b>Acylphloroglucinol</b> | Hyperforin | Cell Viability        | <i>Ex vivo</i><br>MEC-1 cells                    | <b>Increased</b> apoptosis                                                                                                                                    | <b>Increased</b> Noxa expression, Mcl-1/Bak complex dissociation, Bak activation, Noxa/Mcl-1 association<br><b>Decreased</b> Proteasome activity | AC                      | <i>Hypericum</i> spp., -, -     | [22]  |
| <b>Acylphloroglucinol</b> | Hyperforin | Cell maturation       | <i>In vitro/ Ex vivo</i><br>Central glia-4 cells | <b>Increases</b> oligodendrocytes maturation, mitochondrial function of differentiating CG-4 cells and NS/PCs                                                 | <b>Decreased</b> mitochondrial toxin induced cytotoxicity, CG-4 rotenone induced ATP depletion                                                   | AD                      | <i>Hypericum</i> spp., -, -     | [108] |

| Compound Class            | Compound                 | Measurement                                        | Method                                                                     |                                                                                    | Outcome                                                                                                                                                                                                                                               | Therapeutic Application | Species, Plant Part and Extract                | Ref # |
|---------------------------|--------------------------|----------------------------------------------------|----------------------------------------------------------------------------|------------------------------------------------------------------------------------|-------------------------------------------------------------------------------------------------------------------------------------------------------------------------------------------------------------------------------------------------------|-------------------------|------------------------------------------------|-------|
| <b>Acylphloroglucinol</b> | Hyperforin               | Cell viability                                     | <i>In vitro</i> K562 cells                                                 | <b>Decreased</b> cell viability<br><b>Increased</b> apoptosis                      | <b>Decreased</b> mitochondrial transmembrane potential<br><b>Increased</b> Cytochrome C, Casp-3, Casp-8, Casp-9 activation, PARP cleavage                                                                                                             | AC                      | <i>Hypericum</i> spp., -, -                    | [24]  |
| <b>Acylphloroglucinol</b> | Tetrahydrohyperforin (d) | A $\beta$ neurotoxicity and behavioral impairments | <i>In vitro</i> H4 neuroglioma cells<br><i>Ex vivo/in vivo</i> mouse model | <b>Improved</b> memory and <b>decreased</b> synaptic plasticity ( <i>in vivo</i> ) | <b>Decreased</b> tau hyperphosphorylation, astrogliosis, total fibrillar/oligomeric forms of A $\beta$ , long term potentiation, inactive GSK-3 $\beta$ ( <i>in vivo</i> )<br><b>Decreased</b> A $\beta$ precursor protein proteolysis, AICDy levels; | Alz                     | <i>Hypericum</i> spp., -, -                    | [109] |
| <b>Acylphloroglucinol</b> | Hypersubone A            | Cell viability                                     | <i>In vitro</i> HepG2, Eca109, HeLa and A549 cells                         | <b>Decreased</b> cell viability (selective activity)                               | IC <sub>50</sub> = >50 - 17.74 $\mu$ M vs IC <sub>50</sub> = 21.02 - 8.04 $\mu$ M etoposide control                                                                                                                                                   | AC                      | <i>Hypericum subsessile</i> N.Robson, AP, MeOH | [110] |
| <b>Acylphloroglucinol</b> | Hypersubone B            | Cell viability                                     | <i>In vitro</i> HepG2, Eca109, HeLa and A549 cells                         | <b>Decreased</b> cell viability (selective activity)                               | IC <sub>50</sub> = 7.52 - 0.07 $\mu$ M vs IC <sub>50</sub> = 21.02 - 8.04 $\mu$ M etoposide control                                                                                                                                                   | AC                      | <i>Hypericum subsessile</i> N.Robson, AP, MeOH | [110] |
| <b>Acylphloroglucinol</b> | Hypersubone C            | Cell viability                                     | <i>In vitro</i> HepG2, Eca109, HeLa and A549 cells                         | <b>Decreased</b> cell viability (selective activity)                               | IC <sub>50</sub> = 17.23 - 6.71 $\mu$ M vs IC <sub>50</sub> = 21.02 - 8.04 $\mu$ M etoposide control                                                                                                                                                  | AC                      | <i>Hypericum subsessile</i> N.Robson, AP, MeOH | [110] |



| Compound Class            | Compound        | Measurement    | Method                       |                                                     | Outcome                                                                                                                     | Therapeutic Application | Species, Plant Part and Extract                                 | Ref # |
|---------------------------|-----------------|----------------|------------------------------|-----------------------------------------------------|-----------------------------------------------------------------------------------------------------------------------------|-------------------------|-----------------------------------------------------------------|-------|
| <b>Acylphloroglucinol</b> | Hypersubone D   | Adipogenesis   | <i>In vitro</i> 3T3-L1 cells | <b>Decreased</b> lipid acumulation in preadipocytes | Significant effect vs LiCl control                                                                                          | Ad.In                   | <i>Hypericum subsessile</i><br>N.Robson, AP, MeOH               | [111] |
| <b>Acylphloroglucinol</b> | Hypersubone E   | Adipogenesis   | <i>In vitro</i> 3T3-L1 cells | <b>Decreased</b> lipid acumulation in preadipocytes | Significant effect vs LiCl control                                                                                          | Ad.In                   | <i>Hypericum subsessile</i><br>N.Robson, AP, MeOH               | [111] |
| <b>Acylphloroglucinol</b> | Hypersubone H   | Adipogenesis   | <i>In vitro</i> 3T3-L1 cells | <b>Decreased</b> lipid acumulation in preadipocytes | Significant effect vs LiCl control                                                                                          | Ad.In                   | <i>Hypericum subsessile</i><br>N.Robson, AP, MeOH               | [111] |
| <b>Acylphloroglucinol</b> | Hypersampsone P | Adipogenesis   | <i>In vitro</i> 3T3-L1 cells | <b>Decreased</b> adipocyte differentiation          | <b>Decreased</b> PPAR $\gamma$ and FABP4 expression                                                                         | Ad.In                   | <i>Hypericum subsessile</i><br>N.Robson, -, -                   | [112] |
| <b>Acylphloroglucinol</b> | Uralione A      | Cell viability | <i>In vitro</i> PC12 cells   | <b>Increased</b> cell viability                     | Cell viability :<br>61.4 $\pm$ 1.07% -<br>91.5 $\pm$ 0.39% vs<br>59.1 $\pm$ 0.12% - 77.7 $\pm$ 0.31<br>% fluoxetine control | CP                      | <i>Hypericum uralum</i> Buch.-<br>Ham. ex<br>D.Don, WP,<br>EtOH | [113] |
| <b>Acylphloroglucinol</b> | Uralione B      | Cell viability | <i>In vitro</i> PC12 cells   | <b>Increased</b> cell viability                     | Cell viability :<br>65.9 $\pm$ 0.68% -<br>80.8 $\pm$ 0.17% vs<br>59.1 $\pm$ 0.12% - 77.7 $\pm$ 0.31<br>% fluoxetine control | CP                      | <i>Hypericum uralum</i> Buch.-<br>Ham. ex<br>D.Don, WP,<br>EtOH | [113] |

| Compound Class            | Compound   | Measurement    | Method                        |                                 | Outcome                                                                                             | Therapeutic Application | Species, Plant Part and Extract                                 | Ref # |
|---------------------------|------------|----------------|-------------------------------|---------------------------------|-----------------------------------------------------------------------------------------------------|-------------------------|-----------------------------------------------------------------|-------|
| <b>Acylphloroglucinol</b> | Uralione C | Cell viability | <i>In vitro</i><br>PC12 cells | <b>Increased</b> cell viability | Cell viability :<br>68.9±0.15% -<br>86.8±0.20% vs<br>59.1±0.12% - 77.7±0.31<br>% fluoxetine control | CP                      | <i>Hypericum uralum</i> Buch.-<br>Ham. ex<br>D.Don, WP,<br>EtOH | [113] |
| <b>Acylphloroglucinol</b> | Uralione D | Cell viability | <i>In vitro</i><br>PC12 cells | <b>Increased</b> cell viability | Cell viability :<br>72.5±0.43% -<br>80.9±0.32% vs<br>59.1±0.12% - 77.7±0.31<br>% fluoxetine control | CP                      | <i>Hypericum uralum</i> Buch.-<br>Ham. ex<br>D.Don, WP,<br>EtOH | [113] |
| <b>Acylphloroglucinol</b> | Uralione E | Cell viability | <i>In vitro</i><br>PC12 cells | <b>Increased</b> cell viability | Cell viability :<br>68.1±0.39% -<br>86.6±0.36% vs<br>59.1±0.12% - 77.7±0.31<br>% fluoxetine control | CP                      | <i>Hypericum uralum</i> Buch.-<br>Ham. ex<br>D.Don, WP,<br>EtOH | [113] |
| <b>Acylphloroglucinol</b> | Uralione F | Cell viability | <i>In vitro</i><br>PC12 cells | <b>Increased</b> cell viability | Cell viability :<br>74.1±0.72% -<br>81.8±0.40% vs<br>59.1±0.12% - 77.7±0.31<br>% fluoxetine control | CP                      | <i>Hypericum uralum</i> Buch.-<br>Ham. ex<br>D.Don, WP,<br>EtOH | [113] |
| <b>Acylphloroglucinol</b> | Uralione G | Cell viability | <i>In vitro</i><br>PC12 cells | <b>Increased</b> cell viability | Cell viability :<br>68.1±0.44% -<br>78.6±0.29% vs<br>59.1±0.12% - 77.7±0.31<br>% fluoxetine control | CP                      | <i>Hypericum uralum</i> Buch.-<br>Ham. ex<br>D.Don, WP,<br>EtOH | [113] |
| <b>Acylphloroglucinol</b> | Uralione H | Cell viability | <i>In vitro</i><br>PC12 cells | <b>Increased</b> cell viability | Cell viability :<br>81.6±0.20% -<br>84.2±0.24% vs<br>59.1±0.12% - 77.7±0.31<br>% fluoxetine control | CP                      | <i>Hypericum uralum</i> Buch.-<br>Ham. ex<br>D.Don, WP,<br>EtOH | [113] |

| Compound Class            | Compound       | Measurement                                 | Method                           |                                                                       | Outcome                                                                                             | Therapeutic Application | Species, Plant Part and Extract                                 | Ref # |
|---------------------------|----------------|---------------------------------------------|----------------------------------|-----------------------------------------------------------------------|-----------------------------------------------------------------------------------------------------|-------------------------|-----------------------------------------------------------------|-------|
| <b>Acylphloroglucinol</b> | Uralione J     | Cell viability                              | <i>In vitro</i><br>PC12 cells    | <b>Increased</b> cell viability                                       | Cell viability :<br>72.9±0.43% -<br>93.5±0.14% vs<br>59.1±0.12% - 77.7±0.31<br>% fluoxetine control | CP                      | <i>Hypericum uralum</i> Buch.-<br>Ham. ex<br>D.Don, WP,<br>EtOH | [113] |
| <b>Acylphloroglucinol</b> | Uralione K     | Cell viability                              | <i>In vitro</i><br>PC12 cells    | <b>Increased</b> cell viability                                       | Cell viability :<br>71.5±0.75% -<br>81.1±0.12% vs<br>59.1±0.12% - 77.7±0.31<br>% fluoxetine control | CP                      | <i>Hypericum uralum</i> Buch.-<br>Ham. ex<br>D.Don, WP,<br>EtOH | [113] |
| <b>Acylphloroglucinol</b> | Uralodin A     | Stress-induced learning and memory deficits | <i>In vivo</i> mouse model       | <b>Decreased</b> immobility time in FST and TST vs fluoxetine control |                                                                                                     | AD                      | <i>Hypericum uralum</i> Buch.-<br>Ham. ex<br>D.Don, WP,<br>EtOH | [113] |
| <b>Acylphloroglucinol</b> | Hyperuralone C | AChE activity                               | <i>In vitro</i>                  | AChE inhibition                                                       | IC <sub>50</sub> = 9.6 µM                                                                           | Alz                     | <i>Hypericum uralum</i> Buch.-<br>Ham. ex<br>D.Don, AP,<br>MeOH | [114] |
| <b>Acylphloroglucinol</b> | Hyperuralone D | AChE activity                               | <i>In vitro</i>                  | AChE inhibition                                                       | IC <sub>50</sub> = 7.1 µM                                                                           | Alz                     | <i>Hypericum uralum</i> Buch.-<br>Ham. ex<br>D.Don, AP,<br>MeOH | [114] |
| <b>Acylphloroglucinol</b> | Uralin D       | Cell viability                              | <i>In vitro</i> Huvec cell lines | <b>Decreased</b> cell viability                                       | IC <sub>50</sub> = 26.3µM                                                                           | AC                      | <i>Hypericum uralum</i> Buch.-<br>Ham. ex<br>D.Don, AP,<br>EtOH | [115] |

| Compound Class     | Compound        | Measurement                     | Method                                  | Outcome                                                                     | Therapeutic Application                                | Species, Plant Part and Extract | Ref #                                                 |       |
|--------------------|-----------------|---------------------------------|-----------------------------------------|-----------------------------------------------------------------------------|--------------------------------------------------------|---------------------------------|-------------------------------------------------------|-------|
| Acylphloroglucinol | Hyperlagarin C  | Cell viability                  | <i>In vitro</i> Huvec cell lines        | Decreased cell viability                                                    | IC <sub>50</sub> = 31.1μM                              | AC                              | <i>Hypericum uralum</i> Buch.-Ham. ex D.Don, AP, EtOH | [115] |
| Acylphloroglucinol | Hyperlagarin A  | Cell viability                  | <i>In vitro</i> Huvec cell lines        | Decreased cell viability                                                    | IC <sub>50</sub> = 21.9μM                              | AC                              | <i>Hypericum uralum</i> Buch.-Ham. ex D.Don, AP, EtOH | [115] |
| Acylphloroglucinol | Furohyperforin  | Cell viability,Oxidative stress | <i>In vitro</i> Huvec cell lines        | Decreased glucose induced cell damage<br>Increased cell viability           | Cell viability increase 57.2% vs 33.0% aspirin control | CP                              | <i>Hypericum uralum</i> Buch.-Ham. ex D.Don, AP, EtOH | [115] |
| Acylphloroglucinol | Oxepahyperforin | Cell viability,Oxidative stress | <i>In vitro</i> Huvec cell lines        | Decreased glucose induced cell damage<br>Increased cell viability           | Cell viability increase 58.0% vs 33.0% aspirin control | CP                              | <i>Hypericum uralum</i> Buch.-Ham. ex D.Don, AP, EtOH | [115] |
| Acylphloroglucinol | Hyphenrone T    | Cell viability,Oxidative stress | <i>In vitro</i> Huvec cell lines        | Decreased glucose induced cell damage<br>Increased cell viability           | Cell viability increase 55.3% vs 33.0% aspirin control | CP                              | <i>Hypericum uralum</i> Buch.-Ham. ex D.Don, AP, EtOH | [115] |
| Acylphloroglucinol | Hypersonin A    | Cell proliferation              | <i>In vitro</i> mouse splenocytes model | Decreased anti-CD3/anti-CD28 monoclonal antibody induced cell proliferation |                                                        | IM                              | <i>Hypericum wilsonii</i> N. Robson, S, L, EtOH       | [116] |

| Compound Class     | Compound          | Measurement                    | Method                                      | Outcome                                                                                                        | Therapeutic Application                                                               | Species, Plant Part and Extract | Ref #                                    |       |
|--------------------|-------------------|--------------------------------|---------------------------------------------|----------------------------------------------------------------------------------------------------------------|---------------------------------------------------------------------------------------|---------------------------------|------------------------------------------|-------|
| Acylphloroglucinol | Hyperwilsonsone I | NO production, gene expression | In vitro RAW264.7 cell lines                | Decreased LPS induced NO production<br>Decreased NF-κB p65 expression and proinflammatory cytokines production | IC <sub>50</sub> = 9.12±0.47μM vs IC <sub>50</sub> =5.50±0.36μM dexamethasone control | CP                              | Hypericum wilsonii N. Robson, S, L, EtOH | [117] |
| Acylphloroglucinol | Hyperwilsonsone J | NO production, gene expression | In vitro RAW264.7 cell lines                | Decreased LPS induced NO production<br>Decreased NF-κB p65 expression and proinflammatory cytokines production | IC <sub>50</sub> = 6.15±0.11μM vs IC <sub>50</sub> =5.50±0.36μM dexamethasone control | CP                              | Hypericum wilsonii N. Robson, S, L, EtOH | [117] |
| Acylphloroglucinol | Hyperwilsonsone E | Cell viability                 | In vitro SUDHL-4 and HL60 cancer cell lines | Decreased tumour cells viability                                                                               |                                                                                       | AC                              | Hypericum wilsonii N. Robson, S, L, EtOH | [117] |
| Acylphloroglucinol | Hyperwilsonsone K | Cell viability                 | In vitro SUDHL-4 and HL60 cancer cell lines | Decreased tumour cells viability                                                                               |                                                                                       | AC                              | Hypericum wilsonii N. Robson, S, L, EtOH | [117] |
| Acylphloroglucinol | Hyphenrone V      | Cell viability                 | In vitro SUDHL-4 and HL60 cancer cell lines | Decreased tumour cells viability                                                                               |                                                                                       | AC                              | Hypericum wilsonii N. Robson, S, L, EtOH | [117] |

| Compound Class            | Compound        | Measurement                                | Method                                                                                                                                                              |                                                                                                   | Outcome                                                                                                                                                                                                                                                                                                                                        | Therapeutic Application | Species, Plant Part and Extract                         | Ref # |
|---------------------------|-----------------|--------------------------------------------|---------------------------------------------------------------------------------------------------------------------------------------------------------------------|---------------------------------------------------------------------------------------------------|------------------------------------------------------------------------------------------------------------------------------------------------------------------------------------------------------------------------------------------------------------------------------------------------------------------------------------------------|-------------------------|---------------------------------------------------------|-------|
| <b>Acylphloroglucinol</b> | Yezo'otogirin E | Bacterial susceptibility                   | <i>In vitro</i>                                                                                                                                                     | Active against <i>Escherichia coli</i> and <i>Staphylococcus aureus</i>                           | MIC=4.0 µg/mL ( <i>E.coli</i> )<br>MIC=8.0 µg/mL ( <i>S.aureus</i> )                                                                                                                                                                                                                                                                           | AM                      | <i>Hypericum yezoense</i> Maxim., AP, MeOH              | [118] |
| <b>Acylphloroglucinol</b> | Yojironin E     | Bacterial susceptibility<br>Cell viability | <i>In vitro</i><br><i>Aspergillus niger</i> , <i>Candida albicans</i> ,<br><i>Cryptococcus neoformans</i> ,<br><i>Trichophytum mentagrophytes</i><br>P388, KB cells | Active against all tested strains (selective activity)<br><b>Decreased</b> tumour cells viability | IC <sub>50</sub> =16 µg/mL ( <i>Aspergillus niger</i> )<br>IC <sub>50</sub> =4 µg/mL ( <i>Candida albicans</i> )<br>IC <sub>50</sub> =4 µg/mL ( <i>Cryptococcus neoformans</i> )<br>IC <sub>50</sub> =4 µg/mL ( <i>Trichophyton mentagrophytes</i> )<br>Cytotoxicity:<br>IC <sub>50</sub> =3.7µg/mL (P388).<br>IC <sub>50</sub> =5.0µg/mL (KB) | AM, AC                  | <i>Hypericum yojiroanum</i> Tatew. & Koji Ito, WP, MeOH | [119] |

| Compound Class            | Compound     | Measurement                                                     | Method                                                                                                                                                                                                                         |                                                                                         | Outcome                                                                                                                                                                                                                                                                                                                                                                                                                                              | Therapeutic Application | Species, Plant Part and Extract                               | Ref # |
|---------------------------|--------------|-----------------------------------------------------------------|--------------------------------------------------------------------------------------------------------------------------------------------------------------------------------------------------------------------------------|-----------------------------------------------------------------------------------------|------------------------------------------------------------------------------------------------------------------------------------------------------------------------------------------------------------------------------------------------------------------------------------------------------------------------------------------------------------------------------------------------------------------------------------------------------|-------------------------|---------------------------------------------------------------|-------|
| <b>Acylphloroglucinol</b> | Yojironin A  | Bacterial susceptibility<br>Cell viability                      | <i>In vitro</i><br><i>Aspergillus niger</i> , <i>Candida albicans</i> ,<br><i>Cryptococcus neoformans</i> ,<br><i>Trichophytum mentagrophytes</i> ,<br><i>S. aureus</i> , <i>B. subtilis</i><br>L1210, KB<br>tumour cell lines | Active against all tested strains<br><b>Decreased</b> tumour cells viability            | IC <sub>50</sub> =8 µg/mL ( <i>Aspergillus niger</i> )<br>IC <sub>50</sub> =2 µg/mL ( <i>Candida albicans</i> )<br>IC <sub>50</sub> =4 µg/mL ( <i>Cryptococcus neoformans</i> )<br>IC <sub>50</sub> =2 µg/mL ( <i>Trichophyton mentagrophytes</i> )<br>IC <sub>50</sub> =8 µg/mL ( <i>S. aureus</i> )<br>IC <sub>50</sub> =4 µg/mL ( <i>B. subtilis</i> )<br>Cytotoxicity:<br>IC <sub>50</sub> =4.1µg/mL (L1210),<br>IC <sub>50</sub> =6.8µg/mL (KB) | AM, AC                  | <i>Hypericum yojiroanum</i><br>Tatew. & Koji<br>Ito, WP, MeOH | [120] |
| <b>Acylphloroglucinol</b> | Hypatone A   | Action potential                                                | <i>In vitro</i><br>Cav3.1 low voltage-gated Ca <sup>2+</sup> channels                                                                                                                                                          | Hypatone A is a Cav3.1 agonist, while biosynthetic analogues acted as antagonists       | Activation of Ca v3.1                                                                                                                                                                                                                                                                                                                                                                                                                                | AEp, Sp.At              | <i>Hypericum patulum</i><br>Thunb, AP, MeOH                   | [121] |
| <b>Acylphloroglucinol</b> | Hyperinoid A | NF-κB pathway; LPS-induced inflammatory response in macrophages | <i>In vitro</i>                                                                                                                                                                                                                | Downregulation of mRNA levels of IL-1β, IL-6, iNOS;<br><b>Inhibition:</b> NF-κB pathway | IC <sub>50</sub> =0.75±0.17 µmol/L vs IC <sub>50</sub> =0.07±0.01 µmol/L Bortezomib control                                                                                                                                                                                                                                                                                                                                                          | AI                      | <i>Hypericum patulum</i><br>Thunb, AP, -                      | [122] |

| Compound Class            | Compound         | Measurement                                                     | Method                        | Outcome                                                                                 |                                                                                             | Therapeutic Application | Species, Plant Part and Extract               | Ref # |
|---------------------------|------------------|-----------------------------------------------------------------|-------------------------------|-----------------------------------------------------------------------------------------|---------------------------------------------------------------------------------------------|-------------------------|-----------------------------------------------|-------|
| <b>Acylphloroglucinol</b> | Hyperinoid B     | NF-κB pathway; LPS-induced inflammatory response in macrophages | <i>In vitro</i>               | Downregulation of mRNA levels of IL-1β, IL-6, iNOS;<br><b>Inhibition:</b> NF-κB pathway | IC <sub>50</sub> =1.19±0.48 μmol/L vs IC <sub>50</sub> =0.07±0.01 μmol/L Bortezomib control | AI                      | <i>Hypericum patulum</i> Thunb, AP, -         | [122] |
| <b>Acylphloroglucinol</b> | Wilsonxanthone A | Glucose transporter 4 activity                                  | <i>In vitro</i> L6 cell model | Increased GLUT4 translocation                                                           | vs insulin positive control                                                                 | ADb                     | <i>Hypericum wilsonii</i> N. Robson, AP, EtOH | [123] |
| <b>Acylphloroglucinol</b> | Furohyperforin   | Glucose transporter 4 activity                                  | <i>In vitro</i> L6 cell model | Increased GLUT4 translocation                                                           | vs insulin positive control                                                                 | ADb                     | <i>Hypericum wilsonii</i> N. Robson, AP, EtOH | [123] |
| <b>Acylphloroglucinol</b> | Hyperwilone A    | Glucose transporter 4 activity                                  | <i>In vitro</i> L6 cell model | Increased GLUT4 translocation                                                           | vs insulin positive control                                                                 | ADb                     | <i>Hypericum wilsonii</i> N. Robson, AP, EtOH | [123] |
| <b>Acylphloroglucinol</b> | Hyperwilone B    | Glucose transporter 4 activity                                  | <i>In vitro</i> L6 cell model | Increased GLUT4 translocation                                                           | vs insulin positive control                                                                 | ADb                     | <i>Hypericum wilsonii</i> N. Robson, AP, EtOH | [123] |



| Compound Class            | Compound         | Measurement                        | Method                                                                                           | Outcome                                                  |                             | Therapeutic Application | Species, Plant Part and Extract               | Ref # |
|---------------------------|------------------|------------------------------------|--------------------------------------------------------------------------------------------------|----------------------------------------------------------|-----------------------------|-------------------------|-----------------------------------------------|-------|
| <b>Acylphloroglucinol</b> | Hyperwilone C    | Glucose transporter 4 activity     | <i>In vitro</i> L6 cell model                                                                    | Increased GLUT4 translocation                            | vs insulin positive control | ADb                     | <i>Hypericum wilsonii</i> N. Robson, AP, EtOH | [123] |
| <b>Acylphloroglucinol</b> | Furoadhyperforin | Glucose transporter 4 activity     | <i>In vitro</i> L6 cell model                                                                    | Increased GLUT4 translocation                            | vs insulin positive control | ADb                     | <i>Hypericum wilsonii</i> N. Robson, AP, EtOH | [123] |
| <b>Acylphloroglucinol</b> | Pseudohenone     | Glucose transporter 4 activity     | <i>In vitro</i> L6 cell model                                                                    | Increased GLUT4 translocation                            | vs insulin positive control | ADb                     | <i>Hypericum wilsonii</i> N. Robson, AP, EtOH | [123] |
| <b>Acylphloroglucinol</b> | Hyperscabin A    | Cell viability, Serotonin reuptake | <i>In vitro</i> oxygen and glucose deprivation model<br><i>In vitro</i> serotonin reuptake model | Increased cell viability<br>Decreased serotonin reuptake |                             | CP, AD                  | <i>Hypericum scabrum</i> L., AP, EtOH         | [124] |
| <b>Acylphloroglucinol</b> | Hyperscabin B    | Serotonin reuptake                 | <i>In vitro</i> serotonin reuptake model                                                         | Decreased serotonin reuptake                             |                             | AD                      | <i>Hypericum scabrum</i> L., AP, EtOH         | [124] |

| Compound Class            | Compound       | Measurement           | Method                                                                                                              | Outcome                                                                                                                                                                                | Therapeutic Application | Species, Plant Part and Extract                | Ref # |
|---------------------------|----------------|-----------------------|---------------------------------------------------------------------------------------------------------------------|----------------------------------------------------------------------------------------------------------------------------------------------------------------------------------------|-------------------------|------------------------------------------------|-------|
| <b>Acylphloroglucinol</b> | Norwilsonnol A | Cell proliferation    | <i>Ex vivo</i> mice splenocytes                                                                                     | Decreased splenocyte proliferation, cytokine production                                                                                                                                | IM                      | <i>Hypericum wilsonii</i> N. Robson, S,L, EtOH | [125] |
| <b>Acylphloroglucinol</b> | Hypermonone E  | Multidrug resistance  | <i>In vitro</i> HepG2 and MCF-7 adriamycin resistant cell lines                                                     | Reversed drug resistance                                                                                                                                                               | AC                      | <i>Hypericum monogynum</i> L., Fl, MeOH        | [126] |
| <b>Acylphloroglucinol</b> | Hypermonone F  | Multidrug resistance  | <i>In vitro</i> HepG2 and MCF-7 adriamycin resistant cell lines                                                     | Reversed drug resistance                                                                                                                                                               | AC                      | <i>Hypericum monogynum</i> L., Fl, MeOH        | [126] |
| <b>Acylphloroglucinol</b> | Hypermonone I  | Multidrug resistance  | <i>In vitro</i> HepG2 and MCF-7 adriamycin resistant cell lines                                                     | Reversed drug resistance                                                                                                                                                               | AC                      | <i>Hypericum monogynum</i> L., Fl, MeOH        | [126] |
| <b>Acylphloroglucinol</b> | Hyperforin     | Expression modulation | <i>In vitro</i> murine splenic $\gamma\delta$ T cells, and HaCaT cells; <i>In vivo</i> imiquimod induced mice model | Reduced epidermal thickness and decreased IMQ-induced pathological scores of cutaneous skin lesions in mice; TNF $\alpha$ levels Downregulated expression of inflammatory interleukins | AI                      | <i>Hypericum</i> spp., -, -                    | [127] |

| Compound Class            | Compound         | Measurement                    | Method                                                                             | Outcome                                                                                                                               | Therapeutic Application | Species, Plant Part and Extract             | Ref # |
|---------------------------|------------------|--------------------------------|------------------------------------------------------------------------------------|---------------------------------------------------------------------------------------------------------------------------------------|-------------------------|---------------------------------------------|-------|
| <b>Acylphloroglucinol</b> | Hyperpatulones E | $\alpha$ -glycosidase activity | <i>In vitro</i> model                                                              | Decreased $\alpha$ -glucosidase activity<br>IC <sub>50</sub> = 37.69±2.05µM vs<br>IC <sub>50</sub> =156.18±6.12µM<br>acarbose control | ADb                     | <i>Hypericum patulum</i> Thunb., L, EtOH    | [128] |
| <b>Acylphloroglucinol</b> | Hyperpatulones F | $\alpha$ -glycosidase activity | <i>In vitro</i> model                                                              | Decreased $\alpha$ -glucosidase activity<br>IC <sub>50</sub> = 20.99±4.49µM vs<br>IC <sub>50</sub> =156.18±6.12µM<br>acarbose control | ADb                     | <i>Hypericum patulum</i> Thunb., L, EtOH    | [128] |
| <b>Acylphloroglucinol</b> | Hyperpatulones G | $\alpha$ -glycosidase activity | <i>In vitro</i> model                                                              | Decreased $\alpha$ -glucosidase activity<br>IC <sub>50</sub> = 14.06±4.44µM vs<br>IC <sub>50</sub> =156.18±6.12µM<br>acarbose control | ADb                     | <i>Hypericum patulum</i> Thunb., L, EtOH    | [128] |
| <b>Acylphloroglucinol</b> | Hypermonone A    | Cell viability                 | <i>In vitro</i> SK-N-SH cells                                                      | Increased cell viability<br>Decreased induced cell toxicity                                                                           | CP                      | <i>Hypericum beanii</i> N. Robson, AP, MeOH | [129] |
| <b>Acylphloroglucinol</b> | Uliginosin B     | Antimicrobial activity         | <i>In vitro</i> <i>Enterococcus faecalis</i> , <i>Staphylococcus aureus</i> , MRSA | Active against all tested strains (selective activity)                                                                                | AM                      | <i>Hypericum</i> spp., -, -                 | [130] |

| Compound Class     | Compound           | Measurement            | Method                                                                             | Outcome                                                          |                                                                                       | Therapeutic Application | Species, Plant Part and Extract                 | Ref # |
|--------------------|--------------------|------------------------|------------------------------------------------------------------------------------|------------------------------------------------------------------|---------------------------------------------------------------------------------------|-------------------------|-------------------------------------------------|-------|
| Acylphloroglucinol | Japonicin A        | Antimicrobial activity | <i>In vitro</i> <i>Enterococcus faecalis</i> , <i>Staphylococcus aureus</i> , MRSA | Active against all tested strains (selective activity)           |                                                                                       | AM                      | <i>Hypericum</i> spp., -, -                     | [130] |
| Acylphloroglucinol | Hyperbrasilol B    | Antimicrobial activity | <i>In vitro</i> <i>Enterococcus faecalis</i> , <i>Staphylococcus aureus</i> , MRSA | Active against all tested strains (selective activity)           |                                                                                       | AM                      | <i>Hypericum</i> spp., -, -                     | [130] |
| Acylphloroglucinol | Spihyperglucinol A | Cell viability         | <i>In vitro</i> LPS stimulated RAW 264.7 cells                                     | Decreased NO production, cell damage<br>Increased cell viability | IC <sub>50</sub> = 8.7±1.18µM vs IC <sub>50</sub> =9.76±1.13µM dexamethasone control  | CP                      | <i>Hypericum longistylum</i> Oliv., AP, S, EtOH | [131] |
| Acylphloroglucinol | Spihyperglucinol B | Cell viability         | <i>In vitro</i> LPS stimulated RAW 264.7 cells                                     | Decreased NO production, cell damage<br>Increased cell viability | IC <sub>50</sub> = 9.23±1.26µM vs IC <sub>50</sub> =9.76±1.13µM dexamethasone control | CP                      | <i>Hypericum longistylum</i> Oliv., AP, S, EtOH | [131] |
| Acylphloroglucinol | Hybeanone A        | AChE activity          | <i>In vitro</i> model                                                              | Decreased AChE activity                                          |                                                                                       | CP                      | <i>Hypericum beanii</i> N. Robson, AP, EtOH     | [132] |

| Compound Class                       | Compound                  | Measurement              | Method                                                                                                                                | Outcome                                                    | Therapeutic Application                                                                                                                                                                                                                                     | Species, Plant Part and Extract                   | Ref # |
|--------------------------------------|---------------------------|--------------------------|---------------------------------------------------------------------------------------------------------------------------------------|------------------------------------------------------------|-------------------------------------------------------------------------------------------------------------------------------------------------------------------------------------------------------------------------------------------------------------|---------------------------------------------------|-------|
| <b>Acylphloroglucinol</b>            | Hybeanone B               | AChE activity            | <i>In vitro</i> model                                                                                                                 | Decreased AChE activity                                    | CP                                                                                                                                                                                                                                                          | <i>Hypericum beanii</i> N. Robson, AP, EtOH       | [132] |
| <b>Acylphloroglucinol (analogue)</b> | Sarothralen C             | Bacterial susceptibility | <i>In vitro</i> <i>Escherichia coli</i> , <i>Staphylococcus aureus</i> , <i>Salmonella typhimurium</i> , <i>Enterococcus faecalis</i> | Selective antimicrobial activity against bacterial species | MICs= 21.4μM ( <i>E.coli</i> ), 85.6μM ( <i>S. aureus</i> ), 5.4μM ( <i>S. typhimurium</i> ), 10.7μM( <i>E. faecalis</i> ) vs Cefotaxime control<br>MICs= 0.4μM ( <i>E. coli</i> , <i>E. faecalis</i> ), 3.3μM ( <i>S. aureus</i> , <i>S. typhimurium</i> ) | AM<br><i>Hypericum japonicum</i> Thunb., WP, MeOH | [61]  |
| <b>Acylphloroglucinol (analogue)</b> | Sarothralin / Japonicin C | Bacterial susceptibility | <i>In vitro</i> <i>Escherichia coli</i> , <i>Staphylococcus aureus</i> , <i>Salmonella typhimurium</i> , <i>Enterococcus faecalis</i> | Selective antimicrobial activity against bacterial species | MICs= 1.9μM ( <i>E.coli</i> , <i>S. aureus</i> , <i>E. faecalis</i> ), 0.9μM ( <i>S. typhimurium</i> ) vs Cefotaxime control<br>MICs= 0.4μM ( <i>E. coli</i> , <i>E. faecalis</i> ). 3.3μM ( <i>S. aureus</i> , <i>S. typhimurium</i> )                     | AM<br><i>Hypericum japonicum</i> Thunb., WP, MeOH | [61]  |
| <b>Acylphloroglucinol (analogue)</b> | Sarothralen A             | Bacterial susceptibility | <i>In vitro</i> <i>Escherichia coli</i> , <i>Staphylococcus aureus</i> , <i>Salmonella typhimurium</i> , <i>Enterococcus faecalis</i> | Selective antimicrobial activity against bacterial species | MICs= 0.9μM ( <i>E.coli</i> ). 1.8μM ( <i>S. aureus</i> , <i>E. faecalis</i> , <i>S. typhimurium</i> ) vs Cefotaxime control<br>MICs= 0.4μM ( <i>E. coli</i> , <i>E. faecalis</i> ), 3.3μM ( <i>S. aureus</i> , <i>S. typhimurium</i> )                     | AM<br><i>Hypericum japonicum</i> Thunb., WP, MeOH | [61]  |

| Compound Class                | Compound         | Measurement                                | Method                                                                                                                                                | Outcome                                                                                            | Therapeutic Application                                                                                                                                                  | Species, Plant Part and Extract | Ref #                                        |       |
|-------------------------------|------------------|--------------------------------------------|-------------------------------------------------------------------------------------------------------------------------------------------------------|----------------------------------------------------------------------------------------------------|--------------------------------------------------------------------------------------------------------------------------------------------------------------------------|---------------------------------|----------------------------------------------|-------|
| Acylphloroglucinol derivative | (+) Elodeoidol C | Oxidative stress                           | <i>In vitro</i> RAW264.7 cells                                                                                                                        | <b>Decreased</b> oxidative stress induced inflammatory damage                                      | IC <sub>50</sub> = 10.39±0.49 μM vs IC <sub>50</sub> =2.90±0.98 N-monomethyl-L-arginine control                                                                          | CP<br>AI                        | <i>Hypericum elodeoides</i> Choisy, AP, EtOH | [133] |
| Acylphloroglucinol derivative | (-) Elodeoidol C | Oxidative stress                           | <i>In vitro</i> RAW264.7 cells                                                                                                                        | <b>Decreased</b> oxidative stress induced inflammatory damage                                      | IC <sub>50</sub> = 21.41±2.41 μM vs IC <sub>50</sub> =2.90±0.98 N-monomethyl-L-arginine control                                                                          | CP<br>AI                        | <i>Hypericum elodeoides</i> Choisy, AP, EtOH | [133] |
| Acylphloroglucinol derivative | (+) Elodeoidol G | Oxidative stress                           | <i>In vitro</i> RAW264.7 cells                                                                                                                        | <b>Decreased</b> oxidative stress induced inflammatory damage                                      | IC <sub>50</sub> = 20.56±1.91 μM vs IC <sub>50</sub> =2.90±0.98 N-monomethyl-L-arginine control                                                                          | CP<br>AI                        | <i>Hypericum elodeoides</i> Choisy, AP, EtOH | [133] |
| Acylphloroglucinol derivative | (-) Elodeoidol G | Oxidative stress                           | <i>In vitro</i> RAW264.7 cells                                                                                                                        | <b>Decreased</b> oxidative stress induced inflammatory damage                                      | IC <sub>50</sub> = 34.25±2.32 μM vs IC <sub>50</sub> =2.90±0.98 N-monomethyl-L-arginine control                                                                          | CP<br>AI                        | <i>Hypericum elodeoides</i> Choisy, AP, EtOH | [133] |
| Acylphloroglucinol derivative | (+) Elodeoidol H | Oxidative stress, Bacterial susceptibility | <i>In vitro</i> RAW264.7 cells, <i>Fusobacterium nucleatum</i> subsp. <i>Polymorphun</i> , <i>Streptococcus mutans</i> , <i>Streptococcus sanguis</i> | <b>Decreased</b> oxidative stress induced inflammatory damage<br><b>Decreased</b> bacterial growth | IC <sub>50</sub> = 21.33±1.73 μM vs IC <sub>50</sub> =2.90±0.98 N-monomethyl-L-arginine control<br>MIC= 25μg/mL vs MIC=3.91 - 0.98μg/mL cetylpyridinium chloride control | CP<br>AI<br>AM                  | <i>Hypericum elodeoides</i> Choisy, AP, EtOH | [133] |

| Compound Class                       | Compound         | Measurement                                | Method                                                                                                                                                | Outcome                                                                                            | Therapeutic Application                                                                                                                                                  | Species, Plant Part and Extract | Ref #                                        |       |
|--------------------------------------|------------------|--------------------------------------------|-------------------------------------------------------------------------------------------------------------------------------------------------------|----------------------------------------------------------------------------------------------------|--------------------------------------------------------------------------------------------------------------------------------------------------------------------------|---------------------------------|----------------------------------------------|-------|
| <b>Acylphloroglucinol derivative</b> | (-) Elodeoidol H | Oxidative stress, Bacterial susceptibility | <i>In vitro</i> RAW264.7 cells, <i>Fusobacterium nucleatum</i> subsp. <i>Polymorphun</i> , <i>Streptococcus mutans</i> , <i>Streptococcus sanguis</i> | <b>Decreased</b> oxidative stress induced inflammatory damage<br><b>Decreased</b> bacterial growth | IC <sub>50</sub> = 28.96±1.19 μM vs IC <sub>50</sub> =2.90±0.98 N-monomethyl-L-arginine control<br>MIC= 25μg/mL vs MIC=3.91 - 0.98μg/mL cetylpyridinium chloride control | CP<br>AI<br>AM                  | <i>Hypericum elodeoides</i> Choisy, AP, EtOH | [133] |
| <b>Acylphloroglucinol derivative</b> | (+) Elodeoidol E | Bacterial susceptibility                   | <i>In vitro</i> <i>Fusobacterium nucleatum</i> subsp. <i>Polymorphun</i> , <i>Streptococcus mutans</i> , <i>Streptococcus sanguis</i>                 | <b>Decreased</b> bacterial growth                                                                  | MIC= 25 - 6.25μg/mL vs MIC=3.91 - 0.98μg/mL cetylpyridinium chloride control                                                                                             | AM                              | <i>Hypericum elodeoides</i> Choisy, AP, EtOH | [133] |
| <b>Acylphloroglucinol derivative</b> | (-) Elodeoidol E | Bacterial susceptibility                   | <i>In vitro</i> <i>Fusobacterium nucleatum</i> subsp. <i>Polymorphun</i> , <i>Streptococcus mutans</i> , <i>Streptococcus sanguis</i>                 | <b>Decreased</b> bacterial growth                                                                  | MIC= >25μg/mL vs MIC=3.91 - 0.98μg/mL cetylpyridinium chloride control                                                                                                   | AM                              | <i>Hypericum elodeoides</i> Choisy, AP, EtOH | [133] |

| Compound Class                | Compound         | Measurement                      | Method                                                                                                                                   | Outcome                                                                                |                                                                                                                                | Therapeutic Application | Species, Plant Part and Extract                 | Ref # |
|-------------------------------|------------------|----------------------------------|------------------------------------------------------------------------------------------------------------------------------------------|----------------------------------------------------------------------------------------|--------------------------------------------------------------------------------------------------------------------------------|-------------------------|-------------------------------------------------|-------|
| Acylphloroglucinol derivative | (+) Elodeoidol I | Bacterial susceptibility         | <i>In vitro</i><br><i>Fusobacterium nucleatum</i> subsp. <i>Polymorphun</i> , <i>Streptococcus mutans</i> , <i>Streptococcus sanguis</i> | Decreased bacterial growth                                                             | MIC= >25µg/mL vs MIC=3.91 - 0.98µg/mL cetylpyridinium chloride control                                                         | AM                      | <i>Hypericum elodeoides</i> Choisy, AP, EtOH    | [133] |
| Acylphloroglucinol derivative | (-) Elodeoidol I | Bacterial susceptibility         | <i>In vitro</i><br><i>Fusobacterium nucleatum</i> subsp. <i>Polymorphun</i> , <i>Streptococcus mutans</i> , <i>Streptococcus sanguis</i> | Decreased bacterial growth                                                             | MIC= >25µg/mL vs MIC=3.91 - 0.98µg/mL cetylpyridinium chloride control                                                         | AM                      | <i>Hypericum elodeoides</i> Choisy, AP, EtOH    | [133] |
| Anthraquinone                 | Hypericin        | Cell viability, Oxidative stress | <i>In vitro</i>                                                                                                                          | Increased cell viability<br>Decreased NO LPS induced production                        | Decreased COX2, iNOS, TNFα, IL-1 β, IL-6 gene expression level                                                                 | CP                      | <i>Hypericum hookerianum</i> Wight & Arn., -, - | [134] |
| Anthraquinone                 | Hypericin        | Bacterial susceptibility         | <i>In vitro</i><br><i>S. aureus</i>                                                                                                      | Increased antimicrobial activity against <i>S. aureus</i> when combined with carvacrol | Hypericin MIC decreased when combined with carvacrol<br>Hypericin disk diffusion radius increased when combined with carvacrol | AM                      | <i>Hypericum perforatum</i> L., WP, EtOH        | [135] |



| Compound Class       | Compound                                             | Measurement                      | Method                                                                                                                        | Outcome                                                                                                                | Therapeutic Application                                                                                                                                                                                                              | Species, Plant Part and Extract                        | Ref # |
|----------------------|------------------------------------------------------|----------------------------------|-------------------------------------------------------------------------------------------------------------------------------|------------------------------------------------------------------------------------------------------------------------|--------------------------------------------------------------------------------------------------------------------------------------------------------------------------------------------------------------------------------------|--------------------------------------------------------|-------|
| <b>Anthraquinone</b> | Emodin                                               | Cell viability, Oxidative stress | <i>In vitro</i> A375, MDA-MB-231, SiHa, SHSY-5Y cancer cell lines; LPS stimulated RAW264,7, THP-1 and BV-2 inflammatory model | <b>Decreased</b> cell viability (selective cytotoxicity) <b>Decreased</b> oxidative stress induced inflammatory damage | IC <sub>50</sub> = 84.41±0.03 - 8.56±0.32 µM vs IC <sub>50</sub> =15.74±0.13 - 5.14±0.16 µM Cisplatin control<br>IC <sub>50</sub> = 17.06±0.80 - 12.39±1.0 µM vs IC <sub>50</sub> =19.37±0.72 - 15.20±1.10 µM Indomethacin control   | AC<br>AI<br><i>Hypericum sampsonii</i> Hance, WP, EtOH | [136] |
| <b>Anthraquinone</b> | 3-ethyl-1,8-dihydroxy-6-methoxyanthracene-9,10-dione | Cell viability, Oxidative stress | <i>In vitro</i> A375, MDA-MB-231, SiHa, SHSY-5Y cancer cell lines; LPS stimulated RAW264,7, THP-1 and BV-2 inflammatory model | <b>Decreased</b> cell viability (selective cytotoxicity) <b>Decreased</b> oxidative stress induced inflammatory damage | IC <sub>50</sub> = 106.30±0.27 - 32.21±1.77 µM vs IC <sub>50</sub> =15.74±0.13 - 5.14±0.16 µM Cisplatin control<br>IC <sub>50</sub> = 17.9±0.51 - 14.11±0.53 µM vs IC <sub>50</sub> =19.37±0.72 - 15.20±1.10 µM Indomethacin control | AC<br>AI<br><i>Hypericum sampsonii</i> Hance, WP, EtOH | [136] |
| <b>Anthraquinone</b> | Hypericin                                            | Cell viability                   | <i>In vivo</i> Thyroid cancer mouse model FRO cells                                                                           | <b>Decreased</b> tumour growth                                                                                         | <b>Increased</b> intracellular ROS<br><b>Increased</b> cell death in combination with power dependent laser application                                                                                                              | PDT<br><i>Hypericum</i> spp., -, -                     | [137] |

| Compound Class       | Compound  | Measurement                                    | Method                           | Outcome                                                                                                                    | Therapeutic Application                                                                                                                                                                                                                  | Species, Plant Part and Extract   | Ref # |
|----------------------|-----------|------------------------------------------------|----------------------------------|----------------------------------------------------------------------------------------------------------------------------|------------------------------------------------------------------------------------------------------------------------------------------------------------------------------------------------------------------------------------------|-----------------------------------|-------|
| <b>Anthraquinone</b> | Hypericin | Cell viability                                 | <i>In vitro</i><br>HT-29 cells   | Increased intracellular hypericin concentration might be correlated with anti-carcinogenic effect of HYP-mediated PDT      | PDT                                                                                                                                                                                                                                      | <i>Hypericum</i> spp., -          | [138] |
| <b>Anthraquinone</b> | Hypericin | Cell Viability                                 | <i>In vitro</i><br>HUVEC cells   | <b>Decreased</b> apoptosis                                                                                                 | <b>Increased</b> Bcl-2 expression, cell viability<br><b>Decreased</b> Bax, p53 expression, MAPKs activation, AGEs formation, ROS generation                                                                                              | CP<br><i>Hypericum</i> spp., -, - | [139] |
| <b>Anthraquinone</b> | Hypericin | Cell viability<br>CYP1A2 and CYP2D6 expression | <i>In vitro</i><br>WRL-68, HepG2 | <b>Increased</b> CYP1A2, CYP2D6 (HepG2) expression<br><b>Decreased</b> CYP1A2 (HepaRG), CYP2D6 (HepaRG, WRL-68) expression | Int                                                                                                                                                                                                                                      | <i>Hypericum</i> spp., -, -       | [102] |
| <b>Anthraquinone</b> | Hypericin | Cell viability                                 | <i>In vitro</i><br>MCF-7 cells   | <b>Decreased</b> cell viability                                                                                            | LD <sub>50</sub> = 5 µg/mL vs 20 µg/mL Cysplatin control 24h<br>LD <sub>50</sub> = 0.5 µg/mL vs 7.5 µg/mL Cysplatin control 48h<br><b>Decreased</b> MDF-7 cell growth rate, Bcl2 expression<br><b>Increased</b> p3 expression, apoptosis | AC<br><i>Hypericum</i> spp., -, - | [20]  |

| Compound Class       | Compound  | Measurement                                                                  | Method                                                                                         | Outcome                                                                                                                                           | Therapeutic Application                                                                                                                                                                                                                                       | Species, Plant Part and Extract      | Ref # |
|----------------------|-----------|------------------------------------------------------------------------------|------------------------------------------------------------------------------------------------|---------------------------------------------------------------------------------------------------------------------------------------------------|---------------------------------------------------------------------------------------------------------------------------------------------------------------------------------------------------------------------------------------------------------------|--------------------------------------|-------|
| <b>Anthraquinone</b> | Hypericin | Stress-induced depressive behaviours                                         | <i>In vivo</i> mouse model                                                                     | <b>Increased</b> body weight, independent behavior, pleasant stimulus response, <b>Decreased</b> stress hormone levels                            | AD                                                                                                                                                                                                                                                            | <i>Hypericum</i> spp., -, -          | [16]  |
| <b>Anthraquinone</b> | Hypericin | Cell viability, apoptosis                                                    | <i>In vitro</i> RINm5F cells                                                                   | <b>Increased</b> apoptosis<br><b>Decreased</b> cell viability (photoactivated); cell proliferation (photoactivated)                               | AC                                                                                                                                                                                                                                                            | <i>Hypericum</i> spp., -, -          | [21]  |
| <b>Anthraquinone</b> | Hypericin | <i>Leishmania (Viannia) panamensis</i> infected macrophages<br>Wound healing | <i>In vitro</i> U-937 promonocytes, Detroit 551 fibroblast cells<br><i>In vivo</i> mouse model | <b>Increased</b> wound healing ( <i>in vitro</i> and <i>in vivo</i> )<br><b>Decreased</b> (Photoactivation dependent) intracellular parasite load | Antileishmanial activity: IC <sub>50</sub> =2.5 ± 0.14 µM (no photoactivation). IC <sub>50</sub> =1.2 ± 0.007 µM (photoactivated) vs IC <sub>50</sub> =0.61±0.005 µM AmB control<br><b>Increased</b> wound healing growth factors production (EGF, PDGF, FGF) | S, AP<br><i>Hypericum</i> spp., -, - | [140] |

| Compound Class       | Compound  | Measurement                   | Method                                              | Outcome                                                                                                                                                                                                                                       |                                                                                                       | Therapeutic Application | Species, Plant Part and Extract | Ref # |
|----------------------|-----------|-------------------------------|-----------------------------------------------------|-----------------------------------------------------------------------------------------------------------------------------------------------------------------------------------------------------------------------------------------------|-------------------------------------------------------------------------------------------------------|-------------------------|---------------------------------|-------|
| <b>Anthraquinone</b> | Hypericin | Cell viability                | <i>In vitro</i> A2780, A2780cis, HL-60, cBCRP cells | <b>Decreased</b> cisplatin and mitoxantrone induced metabolic inhibition (A2780, A2780cis, HL-60); cisplatin induced A2780/A2780cis cell death; mitoxantrone induced HL-60 cell death; <b>Increased</b> mitoxantrone induced cBCRP cell death | <b>Increased</b> MRP1 expression (A2780/A2780cis)                                                     | CP                      | <i>Hypericum</i> spp., -, -     | [141] |
| <b>Anthraquinone</b> | Hypericin | Photodynamic therapy          | <i>In vitro</i>                                     | Potent photosensitizer after topical application and excitation by laser light of wavelength 405 nm                                                                                                                                           |                                                                                                       | PDT                     | <i>Hypericum</i> spp., -, -     | [142] |
| <b>Anthraquinone</b> | Hypericin | Induced nociceptive behaviour | <i>In vivo</i> mouse model                          | <b>Decreased</b> NO induced painful behaviour                                                                                                                                                                                                 | <b>Decreased</b> NO induced p-CREB expression, p-STAT1 upregulation, NF-κB activation, PKC expression | AD, AN                  | <i>Hypericum</i> spp., -, -     | [143] |
| <b>Anthraquinone</b> | Hypericin | Cell viability                | <i>In vitro</i> SCC cells                           | <b>Decreased</b> cell viability                                                                                                                                                                                                               | <b>Increased</b> ROS formation                                                                        | AC                      | <i>Hypericum</i> spp., -, -     | [23]  |

| Compound Class       | Compound  | Measurement                                                                                     | Method                        | Outcome          |                                                                                                              | Therapeutic Application | Species, Plant Part and Extract | Ref # |
|----------------------|-----------|-------------------------------------------------------------------------------------------------|-------------------------------|------------------|--------------------------------------------------------------------------------------------------------------|-------------------------|---------------------------------|-------|
| <b>Anthraquinone</b> | Hypericin | GST-pi activity                                                                                 | <i>In vitro</i>               | <b>Decreased</b> | GST-pi activity                                                                                              | CP                      | <i>Hypericum</i> spp., -, -     | [144] |
| <b>Anthraquinone</b> | Hypericin | Action potential and voltage-gated Na <sup>+</sup> , I <sub>A</sub> and I <sub>K</sub> currents | <i>In vitro</i>               | <b>Increased</b> | Action potential duration<br><b>Inhibited</b> transient I <sub>A</sub> and delayed I <sub>K</sub> K currents | AD                      | <i>Hypericum</i> spp., -, -     | [145] |
| <b>Anthraquinone</b> | Hypericin | Glutamate release                                                                               | <i>In vitro</i>               | <b>Decreased</b> | glutamate release                                                                                            | AD                      | <i>Hypericum</i> spp., -, -     | [146] |
| <b>Anthraquinone</b> | Hypericin | Cell viability                                                                                  | <i>In vitro</i><br>A431 cells | <b>Decreased</b> | cell viability (light dependent)<br><b>Increased</b> apoptosis                                               | AC                      | <i>Hypericum</i> spp., -, -     | [25]  |

| Compound Class       | Compound  | Measurement                           | Method                                                               | Outcome                                                                                | Therapeutic Application                                                                                                                                                                                   | Species, Plant Part and Extract         | Ref # |
|----------------------|-----------|---------------------------------------|----------------------------------------------------------------------|----------------------------------------------------------------------------------------|-----------------------------------------------------------------------------------------------------------------------------------------------------------------------------------------------------------|-----------------------------------------|-------|
| <b>Anthraquinone</b> | Hypericin | Cell division, DNA damage             | <i>In vitro</i> hamster lung fibroblast model (V79 cells)            | <b>Decreased</b> doxorubicin and methanesulfonate induced DNA damage                   | Combination of hypericin+methanesulfonate decreased DNA damage up to 59.99% (concentration dependent)<br>Combination of hypericin+doxorubicin decreased DNA damage up to 60.38% (concentration dependent) | CP<br>AC<br><i>Hypericum</i> spp., -, - | [147] |
| <b>Anthraquinone</b> | Hypericin | Pancreatic lipase activity            | <i>In vitro</i> pancreatic lipase model                              | <b>Decreased</b> pancreatic lipase activity                                            | IC <sub>50</sub> = 0.97±0.09 µM vs IC <sub>50</sub> =2.90±0.98 Isoginkgetin control vs IC <sub>50</sub> =0.75 nM Orlistat control                                                                         | Ad.In<br><i>Hypericum</i> spp., -, -    | [148] |
| <b>Anthraquinone</b> | Hypericin | SARS-CoV-2 activity                   | <i>In vitro</i> Vero-E6 infected cells                               | <b>Decreased</b> SARS-CoV-2 replication                                                |                                                                                                                                                                                                           | AV<br><i>Hypericum</i> spp., -, -       | [149] |
| <b>Anthraquinone</b> | Hypericin | Depressive behaviours                 | <i>In vivo</i> mouse depression model<br><i>In vitro</i> C2C12 cells | Decreased fatigue, oxidative stress<br>Increased swimming time in forced swimming test | Decreased expression of TNF-α, IL-1β, IL-6 and INF-γ                                                                                                                                                      | AD<br><i>Hypericum</i> spp., -, -       | [150] |
| <b>Anthraquinone</b> | Hypericin | <i>In vivo</i> mouse depression model |                                                                      |                                                                                        | Decreased IL-6, IL-1β, TNF-α expression                                                                                                                                                                   | AD<br><i>Hypericum</i> spp., -, -       | [151] |

| Compound Class       | Compound        | Measurement                | Method                                      |                                                      | Outcome                                                                                                                                                                                                             | Therapeutic Application | Species, Plant Part and Extract                  | Ref # |
|----------------------|-----------------|----------------------------|---------------------------------------------|------------------------------------------------------|---------------------------------------------------------------------------------------------------------------------------------------------------------------------------------------------------------------------|-------------------------|--------------------------------------------------|-------|
| <b>Anthraquinone</b> | Pseudohypericin | Pancreatic lipase activity | <i>In vitro</i> pancreatic lipase model     | <b>Decreased</b> pancreatic lipase activity          | IC <sub>50</sub> = 0.94±0.11 µM vs IC <sub>50</sub> =2.90±0.98 Isoginkgetin control vs IC <sub>50</sub> =0.75 nM Orlistat control                                                                                   | Ad.In                   | <i>Hypericum</i> spp., -, -                      | [148] |
| <b>Anthraquinone</b> | Protohypericin  | Pancreatic lipase activity | <i>In vitro</i> pancreatic lipase model     | <b>Decreased</b> pancreatic lipase activity          | IC <sub>50</sub> = 2.80±0.31 µM vs IC <sub>50</sub> =2.90±0.98 Isoginkgetin control vs IC <sub>50</sub> =0.75 nM Orlistat control                                                                                   | Ad.In                   | <i>Hypericum</i> spp., -, -                      | [148] |
| <b>Anthraquinone</b> | Emodin          | Pancreatic lipase activity | <i>In vitro</i> pancreatic lipase model     | <b>Decreased</b> pancreatic lipase activity          | IC <sub>50</sub> = 2.18±0.09 µM vs IC <sub>50</sub> =2.90±0.98 Isoginkgetin control vs IC <sub>50</sub> =0.75 nM Orlistat control                                                                                   | Ad.In                   | <i>Hypericum</i> spp., -, -                      | [148] |
| <b>Benzophenone</b>  | Sampsonione O   | Cell viability             | <i>In vitro</i> SK-N-SH cells               | <b>Increased</b> cell viability                      | Survival rate: 80.90% vs 62.10 donepezil control vs 63.20 % PHPB control                                                                                                                                            | CP                      | <i>Hypericum acmosepalum</i> N.Robson, AP, EtOH  | [33]  |
| <b>Benzophenone</b>  | Cariphenone A   | Cell viability             | <i>In vitro</i> U-251, HT-29, OVCAR-3 cells | <b>Decreased</b> cell viability (selective toxicity) | Cell viability% (HT-29): 47.0±1.8% vs 30.0±4.3% Irinotecan control<br>Cell viability% (OVCAR-3): 68.0±1.4% vs 58.0±7.9% Paclitaxel control<br>Cell viability% (U-251): 46.0±2.0% vs 40.0±8.0% Termozolomide control | AC                      | <i>Hypericum carinatum</i> Griseb., AP, n-Hexane | [70]  |

| Compound Class      | Compound                           | Measurement                      | Method                                            |                                                                                    | Outcome                                                                                                                                                                                                                      | Therapeutic Application | Species, Plant Part and Extract                     | Ref # |
|---------------------|------------------------------------|----------------------------------|---------------------------------------------------|------------------------------------------------------------------------------------|------------------------------------------------------------------------------------------------------------------------------------------------------------------------------------------------------------------------------|-------------------------|-----------------------------------------------------|-------|
| <b>Benzophenone</b> | Cariphenone B                      | Cell viability                   | <i>In vitro</i><br>U-251, HT-29,<br>OVCAR-3 cells | <b>Decreased</b> cell viability (selective toxicity)                               | Cell viability% (HT-29): 63.0±3.1% vs 30.0±4.3%<br>Irinotecan control<br>Cell viability% (OVCAR-3): 73.0±3.1% vs 58.0±7.9%<br>Paclitaxel control<br>Cell viability% (U-251): 47.0±1.8% vs 40.0±8.0%<br>Termozolomide control | AC                      | <i>Hypericum carinatum</i> Griseb., AP, n-Hexane    | [70]  |
| <b>Benzophenone</b> | Elegaphenone                       | Cell viability                   | <i>In vitro</i><br>HD-MY-Z, K-562, KE-37 cells    | <b>Decreased</b> cell viability (selective activity)<br><b>Increased</b> apoptosis | IC <sub>50</sub> = 16.9±1.6µM - 13.9±1.2µM vs IC <sub>50</sub> = 2.1±0.11µM - 0.6±0.01µM<br>Daunorubicine control                                                                                                            | AC                      | <i>Hypericum elegans</i> Stephan ex Willd., AP, DCM | [152] |
| <b>Benzophenone</b> | 7-epiclusianone                    | Cell viability                   | <i>In vitro</i><br>HD-MY-Z, K-562, KE-37 cells    | <b>Decreased</b> cell viability (selective activity)<br><b>Increased</b> apoptosis | IC <sub>50</sub> = 13.6±1.5µM - 9.8±1.4µM vs IC <sub>50</sub> = 2.1±0.11µM - 0.6±0.01µM<br>Daunorubicine control                                                                                                             | AC                      | <i>Hypericum elegans</i> Stephan ex Willd., AP, DCM | [152] |
| <b>Benzophenone</b> | 2,2',5,6'-Tetrahydroxybenzophenone | Protozoal susceptibility         | <i>In vitro</i><br><i>Plasmodium falciparum</i>   | Active against all tested strains                                                  | IC <sub>50</sub> =55.12±0.93µg/mL - 13.41±0.16µg/mL vs IC <sub>50</sub> =0.27±0.04µg/mL - 0.14±0.05µg/mL<br>quinine control                                                                                                  | Mal                     | <i>Hypericum lanceolatum</i> Lam., Sb, MeOH         | [153] |
| <b>Benzophenone</b> | Hyperewalone B                     | Cell viability, oxidative stress | <i>In vitro</i> BV-2 cell lines                   | <b>Decreased</b> LPS induced NO production                                         | IC <sub>50</sub> = 0.61±0.12 µM vs IC <sub>50</sub> =4.00±0.23µM<br>Quercetin control                                                                                                                                        | CP                      | <i>Hypericum przewalskii</i> Maxim., AP, MeOH       | [154] |



| Compound Class | Compound              | Measurement                          | Method                                                                                                                        | Outcome                                                                                                                | Therapeutic Application                                                                                                                                                                                                               | Species, Plant Part and Extract | Ref #                                         |       |
|----------------|-----------------------|--------------------------------------|-------------------------------------------------------------------------------------------------------------------------------|------------------------------------------------------------------------------------------------------------------------|---------------------------------------------------------------------------------------------------------------------------------------------------------------------------------------------------------------------------------------|---------------------------------|-----------------------------------------------|-------|
| Benzophenone   | Hyperprzeone A        | Cell viability                       | <i>In vitro</i> SH-SY5Y, MDA-MB-231, SiHa, SMMC-7721, NCI-H460 and A375 cell lines                                            | <b>Decreased</b> cell viability (selective cytotoxicity)                                                               | IC <sub>50</sub> = 124.41±4.16 - 25.54±0.63µM vs IC <sub>50</sub> =12.49±1.12 - 0.34±0.02µM Dexamethasone control                                                                                                                     | AC                              | <i>Hypericum przewalskii</i> Maxim., WP, EtOH | [155] |
| Benzophenone   | Sampsonin A           | RXRα transcription<br>Cell viability | <i>In vitro</i> HeLa, 293T cells                                                                                              | <b>Decreased</b> cell viability, RXRα transcription                                                                    |                                                                                                                                                                                                                                       | AC                              | <i>Hypericum sampsonii</i> Hance, AP, EtOH    | [156] |
| Benzophenone   | Sampsonin B           | RXRα transcription<br>Cell viability | <i>In vitro</i> HeLa, 293T cells                                                                                              | <b>Decreased</b> cell viability, RXRα transcription                                                                    |                                                                                                                                                                                                                                       | AC                              | <i>Hypericum sampsonii</i> Hance, AP, EtOH    | [156] |
| Benzophenone   | Garcimangosone D      | Cell viability, Oxidative stress     | <i>In vitro</i> A375, MDA-MB-231, SiHa, SHSY-5Y cancer cell lines; LPS stimulated RAW264,7, THP-1 and BV-2 inflammatory model | <b>Decreased</b> cell viability (selective cytotoxicity) <b>Decreased</b> oxidative stress induced inflammatory damage | IC <sub>50</sub> = 107.73±0.25 - 24.67±0.11 µM vs IC <sub>50</sub> =15.74±0.13 - 5.14±0.16 µM Cisplatin control<br>IC <sub>50</sub> = 19.14±0.37 - 14.52±0.64 µM vs IC <sub>50</sub> =19.37±0.72 - 15.20±1.10 µM Indomethacin control | AC<br>AI                        | <i>Hypericum sampsonii</i> Hance, WP, EtOH    | [136] |
| Benzophenone   | <i>Hypericumone</i> A | Cell viability, Oxidative stress     | <i>In vitro</i> RAW264.7 cells                                                                                                | <b>Decreased</b> oxidative stress induced inflammatory damage                                                          | <b>Decreased</b> NO production<br>IC <sub>50</sub> ≤ 40.32 µM                                                                                                                                                                         | CP<br>AI                        | <i>Hypericum sampsonii</i> Hance, AP, MeOH    | [157] |

| Compound Class | Compound                                                | Measurement              | Method                                       | Outcome                                                                                 | Therapeutic Application                                                           | Species, Plant Part and Extract | Ref #                                                                                  |       |
|----------------|---------------------------------------------------------|--------------------------|----------------------------------------------|-----------------------------------------------------------------------------------------|-----------------------------------------------------------------------------------|---------------------------------|----------------------------------------------------------------------------------------|-------|
| Benzophenone   | Sampsine A                                              | Oxidative stress         | <i>In vitro</i> RAW264.7 cell lines          | Decreased LPS-induced NO production                                                     | IC <sub>50</sub> = 2.4±0.69µM vs IC <sub>50</sub> =1.41±0.03µM cadamonin control  | CP                              | <i>Hypericum sampsonii</i> Hance, AP, MeOH                                             | [158] |
| Benzophenone   | Sampsine B                                              | Oxidative stress         | <i>In vitro</i> RAW264.7 cell lines          | Decreased LPS-induced NO production                                                     | IC <sub>50</sub> = 2.29±0.12µM vs IC <sub>50</sub> =1.41±0.03µM cadamonin control | CP                              | <i>Hypericum sampsonii</i> Hance, AP, MeOH                                             | [158] |
| Benzophenone   | Petiolin F                                              | Oxidative stress         | <i>In vitro</i> RAW264.7 cell lines          | Decreased LPS-induced NO production                                                     | IC <sub>50</sub> = 2.0±0.34µM vs IC <sub>50</sub> =1.41±0.03µM cadamonin control  | CP                              | <i>Hypericum sampsonii</i> Hance, AP, MeOH                                             | [158] |
| Benzophenone   | Cariphenone B                                           | Cell proliferation       | <i>In vitro</i> HaCaT, MRC5 and MSC          | Increased HaCaT proliferation                                                           | 0.1 µM (114% vs blank control)<br>0.01 µM (122.3% vs blank control)               | S                               | <i>Hypericum</i> spp., AP, n-Hexane                                                    | [97]  |
| Benzopyrane    | 6-isobutyryl-5,7-dimethoxy-2,2-dimethylbenzopyran       | Protozoal susceptibility | <i>In vitro</i> <i>Trichomonas vaginalis</i> | Decreased <i>T. vaginalis</i> cell viability (including metronidazole resistant strain) | IC <sub>50</sub> =226.50µM                                                        | AP                              | <i>Hypericum polyanthemum</i> Klotzsch ex Reichardt, AP, Supercritical CO <sub>2</sub> | [85]  |
| Benzopyrane    | 7-hydroxy-6-isobutyryl-5-methoxy-2,2-dimethylbenzopyran | Protozoal susceptibility | <i>In vitro</i> <i>Trichomonas vaginalis</i> | Decreased <i>T. vaginalis</i> cell viability                                            | IC <sub>50</sub> =833.65µM                                                        | AP                              | <i>Hypericum polyanthemum</i> Klotzsch ex Reichardt, AP, Supercritical CO <sub>2</sub> | [85]  |

| Compound Class        | Compound                                                | Measurement                          | Method                           | Outcome                                                                                                     |                                                                                                                                   | Therapeutic Application | Species, Plant Part and Extract                            | Ref # |
|-----------------------|---------------------------------------------------------|--------------------------------------|----------------------------------|-------------------------------------------------------------------------------------------------------------|-----------------------------------------------------------------------------------------------------------------------------------|-------------------------|------------------------------------------------------------|-------|
| Benzopyrane           | 6-isobutyryl-5,7-dimethoxy-2,2-dimethylbenzopyran       | Stress-induced depressive behaviours | In vivo mouse model              | Decreased painful behaviours                                                                                |                                                                                                                                   | AD                      | Hypericum polyanthemum Klotzsch ex Reichardt, AP, n-Hexane | [159] |
| Benzopyrane           | 7-hydroxy-6-isobutyryl-5-methoxy-2,2-dimethylbenzopyran | Cell proliferation                   | In vitro HaCaT, MRC5 and MSC     | Increased HaCaT proliferation                                                                               | 5 μM (114.3% vs blank control)                                                                                                    | S                       | Hypericum spp., AP, n-Hexane                               | [97]  |
| Benzoylphloroglucinol | Hyperscabrone K                                         | Cell viability                       | In vitro HepG2 cells             | Increased cell viability                                                                                    | Cell viability 54.5±1.4 % vs 54.8±2.0% Bicyclol control                                                                           | CP                      | Hypericum scabrum L., AP, EtOH                             | [160] |
| Benzoylphloroglucinol | Hyperscabrone M                                         | Cell viability                       | In vitro HepG2 cells             | Increased cell viability                                                                                    | Cell viability 60.2±3.0 % vs 54.8±2.0% Bicyclol control                                                                           | CP                      | Hypericum scabrum L., AP, EtOH                             | [160] |
| BiFlavone             | Biapigenin                                              | Radical scavenging                   | In vitro HepG <sub>2</sub> cells | Coadministration of compounds included in formulated nanoparticles showed free radicals scavenging activity |                                                                                                                                   | CP                      | Hypericum perforatum L., AP, MeOH                          | [161] |
| BiFlavone             | Amentoflavone                                           | Pancreatic lipase activity           | In vitro pancreatic lipase model | Decreased pancreatic lipase activity                                                                        | IC <sub>50</sub> = 9.94±0.41 μM vs IC <sub>50</sub> =2.90±0.98 Isoginkgetin control vs IC <sub>50</sub> =0.75 nM Orlistat control | Ad.In                   | Hypericum spp., -, -                                       | [148] |

| Compound Class    | Compound                                          | Measurement                          | Method                                                   |                                                                                                         | Outcome                                                                                                                                                                                                                | Therapeutic Application | Species, Plant Part and Extract                          | Ref # |
|-------------------|---------------------------------------------------|--------------------------------------|----------------------------------------------------------|---------------------------------------------------------------------------------------------------------|------------------------------------------------------------------------------------------------------------------------------------------------------------------------------------------------------------------------|-------------------------|----------------------------------------------------------|-------|
| <b>BiFlavone</b>  | I3,I18-Biapigenin                                 | Pancreatic lipase activity           | <i>In vitro</i> pancreatic lipase model                  | <b>Decreased</b> pancreatic lipase activity                                                             | IC <sub>50</sub> = 0.78±0.03 µM vs IC <sub>50</sub> =2.90±0.98 Isoginkgetin control vs IC <sub>50</sub> =0.75 nM Orlistat control                                                                                      | Ad.In                   | <i>Hypericum</i> spp., -, -                              | [148] |
| <b>Chromanone</b> | Aucherine A                                       | Cell viability                       | <i>In vitro</i> MDA-MB, EJ, SKW-3, HL-60, HL-60/DOX cell | <b>Decreased</b> cell viability                                                                         | <b>Decreased:</b> Procaspace-9 activation, Bcl-xl expression Moderate cytotoxicity vs etoposide control                                                                                                                | AC                      | <i>Hypericum aucheri</i> Jaub. & Spach, AP, DCM (MeOH f) | [162] |
| <b>Chromanone</b> | Aucherine B                                       | Cell viability                       | <i>In vitro</i> MDA-MB, EJ, SKW-3, HL-60, HL-60/DOX cell | <b>Decreased</b> cell viability                                                                         | <b>Decreased:</b> Procaspace-9 activation, Bcl-xl expression Moderate cytotoxicity vs etoposide control                                                                                                                | AC                      | <i>Hypericum aucheri</i> Jaub. & Spach, AP, DCM (MeOH f) | [162] |
| <b>Chromanone</b> | Aucherine C                                       | Cell viability                       | <i>In vitro</i> MDA-MB, EJ, SKW-3, HL-60, HL-60/DOX cell | <b>Decreased</b> cell viability                                                                         | <b>Decreased:</b> Procaspace-9 activation. Bcl-xl expression Moderate cytotoxicity vs etoposide control                                                                                                                | AC                      | <i>Hypericum aucheri</i> Jaub. & Spach, AP, DCM (MeOH f) | [162] |
| <b>Chromone</b>   | (S)-(+)-5,7-dihydroxy-2-(1-methylpropyl) chromone | RXRα transcription<br>Cell viability | <i>In vitro</i> 293T, HeLa cells                         | <b>Induced</b> apoptosis<br><b>Inhibited</b> HeLa cells proliferation (selectively), RXRα transcription | <b>Increased:</b> caspase-8 activation, PARP cleavage                                                                                                                                                                  | AC                      | <i>Hypericum elodeoides</i> Choisy, WP, EtOH             | [163] |
| <b>Flavanol</b>   | (-) epicatechin                                   | Cell viability, Oxidative stress     | <i>In vitro</i> PC12, BV-2 cells                         | <b>Increased</b> cell viability<br><b>Decreased</b> NO LPS induced production                           | Cell viability: 47.61 - 83.26% vs 64.92 - 89.34 % captopril control<br>IC <sub>50</sub> = 3.37 ± 0.13 µM vs IC <sub>50</sub> = 1.07 ± 0.04 µM Quercetin control vs IC <sub>50</sub> = 2.6 ± 0.06 µM Fluoxetine control | AI                      | <i>Hypericum elatoides</i> R.Keller, AP, MeOH            | [164] |

| Compound Class   | Compound          | Measurement                      | Method                           |                                      | Outcome                                                                                                                                                             | Therapeutic Application | Species, Plant Part and Extract                  | Ref # |
|------------------|-------------------|----------------------------------|----------------------------------|--------------------------------------|---------------------------------------------------------------------------------------------------------------------------------------------------------------------|-------------------------|--------------------------------------------------|-------|
| <b>Flavanone</b> | Calycinigin A     | Cell viability, Oxidative stress | <i>In vitro</i> HeLa cells       | <b>Decreased</b> cell viability; ROS | Cell viability<br>IC <sub>50</sub> =9.7±1.8µM vs<br>IC <sub>50</sub> =0.05±0.01µM<br>Podophyllotoxin control<br>Antioxidant activity (Trolox equivalents)= 2.3±0.2  | AC<br>CP                | <i>Hypericum calycinum</i> L., S, EtOH           | [165] |
| <b>Flavanone</b> | Exiguaflavanone J | Cell viability, Oxidative stress | <i>In vitro</i> HeLa cells       | <b>Decreased</b> cell viability; ROS | Cell viability<br>IC <sub>50</sub> =11.6±0.9µM vs<br>IC <sub>50</sub> =0.05±0.01µM<br>Podophyllotoxin control<br>Antioxidant activity (Trolox equivalents)= 0.6±0.1 | AC<br>CP                | <i>Hypericum calycinum</i> L., S, EtOH           | [165] |
| <b>Flavanone</b> | Exiguaflavanone I | Cell viability, Oxidative stress | <i>In vitro</i> HeLa cells       | <b>Decreased</b> cell viability; ROS | Cell viability<br>IC <sub>50</sub> =19.3±1.5µM vs<br>IC <sub>50</sub> =0.05±0.01µM<br>Podophyllotoxin control<br>Antioxidant activity (Trolox equivalents)= 0.6±0.1 | AC<br>CP                | <i>Hypericum calycinum</i> L., S, EtOH           | [165] |
| <b>Flavanone</b> | Exiguaflavanone C | Cell viability, Oxidative stress | <i>In vitro</i> HeLa cells       | <b>Decreased</b> cell viability; ROS | Cell viability<br>IC <sub>50</sub> =40.7±2.4µM vs<br>IC <sub>50</sub> =0.05±0.01µM<br>Podophyllotoxin control<br>Antioxidant activity (Trolox equivalents)= 1.6±0.2 | AC<br>CP                | <i>Hypericum calycinum</i> L., S, EtOH           | [165] |
| <b>Flavanone</b> | Hyperelatone B    | Cell viability, Oxidative stress | <i>In vitro</i> PC12, BV-2 cells | <b>Increased</b> cell viability      | Cell viability: 64.38 - 91.98% vs 64.92 - 89.34 % captopril control                                                                                                 | AI                      | <i>Hypericum elatoides</i><br>R.Keller, AP, MeOH | [164] |

| Compound Class   | Compound                                                  | Measurement                                      | Method                                                                      |                                                                                                                        | Outcome                                                                                                                                                                                                                                                 | Therapeutic Application | Species, Plant Part and Extract                         | Ref # |
|------------------|-----------------------------------------------------------|--------------------------------------------------|-----------------------------------------------------------------------------|------------------------------------------------------------------------------------------------------------------------|---------------------------------------------------------------------------------------------------------------------------------------------------------------------------------------------------------------------------------------------------------|-------------------------|---------------------------------------------------------|-------|
| <b>Flavanone</b> | Hyperelatone C                                            | Cell viability, Oxidative stress                 | <i>In vitro</i> PC12, BV-2 cells                                            | <b>Increased</b> cell viability                                                                                        | Cell viability: 51.51 - 90.96% vs 64.92 - 89.34 % captopril control                                                                                                                                                                                     | AI                      | <i>Hypericum elatoides</i> R.Keller, AP, MeOH           | [164] |
| <b>Flavanone</b> | Hyperelatone D                                            | Cell viability, Oxidative stress                 | <i>In vitro</i> PC12, BV-2 cells                                            | <b>Increased</b> cell viability<br><b>Decreased</b> NO LPS induced production                                          | Cell viability: 48.43 - 84.74% vs 64.92 - 89.34 % captopril control<br>IC <sub>50</sub> = 5.83 ± 0.23 µM vs IC <sub>50</sub> = 1.07 ± 0.04 µM Quercetin control vs IC <sub>50</sub> = 2.6 ± 0.06 µM Fluoxetine control                                  | AI                      | <i>Hypericum elatoides</i> R.Keller, AP, MeOH           | [164] |
| <b>Flavanone</b> | 5,7,3',5'-tetrahydroxyflavanone-7-O-glucoside             | HIV-1 reverse transcriptase associated functions | <i>In vitro</i> Vero-76, A549, HepG2, HeLa, TZM-bl, T-lymphoid Jurkat cells | <b>Decreased</b> viral RNase H and RDDP activity<br><b>Decreased</b> HIV-1 infected cells viability, HIV-1 replication | RNase H IC <sub>50</sub> =33±3µM vs IC <sub>50</sub> =8.1±2.2µM RDS1643 control vs IC <sub>50</sub> =12±3µM K-49 control<br>RDDP IC <sub>50</sub> =80±3µM vs IC <sub>50</sub> =0.013±0.004µM Efavirenz control vs IC <sub>50</sub> =11±2µM K-49 control | AV                      | <i>Hypericum hircinum</i> L., AP, EtOH                  | [166] |
| <b>Flavanone</b> | (S)-4',5-dihydroxy-7-methoxyflavanone                     | Lipoxygenase activity                            | <i>In vitro</i>                                                             | <b>Decreased</b> Lipoxygenase activity                                                                                 | IC <sub>50</sub> = 31.8 ± 0.10 µM vs IC <sub>50</sub> = 22.0 ± 0.04 µM Baicalein control                                                                                                                                                                | AI                      | <i>Hypericum oblongifolium</i> Choisy, WP, MeOH (Chl f) | [167] |
| <b>Flavanone</b> | 5,4'-dihydroxy-3'-methoxy-(6:7)-2,2-dimethylpyranoflavone | Cell viability                                   | <i>In vitro</i> DLD-1 cells                                                 | <b>Decreased</b> cell viability                                                                                        | IC <sub>50</sub> = 6.28µM                                                                                                                                                                                                                               | AC                      | <i>Hypericum nokoense</i> Ohwi, AP, MeOH                | [168] |

| Compound Class    | Compound                                    | Measurement                    | Method                                 |                                                        | Outcome                                                                                                                                                      | Therapeutic Application | Species, Plant Part and Extract                        | Ref # |
|-------------------|---------------------------------------------|--------------------------------|----------------------------------------|--------------------------------------------------------|--------------------------------------------------------------------------------------------------------------------------------------------------------------|-------------------------|--------------------------------------------------------|-------|
| <b>Flavanonol</b> | taxifolin-7-O- $\alpha$ -L-rhamnopyranoside | Bacterial susceptibility       | <i>In vitro</i> MRSA                   | Active against all tested strains (selective activity) | MIC = 64-8 $\mu$ g/mL vs MIC = 128-16 $\mu$ g/mL Ampicillin control vs MIC = 512-32 $\mu$ g/mL Ceftazidime control vs MIC=0.96 $\mu$ g/mL Vancomycin control | AM                      | <i>Hypericum japonicum</i> Thunb., AP, -               | [169] |
| <b>Flavonoid</b>  | Quercetin                                   | Antimicrobial activity         | <i>In vitro</i> antitrypanosomal model | <b>Decreased</b> trypanosomal viability                | IC <sub>50</sub> = 7.52 $\mu$ M IC <sub>90</sub> = 9.76 $\mu$ M                                                                                              | AP                      | <i>Hypericum afrum</i> Lam., AP, EtOH                  | [170] |
| <b>Flavonoid</b>  | Myricetin                                   | Antimicrobial activity         | <i>In vitro</i> antitrypanosomal model | <b>Decreased</b> trypanosomal viability                | IC <sub>50</sub> = 5.71 $\mu$ M IC <sub>90</sub> = 7.97 $\mu$ M                                                                                              | AP                      | <i>Hypericum afrum</i> Lam., AP, EtOH                  | [170] |
| <b>Flavonoid</b>  | Astragalin                                  | $\alpha$ -glucosidase activity | <i>In vitro</i> model                  | <b>Decreased</b> $\alpha$ -glucosidase activity        |                                                                                                                                                              | ADb                     | <i>Hypericum attenuatum</i> Fisch. ex Choisy, AP, EtOH | [171] |
| <b>Flavonoid</b>  | Guaijaverin                                 | $\alpha$ -glucosidase activity | <i>In vitro</i> model                  | <b>Decreased</b> $\alpha$ -glucosidase activity        |                                                                                                                                                              | ADb                     | <i>Hypericum attenuatum</i> Fisch. ex Choisy, AP, EtOH | [171] |
| <b>Flavonoid</b>  | Quercetin                                   | $\alpha$ -glucosidase activity | <i>In vitro</i> model                  | <b>Decreased</b> $\alpha$ -glucosidase activity        |                                                                                                                                                              | ADb                     | <i>Hypericum attenuatum</i> Fisch. ex Choisy, AP, EtOH | [171] |

| Compound Class   | Compound                                               | Measurement         | Method                                             | Outcome                                                                                                                                                           |                                                                                                                                                                                                     | Therapeutic Application | Species, Plant Part and Extract                | Ref # |
|------------------|--------------------------------------------------------|---------------------|----------------------------------------------------|-------------------------------------------------------------------------------------------------------------------------------------------------------------------|-----------------------------------------------------------------------------------------------------------------------------------------------------------------------------------------------------|-------------------------|------------------------------------------------|-------|
| <b>Flavonoid</b> | Quercetin                                              | Cell viability      | <i>In vivo</i> hepatotoxicity rat model            | <b>Decreased</b> induced liver injury, oxidative stress                                                                                                           | <b>Decreased</b> MDA, ALT, AST, DBIL, TBIL, TBA and $\gamma$ -GGT levels; PTGS2, CYP7A1, IL-1 $\beta$ , TNF- $\alpha$ expression<br><b>Increased</b> SOD and GSH-Px levels; BCL2 and FXR expression | CP                      | <i>Hypericum japonicum</i> Thunb., -, -        | [172] |
| <b>Flavonoid</b> | Folecitin                                              | Oxidative stress    | <i>In vivo</i> rat model                           | <b>Decreased</b> EtOH induced oxidative stress, p-JNK expression, NLRP3-inflammasome complexation<br><b>Decreased</b> caspase-3, BAX, BCL-2 and PARP-1 expression | <b>Decreased</b> neuroinflammatory and neurodegenerative protein markers                                                                                                                            | CP                      | <i>Hypericum oblongifolium</i> Choisy, L, MeOH | [173] |
| <b>Flavonoid</b> | Quercetin-3-O- $\alpha$ -L-rhamnoside                  | Glucose consumption | <i>In vitro</i> insulin-resistant HepG2 cell model | <b>Increased</b> glucose consumption in hyperglycemic induced HepG2 cells<br><b>Increased</b> PPAR $\gamma$ expression                                            |                                                                                                                                                                                                     | ADb                     | <i>Hypericum patulum</i> Thunb., WP, EtOH      | [174] |
| <b>Flavonoid</b> | Quercetin-3-O-(4-methoxy)- $\alpha$ -L-rhamnopyranosyl | Glucose consumption | <i>In vitro</i> insulin-resistant HepG2 cell model | <b>Increased</b> glucose consumption in hyperglycemic induced HepG2 cells<br><b>Increased</b> PPAR $\gamma$ expression                                            |                                                                                                                                                                                                     | ADb                     | <i>Hypericum patulum</i> Thunb., WP, EtOH      | [174] |



| Compound Class   | Compound                                                 | Measurement                      | Method                                             | Outcome                                                                                                                | Therapeutic Application                                                                                                                                                        | Species, Plant Part and Extract                     | Ref # |
|------------------|----------------------------------------------------------|----------------------------------|----------------------------------------------------|------------------------------------------------------------------------------------------------------------------------|--------------------------------------------------------------------------------------------------------------------------------------------------------------------------------|-----------------------------------------------------|-------|
| <b>Flavonoid</b> | Hyperoside (Quercetin-3-O- $\beta$ -D-galactopyranoside) | Glucose consumption              | <i>In vitro</i> insulin-resistant HepG2 cell model | <b>Increased</b> glucose consumption in hyperglycemic induced HepG2 cells<br><b>Increased</b> PPAR $\gamma$ expression | ADb                                                                                                                                                                            | <i>Hypericum patulum</i> Thunb., WP, EtOH           | [174] |
| <b>Flavonoid</b> | Astilbin                                                 | Cell viability, Oxidative stress | <i>In vitro/In vivo</i> osteoarthritis model       | <b>Increased</b> cell viability                                                                                        | <b>Decreased</b> NO, PGE2, TNF $\alpha$ , IL-6 production<br><b>Decreased</b> iNOS, COX-2, MMP13, ADAMTS5 expression<br><b>Increased</b> <i>in vivo</i> chondrocyte protection | AI CP<br><i>Hypericum perforatum</i> L., -, -       | [175] |
| <b>Flavonoid</b> | Hyperoside (Quercetin-3-O- $\beta$ -D-galactopyranoside) | Oxidative stress                 | <i>In vitro/In vivo</i> induced liver injury model | <b>Decreased</b> oxidative stress and CCl4 induced liver damage                                                        | <b>Decreased</b> MDA levels, PHLPP2 expression<br><b>Increased</b> SOD, Nrf2 translocation, HO-1 expression                                                                    | AI, IM<br><i>Hypericum perforatum</i> L., -, -      | [176] |
| <b>Flavonoid</b> | Myricetin 3-O-a-L-rhamnopyranoside                       | Cell viability, oxidative stress | <i>In vitro</i> BV-2 cell lines                    | <b>Decreased</b> LPS induced NO production                                                                             | IC <sub>50</sub> = 4.90 $\pm$ 0.60 $\mu$ M vs IC <sub>50</sub> =4.00 $\pm$ 0.23 $\mu$ M Quercetin control                                                                      | CP<br><i>Hypericum przewalskii</i> Maxim., AP, MeOH | [154] |
| <b>Flavonoid</b> | Quercetin 3-O-a-L-rhamnopyranoside                       | Cell viability, oxidative stress | <i>In vitro</i> BV-2 cell lines                    | <b>Decreased</b> LPS induced NO production                                                                             | IC <sub>50</sub> = 1.05 $\pm$ 0.03 $\mu$ M vs IC <sub>50</sub> =4.00 $\pm$ 0.23 $\mu$ M Quercetin control                                                                      | CP<br><i>Hypericum przewalskii</i> Maxim., AP, MeOH | [154] |
| <b>Flavonoid</b> | Quercetin 3-O-glucopyranoside                            | Cell viability, oxidative stress | <i>In vitro</i> BV-2 cell lines                    | <b>Decreased</b> LPS induced NO production                                                                             | IC <sub>50</sub> = 1.26 $\pm$ 0.04 $\mu$ M vs IC <sub>50</sub> =4.00 $\pm$ 0.23 $\mu$ M Quercetin control                                                                      | CP<br><i>Hypericum przewalskii</i> Maxim., AP, MeOH | [154] |

| Compound Class | Compound                                         | Measurement                      | Method                                                                                                                        | Outcome                                                       | Therapeutic Application                                                                                            | Species, Plant Part and Extract | Ref #                                      |       |
|----------------|--------------------------------------------------|----------------------------------|-------------------------------------------------------------------------------------------------------------------------------|---------------------------------------------------------------|--------------------------------------------------------------------------------------------------------------------|---------------------------------|--------------------------------------------|-------|
| Flavonoid      | Quercetin                                        | Cell viability, Oxidative stress | <i>In vitro</i> A375, MDA-MB-231, SiHa, SHSY-5Y cancer cell lines; LPS stimulated RAW264,7, THP-1 and BV-2 inflammatory model | <b>Decreased</b> oxidative stress induced inflammatory damage | IC <sub>50</sub> = 15.92±0.63 - 10.59±0.55 µM vs IC <sub>50</sub> =19.37±0.72 - 15.20±1.10 µM Indomethacin control | AI                              | <i>Hypericum sampsonii</i> Hance, WP, EtOH | [136] |
| Flavonoid      | Hyperoside (Quercetin-3-O-β-D-galactopyranoside) | Cell viability, Oxidative stress | <i>In vitro</i> A375, MDA-MB-231, SiHa, SHSY-5Y cancer cell lines; LPS stimulated RAW264,7, THP-1 and BV-2 inflammatory model | <b>Decreased</b> oxidative stress induced inflammatory damage | IC <sub>50</sub> = 26.87±0.55 - 21.70±1.94 µM vs IC <sub>50</sub> =19.37±0.72 - 15.20±1.10 µM Indomethacin control | AI                              | <i>Hypericum sampsonii</i> Hance, WP, EtOH | [136] |
| Flavonoid      | Quercetin-3-O-arabinoside                        | Cell viability, Oxidative stress | <i>In vitro</i> A375, MDA-MB-231, SiHa, SHSY-5Y cancer cell lines; LPS stimulated RAW264,7, THP-1 and BV-2 inflammatory model | <b>Decreased</b> oxidative stress induced inflammatory damage | IC <sub>50</sub> = 42.75±1.16 - 31.82±0.34 µM vs IC <sub>50</sub> =19.37±0.72 - 15.20±1.10 µM Indomethacin control | AI                              | <i>Hypericum sampsonii</i> Hance, WP, EtOH | [136] |

| Compound Class | Compound                       | Measurement                      | Method                                                                                                                        | Outcome                                                       | Therapeutic Application                                                                                            | Species, Plant Part and Extract | Ref #                                      |       |
|----------------|--------------------------------|----------------------------------|-------------------------------------------------------------------------------------------------------------------------------|---------------------------------------------------------------|--------------------------------------------------------------------------------------------------------------------|---------------------------------|--------------------------------------------|-------|
| Flavonoid      | Rutin (Quercetin 3-rutinoside) | Cell viability, Oxidative stress | <i>In vitro</i> A375, MDA-MB-231, SiHa, SHSY-5Y cancer cell lines; LPS stimulated RAW264,7, THP-1 and BV-2 inflammatory model | <b>Decreased</b> oxidative stress induced inflammatory damage | IC <sub>50</sub> = 34.20±0.57 - 27.17±0.66 µM vs IC <sub>50</sub> =19.37±0.72 - 15.20±1.10 µM Indomethacin control | AI                              | <i>Hypericum sampsonii</i> Hance, WP, EtOH | [136] |
| Flavonoid      | Quercitrin                     | Cell viability, Oxidative stress | <i>In vitro</i> A375, MDA-MB-231, SiHa, SHSY-5Y cancer cell lines; LPS stimulated RAW264,7, THP-1 and BV-2 inflammatory model | <b>Decreased</b> oxidative stress induced inflammatory damage | IC <sub>50</sub> = 38.71±1.06 - 30.66±2.29 µM vs IC <sub>50</sub> =19.37±0.72 - 15.20±1.10 µM Indomethacin control | AI                              | <i>Hypericum sampsonii</i> Hance, WP, EtOH | [136] |
| Flavonoid      | Kaempferol                     | Cell viability, Oxidative stress | <i>In vitro</i> A375, MDA-MB-231, SiHa, SHSY-5Y cancer cell lines; LPS stimulated RAW264,7, THP-1 and BV-2 inflammatory model | <b>Decreased</b> oxidative stress induced inflammatory damage | IC <sub>50</sub> = 29.57±0.82 - 23.50±1.32 µM vs IC <sub>50</sub> =19.37±0.72 - 15.20±1.10 µM Indomethacin control | AI                              | <i>Hypericum sampsonii</i> Hance, WP, EtOH | [136] |

| Compound Class | Compound        | Measurement                      | Method                                                                                                                        | Outcome                                                                                                                | Therapeutic Application                                                                                                                                                                                                               | Species, Plant Part and Extract                        | Ref # |
|----------------|-----------------|----------------------------------|-------------------------------------------------------------------------------------------------------------------------------|------------------------------------------------------------------------------------------------------------------------|---------------------------------------------------------------------------------------------------------------------------------------------------------------------------------------------------------------------------------------|--------------------------------------------------------|-------|
| Flavonoid      | 3,8"-biapigenin | Cell viability, Oxidative stress | <i>In vitro</i> A375, MDA-MB-231, SiHa, SHSY-5Y cancer cell lines; LPS stimulated RAW264,7, THP-1 and BV-2 inflammatory model | <b>Decreased</b> cell viability (selective cytotoxicity) <b>Decreased</b> oxidative stress induced inflammatory damage | IC <sub>50</sub> = 133.50±2.49 - 37.45±0.52 µM vs IC <sub>50</sub> =15.74±0.13 - 5.14±0.16 µM Cisplatin control<br>IC <sub>50</sub> = 25.34±0.40 - 19.05±0.68 µM vs IC <sub>50</sub> =19.37±0.72 - 15.20±1.10 µM Indomethacin control | AC<br>AI<br><i>Hypericum sampsonii</i> Hance, WP, EtOH | [136] |
| Flavonoid      | Naringenin      | Cell viability, Oxidative stress | <i>In vitro</i> A375, MDA-MB-231, SiHa, SHSY-5Y cancer cell lines; LPS stimulated RAW264,7, THP-1 and BV-2 inflammatory model | <b>Decreased</b> cell viability (selective cytotoxicity) <b>Decreased</b> oxidative stress induced inflammatory damage | IC <sub>50</sub> = >200 - 41.70±3.26 µM vs IC <sub>50</sub> =15.74±0.13 - 5.14±0.16 µM Cisplatin control<br>IC <sub>50</sub> = 31.16±0.71 - 25.51±0.89 µM vs IC <sub>50</sub> =19.37±0.72 - 15.20±1.10 µM Indomethacin control        | AC<br>AI<br><i>Hypericum sampsonii</i> Hance, WP, EtOH | [136] |
| Flavonoid      | (+)-catechin    | Cell viability, Oxidative stress | <i>In vitro</i> A375, MDA-MB-231, SiHa, SHSY-5Y cancer cell lines; LPS stimulated RAW264,7, THP-1 and BV-2 inflammatory model | <b>Decreased</b> oxidative stress induced inflammatory damage                                                          | IC <sub>50</sub> = 33.20±0.61 - 25.31±0.40 µM vs IC <sub>50</sub> =19.37±0.72 - 15.20±1.10 µM Indomethacin control                                                                                                                    | AI<br><i>Hypericum sampsonii</i> Hance, WP, EtOH       | [136] |
| Flavonoid      | Myricetin       | Pancreatic lipase activity       | <i>In vitro</i> pancreatic lipase model                                                                                       | <b>Decreased</b> pancreatic lipase activity                                                                            | IC <sub>50</sub> = 6.94±1.40 µM vs IC <sub>50</sub> =2.90±0.98 Isoginkgetin control vs IC <sub>50</sub> =0.75 nM Orlistat control                                                                                                     | Ad.In<br><i>Hypericum</i> spp., -, -                   | [148] |

| Compound Class   | Compound                                         | Measurement                        | Method                                                             |                  | Outcome                    | Therapeutic Application                                                                                                           | Species, Plant Part and Extract            | Ref # |
|------------------|--------------------------------------------------|------------------------------------|--------------------------------------------------------------------|------------------|----------------------------|-----------------------------------------------------------------------------------------------------------------------------------|--------------------------------------------|-------|
| <b>Flavonoid</b> | Luteolin                                         | Pancreatic lipase activity         | <i>In vitro</i> pancreatic lipase model                            | <b>Decreased</b> | pancreatic lipase activity | IC <sub>50</sub> = 3.43±0.24 µM vs IC <sub>50</sub> =2.90±0.98 Isoginkgetin control vs IC <sub>50</sub> =0.75 nM Orlistat control | Ad.In <i>Hypericum</i> spp., -, -          | [148] |
| <b>Flavonoid</b> | Apigenin                                         | Pancreatic lipase activity         | <i>In vitro</i> pancreatic lipase model                            | <b>Decreased</b> | pancreatic lipase activity | IC <sub>50</sub> = 2.99±0.26 µM vs IC <sub>50</sub> =2.90±0.98 Isoginkgetin control vs IC <sub>50</sub> =0.75 nM Orlistat control | Ad.In <i>Hypericum</i> spp., -, -          | [148] |
| <b>Flavonoid</b> | Procyanidin                                      | Pancreatic lipase activity         | <i>In vitro</i> pancreatic lipase model                            | <b>Decreased</b> | pancreatic lipase activity | IC <sub>50</sub> = 3.14±0.32 µM vs IC <sub>50</sub> =2.90±0.98 Isoginkgetin control vs IC <sub>50</sub> =0.75 nM Orlistat control | Ad.In <i>Hypericum</i> spp., -, -          | [148] |
| <b>Flavonoid</b> | Hyperoside (Quercetin-3-O-β-D-galactopyranoside) | Cell viability                     | <i>In vitro/ In vivo</i> T790M-+ Non small cells lung cancer model | <b>Decreased</b> | cell proliferation         | <b>Decreased</b> CCAT1 expression                                                                                                 | AC <i>Hypericum</i> spp., -, -             | [177] |
| <b>Flavonoid</b> | Quercetin                                        | GABA levels, depressive behaviours | <i>In vivo</i> rat induced anxiety model                           | <b>Increased</b> | GABA levels                | <b>Increased</b> apoptosis                                                                                                        | AD <i>Hypericum</i> spp., -, -             | [178] |
| <b>Flavonoid</b> | Quercetin 3-(6''-O-caffeoyl)-β-3-D-galactoside   | COX-2 Activity                     | <i>In vitro</i> COX-2 model                                        | <b>Decreased</b> | COX-2 activity             | <b>Decreased</b> COX-2 activity                                                                                                   | AI <i>Hypericum monogynum</i> L., Fl, MeOH | [179] |

| Compound Class | Compound                                         | Measurement    | Method                                                        | Outcome                                                                                                                                          |                                                                                       | Therapeutic Application | Species, Plant Part and Extract                    | Ref # |
|----------------|--------------------------------------------------|----------------|---------------------------------------------------------------|--------------------------------------------------------------------------------------------------------------------------------------------------|---------------------------------------------------------------------------------------|-------------------------|----------------------------------------------------|-------|
| Flavonoid      | 3,8''-biapigenin                                 | COX-2 Activity | <i>In vitro</i> COX-2 model                                   | Decreased COX-2 activity                                                                                                                         | IC <sub>50</sub> = 1.655±0.098μM vs IC <sub>50</sub> =0.016±0.002μM celecoxib control | AI                      | <i>Hypericum monogynum</i> L., Fl, MeOH            | [179] |
| Flavonoid      | Quercetin-3-O-α-L-rhamnoside                     | COX-2 Activity | <i>In vitro</i> COX-2 model                                   | Decreased COX-2 activity                                                                                                                         | IC <sub>50</sub> = 0.260±0.028μM vs IC <sub>50</sub> =0.016±0.002μM celecoxib control | AI                      | <i>Hypericum monogynum</i> L., Fl, MeOH            | [179] |
| Flavonoid      | Taxifoline-3-O-rhamnoside                        | COX-2 Activity | <i>In vitro</i> COX-2 model                                   | Decreased COX-2 activity                                                                                                                         | IC <sub>50</sub> = 0.265±0.024μM vs IC <sub>50</sub> =0.016±0.002μM celecoxib control | AI                      | <i>Hypericum monogynum</i> L., Fl, MeOH            | [179] |
| Flavonol       | Hyperoside (Quercetin-3-O-β-D-galactopyranoside) | Cell viability | <i>In vitro</i> LPS-induced HT22 cells                        | Increased cell viability; Il-1β, IL-6, IL-8, TNFα, ROS, MDA, Bax, caspase-3 activity; Increased CAT, SOD, GSH, Bcl-2, BDNF, TrkB, NGF expression | Decreased oxidative stress, LPS-induced inflammation, oxidative stress, apoptosis     | CP                      | <i>Hypericum</i> spp., -, -                        | [180] |
| Flavonol       | Quercetin                                        | Cell viability | <i>In vitro</i> HUVEC cells<br><i>In vivo</i> zebrafish model | Decreased angiogenesis; cell proliferation and survival<br>Increased apoptosis                                                                   | Decreased VEGFR2 phosphorylation                                                      | AC                      | <i>Hypericum attenuatum</i> Fisch. ex Choisy, -, - | [181] |

| Compound Class | Compound                                         | Measurement                                      | Method                                                               | Outcome                                                                                                  | Therapeutic Application                                                                                                                                                                                                                                                                                   | Species, Plant Part and Extract | Ref #                                              |       |
|----------------|--------------------------------------------------|--------------------------------------------------|----------------------------------------------------------------------|----------------------------------------------------------------------------------------------------------|-----------------------------------------------------------------------------------------------------------------------------------------------------------------------------------------------------------------------------------------------------------------------------------------------------------|---------------------------------|----------------------------------------------------|-------|
| Flavonol       | Hyperoside (Quercetin-3-O-β-D-galactopyranoside) | Stress-induced depressive behaviours             | In vivo mouse model                                                  | Decreased immobility time in FST; crossing, rearing and grooming in open field test                      | Increased D2-like receptors activation                                                                                                                                                                                                                                                                    | AD                              | Hypericum caprifoliatum Cham. & Schltdl., AP, MeOH | [182] |
| Flavonol       | Quercetin                                        | HIV-1 reverse transcriptase associated functions | In vitro Vero-76, A549, HepG2, HeLa, TZM-bl, T-lymphoid Jurkat cells | Decreased viral RNAse H and RDDP activity<br>Decreased HIV-1 infected cells viability, HIV-1 replication | RNAse H<br>IC <sub>50</sub> =4.5±0.5μM vs<br>IC <sub>50</sub> =8.1±2.2μM<br>RDS1643 control vs<br>IC <sub>50</sub> =12±3μM K-49 control<br>RDDP IC <sub>50</sub> =21±2μM vs<br>IC <sub>50</sub> =0.013±0.004μM<br>Efavirenz control vs<br>IC <sub>50</sub> =11±2μM K-49 control                           | AV                              | Hypericum hircinum L., AP, EtOH                    | [166] |
| Flavonol       | Quercetin 7-rhamnoside                           | Cell viability, Oxidative stress                 | In vitro L-02 cells                                                  | Increased cell viability<br>Decreased oxidative stress                                                   | IC <sub>50</sub> =118.75μM vs<br>IC <sub>50</sub> =313.69μM BHT control against H2O2<br>IC <sub>50</sub> =128.47μM vs<br>IC <sub>50</sub> =172.18μM Trolox control<br>ABTS scavenging<br>Higher FeSO4 reduction capacity vs Trolox control<br>Increased SOD, CAT, GSH<br>Decreased MDA, ALT, AST, LDH, TG | CP                              | Hypericum japonicum Thunb., -, Water               | [183] |

| Compound Class  | Compound    | Measurement           | Method                                  |                                                                                                             | Outcome                                                                                                                                                                                                                        | Therapeutic Application | Species, Plant Part and Extract              | Ref # |
|-----------------|-------------|-----------------------|-----------------------------------------|-------------------------------------------------------------------------------------------------------------|--------------------------------------------------------------------------------------------------------------------------------------------------------------------------------------------------------------------------------|-------------------------|----------------------------------------------|-------|
| <b>Flavonol</b> | Quercetin   | Cell viability        | <i>In vitro</i> L-02 cells              | <b>Increased</b> cell viability<br><b>Decreased</b> apoptosis                                               | <b>Decreased</b> ROS production, intracellular Ca <sup>2+</sup> accumulation, GSH depletion                                                                                                                                    | CP                      | <i>Hypericum japonicum</i> Thunb., WP, Water | [184] |
| <b>Flavonol</b> | Quercetin   | Tyrosinase activity   | <i>In vitro</i>                         | <b>Decreased</b> tyrosinase activity                                                                        | IC <sub>50</sub> = 14.29±0.3 µM vs IC <sub>50</sub> =110.4±1.96 µM Arbutin control vs IC <sub>50</sub> =8.0±0.5 µM Kojic acid control<br>Inhibition 99.7±0.28 % vs 86.01±1.6% Arbutin control vs 99.8±0.5 % Kojic acid control | Cosm                    | <i>Hypericum laricifolium</i> Juss., -, MeOH | [185] |
| <b>Flavonol</b> | Miquelianin | Expression modulation | <i>In vitro</i> SH-SY5Y cells           | <b>Regulated</b> gene expression, vs citalopram control                                                     | <b>Suppressed</b> FKBP5 mRNA induced increase expression, CREB induced decrease expression<br><b>Increased</b> GRIK4 mRNA expression, VEGF mRNA expression<br><b>Decreased</b> NET mRNA expression                             | AD                      | <i>Hypericum perforatum</i> L., -, -         | [15]  |
| <b>Flavonol</b> | Quercetin   | Radical scavenging    | <i>In vitro</i> HepG <sub>2</sub> cells | Coadministration of compounds included in formulated nanoparticles showed free radicals scavenging activity |                                                                                                                                                                                                                                | CP                      | <i>Hypericum perforatum</i> L., AP, MeOH     | [161] |



| Compound Class  | Compound                                                 | Measurement        | Method                                    | Outcome                                                                                                                  |                                                                                                                                                                                                                                                                            | Therapeutic Application | Species, Plant Part and Extract | Ref # |
|-----------------|----------------------------------------------------------|--------------------|-------------------------------------------|--------------------------------------------------------------------------------------------------------------------------|----------------------------------------------------------------------------------------------------------------------------------------------------------------------------------------------------------------------------------------------------------------------------|-------------------------|---------------------------------|-------|
| <b>Flavonol</b> | Hyperoside (Quercetin-3-O- $\beta$ -D-galactopyranoside) | Cell viability     | <i>In vitro</i><br>A549 cells             | <b>Increased</b> apoptosis<br><b>Decreased</b> cell viability                                                            | Increased LC3-II expression; ERK1/2 phosphorylation<br>Decreased Akt, mTOR, p70S6K, 4E-BP1 phosphorylation                                                                                                                                                                 | AC                      | <i>Hypericum</i> spp., -, -     | [186] |
| <b>Flavonol</b> | Hyperoside (Quercetin-3-O- $\beta$ -D-galactopyranoside) | Tumour progression | <i>In vitro</i><br>A431, A432, HS-4 cells | <b>Decreased</b> DMBA/TPA induced epidermal thickness<br><b>Decreased</b> tumour size in animals treated with hyperoside | <b>Increased:</b> Bcl-2 and Bcl-xl downregulation, Bax and Bad upregulation, Cytochrome C, caspase-9, caspase-3, PTEN, Beclin-1 and LC3I/II, Phosphorylated levels of AMPK and MAPK, PARP cleavage<br><b>Decreased:</b> Phosphorylated levels of PI3K, AURKA, AKT and mTOR | AC                      | <i>Hypericum</i> spp., -, -     | [187] |

| Compound Class  | Compound                                                 | Measurement                | Method                                 | Outcome                                                                                                                                                                       | Therapeutic Application                                                                                                                                                                                                                                                                                         | Species, Plant Part and Extract    | Ref # |
|-----------------|----------------------------------------------------------|----------------------------|----------------------------------------|-------------------------------------------------------------------------------------------------------------------------------------------------------------------------------|-----------------------------------------------------------------------------------------------------------------------------------------------------------------------------------------------------------------------------------------------------------------------------------------------------------------|------------------------------------|-------|
| <b>Flavonol</b> | Hyperoside (Quercetin-3-O- $\beta$ -D-galactopyranoside) | Tumour progression         | <i>In vitro</i> A431, A432, HS-4 cells | <b>Reduced</b> viability, migration, colony formation, apoptosis and autophagy of skin cancer cells vs no treatment                                                           | <b>Increased:</b> apoptosis, downregulation of Bcl-2 and Bcl-xl, upregulation of Bax, Bad, Cytochrome C and Apaf-1, caspase-9, caspase-3, PARP cleavage, PTEN, Beclin-1 and LC3II<br>Reversion of DMBA/TPA induced changes in PI3K, AKT, mTOR and AMPK<br><b>Decreased:</b> cell migration, p38 phosphorylation | AC<br><i>Hypericum</i> spp., -, -  | [187] |
| <b>Flavonol</b> | Hyperoside (Quercetin-3-O- $\beta$ -D-galactopyranoside) | Neuronal damage, autophagy | <i>In vivo</i> mouse model             | Protected against epilepsy-induced neuronal damage in the hippocampal CA3 region. Enhanced antioxidant levels and reduced levels of autophagy related proteins vs kainic acid | <b>Decreased:</b> LCI/II, Autophagy-related proteins, Beclin1, PI3K, AKT, MAPK, Overactivation of microglia and astrocytes<br><b>Increased:</b> SOD1, SOD2, DAPI neurons                                                                                                                                        | AEP<br><i>Hypericum</i> spp., -, - | [188] |

| Compound Class  | Compound                                                 | Measurement                                 | Method                              | Outcome                                                                                                                                                                | Therapeutic Application                                                                                                             | Species, Plant Part and Extract              | Ref # |
|-----------------|----------------------------------------------------------|---------------------------------------------|-------------------------------------|------------------------------------------------------------------------------------------------------------------------------------------------------------------------|-------------------------------------------------------------------------------------------------------------------------------------|----------------------------------------------|-------|
| <b>Flavonol</b> | Hyperoside (Quercetin-3-O- $\beta$ -D-galactopyranoside) | Cell viability, Oxidative stress            | <i>In vivo</i> mouse epilepsy model | <b>Decreased</b> autophagy via PI3K/Akt and MAPK pathways; Beclin1 expression; overactivation of microglia and astrocytes<br><b>Increased</b> SOD1 and SOD2 expression | Antioxidant vs sham group                                                                                                           | CP<br><i>Hypericum</i> spp., -, -            | [188] |
| <b>Flavonol</b> | Rutin (Quercetin 3-rutinoside)                           | DNase I activity                            | <i>In vitro</i>                     | <b>Decreased</b> DNase I activity                                                                                                                                      | DNase I Non-competitive inhibition<br>IC <sub>50</sub> = 108.90 $\pm$ 9.73 $\mu$ M vs IC <sub>50</sub> = 362.95 $\pm$ 44.37 $\mu$ M | CP<br><i>Hypericum</i> spp., L, S, Fl, Water | [189] |
| <b>Flavonol</b> | Hyperoside (Quercetin-3-O- $\beta$ -D-galactopyranoside) | Cell viability                              | <i>In vitro</i> A549 cells          | <b>Decreased</b> cell viability<br><b>Increased</b> apoptosis                                                                                                          | <b>Increased</b> MMP dissipation, Cyp C, AIF, Casp-9, Casp-3, p38MAPK and JNK phosphorylation vs control                            | AC<br><i>Hypericum</i> spp., -, -            | [190] |
| <b>Flavonol</b> | Quercitrin                                               | Hypericin cell permeation                   | <i>In vitro</i> CaCo-2 cells        | <b>Improved</b> permeation behaviour of hypericin                                                                                                                      |                                                                                                                                     | AC<br><i>Hypericum</i> spp., -, -            | [191] |
| <b>Flavonol</b> | Hyperoside (Quercetin-3-O- $\beta$ -D-galactopyranoside) | Stress-induced learning and memory deficits | <i>In vivo</i> mouse model          | <b>Reversed</b> depressive symptoms in forced swim test and sucrose preference test                                                                                    | <b>Increased</b> BDNF expression<br><b>Decreased</b> escape latency and swimming distance vs fluoxetine control                     | AD<br><i>Hypericum</i> spp., -, -            | [192] |

| Compound Class  | Compound                                                 | Measurement                                  | Method                                                                                      | Outcome                                                                                                                                                                                                                       |                                                                                                                                                 | Therapeutic Application | Species, Plant Part and Extract | Ref # |
|-----------------|----------------------------------------------------------|----------------------------------------------|---------------------------------------------------------------------------------------------|-------------------------------------------------------------------------------------------------------------------------------------------------------------------------------------------------------------------------------|-------------------------------------------------------------------------------------------------------------------------------------------------|-------------------------|---------------------------------|-------|
| <b>Flavonol</b> | Hyperoside (Quercetin-3-O- $\beta$ -D-galactopyranoside) | Cell viability                               | <i>In vitro</i> H1975 cells<br><i>In vivo</i> mouse model                                   | <b>Decreased</b> cell viability, proliferation and migration<br><b>Decreased</b> tumour volume ( <i>in vivo</i> )                                                                                                             | <b>Increased</b> apoptosis, Bax, Bad, Bak, Cytochrome C, Apaf-1, cleaved Casp-9, Casp-3. PARP<br><b>Decreased</b> Bcl-2, Bcl-xl, NF- $\kappa$ B | AC                      | <i>Hypericum</i> spp., -, -     | [193] |
| <b>Flavonol</b> | Hyperoside (Quercetin-3-O- $\beta$ -D-galactopyranoside) | Cell viability, FLS proliferation            | <i>In vitro</i> rheumatoid arthritis FLS<br><i>In vivo</i> rheumatoid arthritis mouse model | <b>Decreased</b> LPS induced rheumatoid arthritis FLSs proliferation and migration<br><b>Decreased</b> synovial hyperlasia, inflammatory cell infiltration, cartilage damage in collagen induced arthritis ( <i>in vivo</i> ) | <b>Decreased</b> LPS induced TNF $\alpha$ , IL-6, IL-1, MMP-9 expression; LPS induced NF- $\kappa$ B activation                                 | AI                      | <i>Hypericum</i> spp., -, -     | [194] |
| <b>Flavonol</b> | Hyperoside (Quercetin-3-O- $\beta$ -D-galactopyranoside) | Expression modulation, Vascular inflammation | <i>In vitro</i> HUVEC cells<br><i>In vivo</i> mouse model                                   | <b>Decreased</b> glucose induced vascular permeability, monocyte adhesion, CAMs expression, ROS formation, NF- $\kappa$ B activation                                                                                          | <b>Decreased</b> MCP-1, IL-8 expression, H2O2 formation, glucose induced p65 expression                                                         | ADb, AI                 | <i>Hypericum</i> spp., -, -     | [195] |

| Compound Class       | Compound                                                 | Measurement                                                                         | Method                                                                    | Outcome                                                                                                                                                                               | Therapeutic Application                                                                                                                                                                                                                                              | Species, Plant Part and Extract                        | Ref # |
|----------------------|----------------------------------------------------------|-------------------------------------------------------------------------------------|---------------------------------------------------------------------------|---------------------------------------------------------------------------------------------------------------------------------------------------------------------------------------|----------------------------------------------------------------------------------------------------------------------------------------------------------------------------------------------------------------------------------------------------------------------|--------------------------------------------------------|-------|
| <b>Flavonol</b>      | Quercetin                                                | Mitochondrial dysfunction, oxidative stress, dopamine demise, programmed cell death | <i>In vitro, Ex vivo</i>                                                  | <b>Increased</b> striatal nerve cells viability; ETC complex-I activity in damaged or normal dopaminergic neurons<br><b>Decreased</b> striatal dopamine loss and nigral GSH depletion | <b>Decreased</b> rotenone induced ROS formation, SOD activity, nigral catalase activity, NADPH-d induced activity                                                                                                                                                    | CP<br><i>Hypericum</i> spp., -, -                      | [196] |
| <b>Flavonol</b>      | Hyperoside (Quercetin-3-O- $\beta$ -D-galactopyranoside) | Cell Viability                                                                      | <i>In vitro</i> A $\beta$ 25–35-induced primary cultured cortical neurons | <b>Decreased</b> A $\beta$ 25–35-induced cytotoxicity and apoptosis                                                                                                                   | <b>Decreased</b> A $\beta$ -induced mitochondrial dysfunction, ROS formation Cytochrome C release, Bad/BclXL interaction, casp-9, casp-3, PARP                                                                                                                       | Alz<br><i>Hypericum</i> spp., -, -                     | [197] |
| <b>Flavonol</b>      | Isoquercetin                                             | Viral susceptibility                                                                | <i>In vitro</i> Vero, MDCK cells<br><i>In vivo</i> mouse model            | <b>Decreased</b> viral replication and lung pathology                                                                                                                                 | Viral replication inhibition: ED <sub>50</sub> =1.2 $\mu$ M vs ED <sub>50</sub> =1.4 $\mu$ M amantadine control vs ED <sub>50</sub> =0.5 $\mu$ M oseltamivir control<br><b>Decreased</b> virus titers, IFN- $\gamma$ , RANTES, iNOS expression (mice infected lungs) | AV<br><i>Hypericum</i> spp., -, -                      | [198] |
| <b>Flavonolignan</b> | Cinchonain Ib                                            | Cell viability, Oxidative stress                                                    | <i>In vitro</i> PC12, BV-2 cells                                          | <b>Increased</b> cell viability                                                                                                                                                       | Cell viability: 49.70 - 84.10% vs 64.92 - 89.34 % captopril control                                                                                                                                                                                                  | AI<br><i>Hypericum elatoides</i><br>R.Keller, AP, MeOH | [164] |

| Compound Class                         | Compound                                            | Measurement                      | Method                                                                                                                                                                                                                                   |                                   | Outcome                                                               | Therapeutic Application | Species, Plant Part and Extract                             | Ref # |
|----------------------------------------|-----------------------------------------------------|----------------------------------|------------------------------------------------------------------------------------------------------------------------------------------------------------------------------------------------------------------------------------------|-----------------------------------|-----------------------------------------------------------------------|-------------------------|-------------------------------------------------------------|-------|
| <b>Flavonolignan</b>                   | Cinchonain Ic                                       | Cell viability, Oxidative stress | <i>In vitro</i> PC12, BV-2 cells                                                                                                                                                                                                         | <b>Increased</b> cell viability   | Cell viability: 47.87 - 83.86% vs 64.92 - 89.34 % captopril control   | AI                      | <i>Hypericum elatoides</i><br>R.Keller, AP, MeOH            | [164] |
| <b>Hydroxycinnamic acid derivative</b> | 8,8-bis(dihydroconiferyl) diferulate                | Bacterial susceptibility         | <i>In vitro</i> <i>E. coli</i> (ATCC 8739 and AG102), <i>E. aerogenes</i> (ATCC 13048 and EA-CM64), <i>K. pneumoniae</i> (KP55 and ATCC 11296), <i>P. stuartii</i> (ATCC 29916, and PS2636), and <i>S. aureus</i> (ATCC 25923 and MRSA3) | <b>Decreased</b> bacterial growth | MIC range 0.5 - 2 µg/mL vs Chloramphenicol<br>MIC range 2 - 128 µg/mL | AM                      | <i>Hypericum roeperianum</i><br>Schimp. ex A.Rich., B, MeOH | [199] |
| <b>Hyperforin derived compound</b>     | Hydroxypropyl-β-cyclodextrin-tetracapped hyperforin | Wound healing                    | <i>In vitro</i> HaCaT cells                                                                                                                                                                                                              | <b>Improved</b> wound healing     | <b>Increased</b> intracellular Ca <sup>2+</sup> , ATP release         | S                       | <i>Hypericum</i> spp., -, -                                 | [200] |

| Compound Class        | Compound            | Measurement                      | Method                                                                                                                        | Outcome                                                                                                                | Therapeutic Application                                                                                                                                                                                                        | Species, Plant Part and Extract                              | Ref # |
|-----------------------|---------------------|----------------------------------|-------------------------------------------------------------------------------------------------------------------------------|------------------------------------------------------------------------------------------------------------------------|--------------------------------------------------------------------------------------------------------------------------------------------------------------------------------------------------------------------------------|--------------------------------------------------------------|-------|
| <b>Phenol</b>         | Gallic acid         | Cell viability, Oxidative stress | <i>In vitro</i> A375, MDA-MB-231, SiHa, SHSY-5Y cancer cell lines; LPS stimulated RAW264,7, THP-1 and BV-2 inflammatory model | <b>Decreased</b> cell viability (selective cytotoxicity) <b>Decreased</b> oxidative stress induced inflammatory damage | IC <sub>50</sub> = >200 - 36.75±0.83 µM vs IC <sub>50</sub> =15.74±0.13 - 5.14±0.16 µM Cisplatin control<br>IC <sub>50</sub> = 38.42±0.81 - 32.68±1.16 µM vs IC <sub>50</sub> =19.37±0.72 - 15.20±1.10 µM Indomethacin control | AC<br>AI<br><i>Hypericum sampsonii</i> Hance, WP, EtOH       | [136] |
| <b>Phenol</b>         | Protocatechuic acid | Cell viability, Oxidative stress | <i>In vitro</i> A375, MDA-MB-231, SiHa, SHSY-5Y cancer cell lines; LPS stimulated RAW264,7, THP-1 and BV-2 inflammatory model | <b>Decreased</b> cell viability (selective cytotoxicity) <b>Decreased</b> oxidative stress induced inflammatory damage | IC <sub>50</sub> = >200 - 53.73±1.26 µM vs IC <sub>50</sub> =15.74±0.13 - 5.14±0.16 µM Cisplatin control<br>IC <sub>50</sub> = 30.25±0.93 - 25.91±1.50 µM vs IC <sub>50</sub> =19.37±0.72 - 15.20±1.10 µM Indomethacin control | AC<br>AI<br><i>Hypericum sampsonii</i> Hance, WP, EtOH       | [136] |
| <b>Phloroglucinol</b> | Hyperattentin L     | Cell viability                   | <i>In vitro</i> HL-60, SMMC-7721, A-549, MCF-7, SW-480 cells                                                                  | <b>Decreased</b> cell viability (selective toxicity)                                                                   | IC <sub>50</sub> = 15.45 - 3.86 µM vs 15.86 - 1.17 µM cis-platin control                                                                                                                                                       | AC<br><i>Hypericum attenuatum</i> Fisch. ex Choisy, AP, EtOH | [201] |
| <b>Phloroglucinol</b> | Isouliginosin B     | Cell viability                   | <i>In vitro</i> OVCAR-3, NCI-ADR/RES, UACC-62, MCF-7, 786-0, NCI-H460, PC-3, HT29 cells                                       | <b>Decreased</b> cell proliferation (selective activity)                                                               | Mean TGI= 21.03µg/mL vs 0.88µg/mL Doxorubicine control                                                                                                                                                                         | AC<br><i>Hypericum brasiliense</i> Choisy, AP, n-Hexane      | [47]  |

| Compound Class        | Compound                              | Measurement                           | Method                                                                   | Outcome                                                | Therapeutic Application | Species, Plant Part and Extract              | Ref # |
|-----------------------|---------------------------------------|---------------------------------------|--------------------------------------------------------------------------|--------------------------------------------------------|-------------------------|----------------------------------------------|-------|
| <b>Phloroglucinol</b> | Hyperelodione D                       | Cell viability, Expression modulation | <i>In vitro</i> HeLa and HepG2 cell lines, RXR $\alpha$ expression model | <b>Decreased</b> cell viability, RXR $\alpha$ activity | AC, IM                  | <i>Hypericum elodeoides</i> Choisy, WP, EtOH | [163] |
| <b>Phloroglucinol</b> | Hyperjaponol I                        | Cell viability                        | <i>In vitro</i> HT22 cells; DPPH free radical scavenging activity model  | <b>Decreased</b> oxidative stress                      | CP                      | <i>Hypericum japonicum</i> Thunb., WP, EtOH  | [62]  |
| <b>Phloroglucinol</b> | Hyperjaponol J                        | Cell viability                        | <i>In vitro</i> HT22 cells; DPPH free radical scavenging activity model  | <b>Decreased</b> induced ferroptosis                   | CP                      | <i>Hypericum japonicum</i> Thunb., WP, EtOH  | [62]  |
| <b>Phloroglucinol</b> | Hyperjaponol K                        | Cell viability                        | <i>In vitro</i> HT22 cells; DPPH free radical scavenging activity model  | <b>Decreased</b> induced ferroptosis                   | CP                      | <i>Hypericum japonicum</i> Thunb., WP, EtOH  | [62]  |
| <b>Phloroglucinol</b> | 3-geranyl-1+(2'-ethyl)-phloroglucinol | Cell viability                        | <i>In vitro</i> HT22 cells; DPPH free radical scavenging activity model  | <b>Decreased</b> oxidative stress                      | CP                      | <i>Hypericum japonicum</i> Thunb., WP, EtOH  | [62]  |
| <b>Phloroglucinol</b> | Hyperjaponical C                      | Cell viability                        | <i>In vitro</i> HT22 cells; DPPH free radical scavenging activity model  | <b>Decreased</b> oxidative stress                      | CP                      | <i>Hypericum japonicum</i> Thunb., WP, EtOH  | [62]  |



| Compound Class | Compound        | Measurement    | Method                                                                  | Outcome   |                     | Therapeutic Application                                                   | Species, Plant Part and Extract             | Ref #                                        |       |
|----------------|-----------------|----------------|-------------------------------------------------------------------------|-----------|---------------------|---------------------------------------------------------------------------|---------------------------------------------|----------------------------------------------|-------|
| Phloroglucinol | Saroaspidin B   | Cell viability | <i>In vitro</i> HT22 cells; DPPH free radical scavenging activity model | Decreased | oxidative stress    | CP                                                                        | <i>Hypericum japonicum</i> Thunb., WP, EtOH | [62]                                         |       |
| Phloroglucinol | Saroaspidin C   | Cell viability | <i>In vitro</i> HT22 cells; DPPH free radical scavenging activity model | Decreased | induced ferroptosis | CP                                                                        | <i>Hypericum japonicum</i> Thunb., WP, EtOH | [62]                                         |       |
| Phloroglucinol | Sarothralin G   | Cell viability | <i>In vitro</i> HT22 cells; DPPH free radical scavenging activity model | Decreased | oxidative stress    | CP                                                                        | <i>Hypericum japonicum</i> Thunb., WP, EtOH | [62]                                         |       |
| Phloroglucinol | Longistylione A | PTP1B Activity | <i>In vitro</i>                                                         | Decreased | PTP1B activity      | IC <sub>50</sub> = 18.87±0.95 μM vs IC <sub>50</sub> = 2.6±0.4 μM control | Adb                                         | <i>Hypericum longistylum</i> Oliv., AP, MeOH | [202] |
| Phloroglucinol | Longistylione B | PTP1B Activity | <i>In vitro</i>                                                         | Decreased | PTP1B activity      | IC <sub>50</sub> = 16.76±0.80 μM vs IC <sub>50</sub> = 2.6±0.4 μM control | Adb                                         | <i>Hypericum longistylum</i> Oliv., AP, MeOH | [202] |
| Phloroglucinol | Longistylione C | PTP1B Activity | <i>In vitro</i>                                                         | Decreased | PTP1B activity      | IC <sub>50</sub> = 24.56±1.28 μM vs IC <sub>50</sub> = 2.6±0.4 μM control | Adb                                         | <i>Hypericum longistylum</i> Oliv., AP, MeOH | [202] |

| Compound Class        | Compound                         | Measurement    | Method                                     |                                                      | Outcome                                                                      | Therapeutic Application | Species, Plant Part and Extract              | Ref # |
|-----------------------|----------------------------------|----------------|--------------------------------------------|------------------------------------------------------|------------------------------------------------------------------------------|-------------------------|----------------------------------------------|-------|
| <b>Phloroglucinol</b> | Longistylione D                  | PTP1B Activity | <i>In vitro</i>                            | <b>Decreased</b> PTP1B activity                      | IC <sub>50</sub> = 15.96±0.81 µM vs<br>IC <sub>50</sub> = 2.6±0.4 µM control | ADb                     | <i>Hypericum longistylum</i> Oliv., AP, MeOH | [202] |
| <b>Phloroglucinol</b> | hyperpolyphyllirin /hyperibine J | Cell viability | <i>In vitro</i> K-562, SKW-3, BV-173 cells | <b>Decreased</b> cell viability (selective activity) | IC <sub>50</sub> = 21.3±1.4 - 5.3±1.5 µM                                     | AC                      | <i>Hypericum maculatum</i> Crantz, AP, DCM   | [203] |
| <b>Phloroglucinol</b> | Methoxyhyperpolyphyllirin        | Cell viability | <i>In vitro</i> K-562, SKW-3, BV-173 cells | <b>Decreased</b> cell viability (selective activity) | IC <sub>50</sub> = 23.5±3.5 - 4.7±1.0 µM                                     | AC                      | <i>Hypericum maculatum</i> Crantz, AP, DCM   | [203] |
| <b>Phloroglucinol</b> | Methoxyhyperibine J              | Cell viability | <i>In vitro</i> K-562, SKW-3, BV-173 cells | <b>Decreased</b> cell viability (selective activity) | IC <sub>50</sub> = 68.8±2.0 - 17.8±8.1 µM                                    | AC                      | <i>Hypericum maculatum</i> Crantz, AP, DCM   | [203] |
| <b>Phloroglucinol</b> | Maculatoquione A                 | Cell viability | <i>In vitro</i> K-562, SKW-3, BV-173 cells | <b>Decreased</b> cell viability (selective activity) | IC <sub>50</sub> = 77.05±5.4 - 17.9±5.3 µM                                   | AC                      | <i>Hypericum maculatum</i> Crantz, AP, DCM   | [203] |
| <b>Phloroglucinol</b> | Maculatoquione B                 | Cell viability | <i>In vitro</i> K-562, SKW-3, BV-173 cells | <b>Decreased</b> cell viability (selective activity) | IC <sub>50</sub> = 30.1±4.2 - 12.3±1.6 µM                                    | AC                      | <i>Hypericum maculatum</i> Crantz, AP, DCM   | [203] |
| <b>Phloroglucinol</b> | Maculatoquione C                 | Cell viability | <i>In vitro</i> K-562, SKW-3, BV-173 cells | <b>Decreased</b> cell viability (selective activity) | IC <sub>50</sub> = 35.9±2.8 - 16.0±1.6 µM                                    | AC                      | <i>Hypericum maculatum</i> Crantz, AP, DCM   | [203] |

| Compound Class        | Compound            | Measurement                      | Method                                                                                                                        | Outcome                                                                                                                   |                                                                                                                                                                                                                                                   | Therapeutic Application | Species, Plant Part and Extract                              | Ref # |
|-----------------------|---------------------|----------------------------------|-------------------------------------------------------------------------------------------------------------------------------|---------------------------------------------------------------------------------------------------------------------------|---------------------------------------------------------------------------------------------------------------------------------------------------------------------------------------------------------------------------------------------------|-------------------------|--------------------------------------------------------------|-------|
| <b>Phloroglucinol</b> | Maculatoquione D    | Cell viability                   | <i>In vitro</i> K-562, SKW-3, BV-173 cells                                                                                    | <b>Decreased</b> cell viability (selective activity)                                                                      | IC <sub>50</sub> = 28.1±4.0 - 16.7±2.0 µM                                                                                                                                                                                                         | AC                      | <i>Hypericum maculatum</i> Crantz, AP, DCM                   | [203] |
| <b>Phloroglucinol</b> | Erectquione A       | Cell viability                   | <i>In vitro</i> K-562, SKW-3, BV-173 cells                                                                                    | <b>Decreased</b> cell viability (selective activity)                                                                      | IC <sub>50</sub> = 46.3±3.6 - 22.4±2.0 µM                                                                                                                                                                                                         | AC                      | <i>Hypericum maculatum</i> Crantz, AP, DCM                   | [203] |
| <b>Phloroglucinol</b> | Hyperinakin         | Cell viability                   | <i>In vitro</i> RAW264.7 cells                                                                                                | <b>Increased</b> cell viability<br><b>Decreased</b> NO production                                                         | IC <sub>50</sub> =20µM vs IC <sub>50</sub> =10µM Rapamycin control                                                                                                                                                                                | AI                      | <i>Hypericum nakamurai</i> (Masam.) N.Robson, L, S, DCM/EtOH | [204] |
| <b>Phloroglucinol</b> | Revolutin           | Oxidative stress, Aortic tension | <i>Ex vivo</i> aortic model, <i>in vitro</i> ROS scavenging model                                                             | <b>Decreased</b> induced vasoconstriction<br><b>Increased</b> NO production                                               | <b>Decreased</b> aortic tension                                                                                                                                                                                                                   | Vd                      | <i>Hypericum revolutum</i> Vahl, AP, MeOH (Chl f)            | [205] |
| <b>Phloroglucinol</b> | Hyperforatin F      | Cell viability, Oxidative stress | <i>In vitro</i> A375, MDA-MB-231, SiHa, SHSY-5Y cancer cell lines; LPS stimulated RAW264,7, THP-1 and BV-2 inflammatory model | <b>Decreased</b> cell viability (selective cytotoxicity)<br><b>Decreased</b> oxidative stress induced inflammatory damage | IC <sub>50</sub> = 65.92 ± 0.80 - 7.52 ± 0.24 µM vs IC <sub>50</sub> =15.74 ± 0.13 - 5.14 ± 0.16 µM<br>Cisplatin control<br>IC <sub>50</sub> = 18.05±0.46 - 13.05±0.42 µM vs IC <sub>50</sub> =19.37±0.72 - 15.20±1.10 µM<br>Indomethacin control | AC<br>AI                | <i>Hypericum sampsonii</i> Hance, WP, EtOH                   | [136] |
| <b>Phloroglucinol</b> | Isoaustrobrasilol B | Protozoal susceptibility         | <i>In vitro</i> <i>Trichomonas vaginalis</i>                                                                                  | <b>Decreased</b> Trophozoites viability                                                                                   | <b>Decreased</b> parasitic modulation of human immune response                                                                                                                                                                                    | AP                      | <i>Hypericum</i> spp., AP, n-Hexane                          | [206] |

| Compound Class                   | Compound         | Measurement                      | Method                                                                                                          | Outcome                                                                                                                                 |                                                                                                                                                                                                                                                                  | Therapeutic Application | Species, Plant Part and Extract            | Ref # |
|----------------------------------|------------------|----------------------------------|-----------------------------------------------------------------------------------------------------------------|-----------------------------------------------------------------------------------------------------------------------------------------|------------------------------------------------------------------------------------------------------------------------------------------------------------------------------------------------------------------------------------------------------------------|-------------------------|--------------------------------------------|-------|
| <b>Phloroglucinol</b>            | (-)-erectumol I  | Cell viability                   | <i>In vitro</i> HeLa cells                                                                                      | <b>Increased</b> apoptosis (selective cytotoxicity)<br><b>Decreased</b> Hsp 105 expression                                              |                                                                                                                                                                                                                                                                  | AC                      | <i>Hypericum erectum</i> Thunb., WP, MeOH  | [207] |
| <b>Phloroglucinol</b>            | (-)-erectumol II | Cell viability                   | <i>In vitro</i> HeLa cells                                                                                      | <b>Increased</b> apoptosis (selective cytotoxicity)<br><b>Decreased</b> Hsp 105 expression                                              |                                                                                                                                                                                                                                                                  | AC                      | <i>Hypericum erectum</i> Thunb., WP, MeOH  | [207] |
| <b>Phloroglucinol derivative</b> | Sampsonione J    | Cell viability, Oxidative stress | <i>In vitro</i> RAW264.7 cells                                                                                  | <b>Decreased</b> oxidative stress induced inflammatory damage                                                                           | <b>Decreased</b> NO production<br>$IC_{50} \leq 40.32 \mu M$                                                                                                                                                                                                     | CP<br>AI                | <i>Hypericum sampsonii</i> Hance, AP, MeOH | [157] |
| <b>Phloroglucinol derivative</b> | Otogirin A       | Cell viability, Oxidative stress | <i>In vitro</i> RAW264.7 cells                                                                                  | <b>Decreased</b> oxidative stress induced inflammatory damage                                                                           | <b>Decreased</b> NO production, TNF- $\alpha$ production, iNOS expression, MAPK/JNK and I $\kappa$ B $\alpha$ phosphorylation<br><b>Increased</b> arginase 1 and KLF4 expression<br>$IC_{50} \leq 40.32 \mu M$                                                   | CP<br>AI                | <i>Hypericum sampsonii</i> Hance, AP, MeOH | [157] |
| <b>Pyranoxanthones</b>           | Jacarelhypenol A | Cell viability, Tumour growth    | <i>In vitro</i> MBA-MB-231, T47D, LOVO, A549, HepG2, K562, HL-60, THP-1 cells<br><i>In vivo</i> mouse xenograph | <b>Decreased</b> cell viability (selective cytotoxicity)<br><b>Increased</b> apoptosis<br><b>Decreased</b> tumour growth <i>in vivo</i> | Cytotoxicity $IC_{50}$ = $33.24 \pm 2.1 - 6.52 \pm 0.36 \mu M$ vs $IC_{50}$ = $0.68 \pm 0.02 - 0.11 \pm 0.01 \mu M$ Doxorubicin control<br><b>Decreased</b> Bcl-XL, Bcl-2, and Mcl-1 activity;<br><b>Increased</b> cleaved Casp-9, cleaved Casp-3, cleaved PARP; | AC                      | <i>Hypericum japonicum</i> Thunb., -, -    | [208] |

| Compound Class            | Compound                                | Measurement                      | Method                                                            |                                                                             | Outcome                                                                                        | Therapeutic Application | Species, Plant Part and Extract                               | Ref # |
|---------------------------|-----------------------------------------|----------------------------------|-------------------------------------------------------------------|-----------------------------------------------------------------------------|------------------------------------------------------------------------------------------------|-------------------------|---------------------------------------------------------------|-------|
| <b>Sterol</b>             | 4,4-dimethyl cholesterol                | Lipoxygenase activity            | <i>In vitro</i>                                                   | <b>Decreased</b> Lipoxygenase activity                                      | IC <sub>50</sub> = 68.5 ± 0.10 µM vs<br>IC <sub>50</sub> = 22.0 ± 0.04 µM<br>Baicalein control | AI                      | <i>Hypericum oblongifolium</i><br>Choisy, WP,<br>MeOH (Chl f) | [167] |
| <b>Sterol</b>             | Erectasteroid D                         | Lipoxygenase activity            | <i>In vitro</i>                                                   | <b>Decreased</b> Lipoxygenase activity                                      | IC <sub>50</sub> = 31.0 ± 0.10 µM vs<br>IC <sub>50</sub> = 22.0 ± 0.04 µM<br>Baicalein control | AI                      | <i>Hypericum oblongifolium</i><br>Choisy, WP,<br>MeOH (Chl f) | [167] |
| <b>Sterol</b>             | β-sitosterol-3-O-β-D-glucopyranoside    | Lipoxygenase activity            | <i>In vitro</i>                                                   | <b>Decreased</b> Lipoxygenase activity                                      | IC <sub>50</sub> = 39.3 ± 0.10 µM vs<br>IC <sub>50</sub> = 22.0 ± 0.04 µM<br>Baicalein control | AI                      | <i>Hypericum oblongifolium</i><br>Choisy, WP,<br>MeOH (Chl f) | [167] |
| <b>Stigmastane sterol</b> | β-sitosterol                            | Oxidative stress, Aortic tension | <i>Ex vivo</i> aortic model, <i>in vitro</i> ROS scavenging model | <b>Decreased</b> induced vasoconstriction<br><b>Increased</b> NO production | <b>Decreased</b> aortic tension                                                                | Vd                      | <i>Hypericum revolutum</i><br>Vahl, AP,<br>MeOH (Chl f)       | [205] |
| <b>Terpene</b>            | Hypatulin A                             | Bacterial susceptibility         | <i>In vitro</i> <i>Bacillus subtilis</i>                          | Active against <i>B. subtilis</i>                                           | MIC=16 µg/mL                                                                                   | AM                      | <i>Hypericum patulum</i><br>Thunb., L,<br>MeOH                | [209] |
| <b>Terpene</b>            | Dihydrovomifoliol-O-b-D-glucopyranoside | Cell viability, oxidative stress | <i>In vitro</i> BV-2 cell lines                                   | <b>Decreased</b> LPS induced NO production                                  | IC <sub>50</sub> = 1.28±0.15 µM vs<br>IC <sub>50</sub> =4.00±0.23µM<br>Quercetin control       | CP                      | <i>Hypericum przewalskii</i><br>Maxim., AP,<br>MeOH           | [154] |
| <b>Terpene</b>            | Hyperevolutin C                         | Oxidative stress, Aortic tension | <i>Ex vivo</i> aortic model, <i>in vitro</i> ROS scavenging model | <b>Decreased</b> induced vasoconstriction<br><b>Increased</b> NO production | <b>Decreased</b> aortic tension                                                                | Vd                      | <i>Hypericum revolutum</i><br>Vahl, AP,<br>MeOH (Chl f)       | [205] |

| Compound Class            | Compound             | Measurement    | Method                                                      | Outcome                                                                   | Therapeutic Application | Species, Plant Part and Extract             | Ref # |
|---------------------------|----------------------|----------------|-------------------------------------------------------------|---------------------------------------------------------------------------|-------------------------|---------------------------------------------|-------|
| <b>Terpene derivative</b> | Hyperterpenoid A     | Cell viability | <i>In vitro</i> SK-N-SH cells                               | <b>Increased</b> cell viability<br><b>Decreased</b> induced cell toxicity | CP                      | <i>Hypericum beanii</i> N. Robson, AP, MeOH | [129] |
| <b>Terpene derivative</b> | Hyperterpenoid B     | Cell viability | <i>In vitro</i> SK-N-SH cells                               | <b>Increased</b> cell viability<br><b>Decreased</b> induced cell toxicity | CP                      | <i>Hypericum beanii</i> N. Robson, AP, MeOH | [129] |
| <b>Terpene derivative</b> | Hyperdioxane A       | Cell viability | <i>In vitro</i> MT-4 cells HIV model                        | <b>Decreased</b> HIV activity                                             | AV                      | <i>Hypericum ascyron</i> L., R, MeOH        | [210] |
| <b>Terpene derivative</b> | Hyperdioxane B       | Cell viability | <i>In vitro</i> LPS-stimulated microglial cells             | <b>Decreased</b> IL-1 $\beta$ production                                  | CP                      | <i>Hypericum ascyron</i> L., R, MeOH        | [210] |
| <b>Triterpene</b>         | Acetyloleanolic acid | Cell viability | <i>In vitro</i> HL-60, SMMC-7721, A-549, MCF-7, SW480 cells | <b>Decreased</b> cell viability (selective cytotoxicity)                  | AC                      | <i>Hypericum androsaemum</i> L., AP, MeOH   | [211] |

| Compound Class    | Compound                              | Measurement                                      | Method                                                                         | Outcome                                                                                                                                     | Therapeutic Application                                                                                                                                                                                                                                                            | Species, Plant Part and Extract                               | Ref # |
|-------------------|---------------------------------------|--------------------------------------------------|--------------------------------------------------------------------------------|---------------------------------------------------------------------------------------------------------------------------------------------|------------------------------------------------------------------------------------------------------------------------------------------------------------------------------------------------------------------------------------------------------------------------------------|---------------------------------------------------------------|-------|
| <b>Triterpene</b> | Betulinic acid                        | HIV-1 reverse transcriptase associated functions | <i>In vitro</i><br>Vero-76, A549, HepG2, HeLa, TZM-bl, T-lymphoid Jurkat cells | <b>Decreased</b> viral RNase H and RDDP activity (normal and mutants)<br><b>Decreased</b> HIV-1 infected cells viability, HIV-1 replication | RNase H<br>IC <sub>50</sub> =2.0±0.2µM vs<br>IC <sub>50</sub> =8.1±2.2µM<br>RDS1643 control vs<br>IC <sub>50</sub> =12±3µM K-49 control<br>RDDP IC <sub>50</sub> =0.5±0.1µM vs<br>IC <sub>50</sub> =0.013±0.004µM<br>Efavirenz control vs<br>IC <sub>50</sub> =11±2µM K-49 control | AV<br><i>Hypericum hircinum</i> L., AP, EtOH                  | [166] |
| <b>Triterpene</b> | Betulinic acid                        | Protozoal susceptibility                         | <i>In vitro</i><br><i>Plasmodium falciparum</i>                                | Active against all tested strains                                                                                                           | IC <sub>50</sub> =5.60±0.13µg/mL -<br>4.50±1.35µg/mL vs<br>IC <sub>50</sub> =0.27±0.04µg/mL -<br>0.14±0.05µg/mL<br>quinine control                                                                                                                                                 | Mal<br><i>Hypericum lanceolatum</i> Lam., Sb, MeOH            | [153] |
| <b>Triterpene</b> | 3-oxo-20(30)-taraxastene-28,13β-olide | Lipoxygenase activity                            | <i>In vitro</i>                                                                | <b>Decreased</b> Lipoxygenase activity                                                                                                      | IC <sub>50</sub> = 48.7 ± 0.10 µM vs<br>IC <sub>50</sub> = 22.0 ± 0.04 µM<br>Baicalein control                                                                                                                                                                                     | AI<br><i>Hypericum oblongifolium</i> Choisy, WP, MeOH (Chl f) | [167] |
| <b>Triterpene</b> | Lupeol                                | Lipoxygenase activity                            | <i>In vitro</i>                                                                | <b>Decreased</b> Lipoxygenase activity                                                                                                      | IC <sub>50</sub> = 61.5 ± 0.10 µM vs<br>IC <sub>50</sub> = 22.0 ± 0.04 µM<br>Baicalein control                                                                                                                                                                                     | AI<br><i>Hypericum oblongifolium</i> Choisy, WP, MeOH (Chl f) | [167] |
| <b>Triterpene</b> | Taraxerol                             | Lipoxygenase activity                            | <i>In vitro</i>                                                                | <b>Decreased</b> Lipoxygenase activity                                                                                                      | IC <sub>50</sub> = 83.0 ± 0.10 µM vs<br>IC <sub>50</sub> = 22.0 ± 0.04 µM<br>Baicalein control                                                                                                                                                                                     | AI<br><i>Hypericum oblongifolium</i> Choisy, WP, MeOH (Chl f) | [167] |

| Compound Class    | Compound         | Measurement           | Method                                                                                                                                                                                                        |                                                                                                                           | Outcome                                                                                                                        | Therapeutic Application | Species, Plant Part and Extract                                   | Ref # |
|-------------------|------------------|-----------------------|---------------------------------------------------------------------------------------------------------------------------------------------------------------------------------------------------------------|---------------------------------------------------------------------------------------------------------------------------|--------------------------------------------------------------------------------------------------------------------------------|-------------------------|-------------------------------------------------------------------|-------|
| <b>Triterpene</b> | Oleanolic acid   | Lipoxygenase activity | <i>In vitro</i>                                                                                                                                                                                               | <b>Decreased</b> Lipoxygenase activity                                                                                    | IC <sub>50</sub> = 68.5 ± 0.10 µM vs<br>IC <sub>50</sub> = 22.0 ± 0.04 µM<br>Baicalein control                                 | AI                      | <i>Hypericum oblongifolium</i><br>Choisy, WP,<br>MeOH (Chl f)     | [167] |
| <b>Triterpene</b> | Trichadonic acid | Cell viability        | <i>In vitro</i> CCRF-CEM,<br>CEM/ADR5000,<br>U87.MG,<br>U87.MGΔEGFR,<br>HCT116(p53 <sup>+/+</sup> ),<br>HCT116(p53 <sup>-/-</sup> ),<br>MDA-MB-231-<br>pcDNA3 and<br>MDA-MB-231-<br>BCRP cancer cell<br>lines | <b>Increased</b> apoptosis, ROS formation, caspase activation<br><b>Decreased</b> cell viability (selective cytotoxicity) | IC <sub>50</sub> = 47.34±0.81 -<br>14.44±0.53 µM vs<br>IC <sub>50</sub> =122.96±10.94 -<br>0.02±0.00 µM<br>Doxorubicin control | AC                      | <i>Hypericum roeperianum</i><br>Schimp. ex<br>A.Rich., B,<br>MeOH | [212] |
| <b>Triterpene</b> | Triterhyper A    | Cell proliferation    | <i>Ex vivo</i> murine splenocytes model                                                                                                                                                                       | <b>Decreased</b> anti-CD3/anti-CD28 and LPS induced cell proliferation                                                    |                                                                                                                                |                         | <i>Hypericum longistylum</i><br>Oliv., AP, EtOH                   | [213] |



| Compound Class     | Compound                              | Measurement        | Method                                                      | Outcome                                                                   |                                                                                                                                                             | Therapeutic Application | Species, Plant Part and Extract              | Ref # |
|--------------------|---------------------------------------|--------------------|-------------------------------------------------------------|---------------------------------------------------------------------------|-------------------------------------------------------------------------------------------------------------------------------------------------------------|-------------------------|----------------------------------------------|-------|
| <b>Triterpene</b>  | Betulin 3-acetate                     | Cell proliferation | <i>Ex vivo</i> murine splenocytes model                     | <b>Decreased</b> anti-CD3/anti-CD28 and LPS induced cell proliferation    |                                                                                                                                                             | IM                      | <i>Hypericum longistylum</i> Oliv., AP, EtOH | [213] |
| <b>Triterpene</b>  | Lupeol                                | Cell proliferation | <i>Ex vivo</i> murine splenocytes model                     | <b>Decreased</b> anti-CD3/anti-CD28 and LPS induced cell proliferation    |                                                                                                                                                             | IM                      | <i>Hypericum longistylum</i> Oliv., AP, EtOH | [213] |
| <b>Unspecified</b> | p27SJ/p38SJ                           | Oxidative stress   | <i>In vitro</i> Human primary cortical neurons              | <b>Decreased</b> Tat induced oxidative stress, mitochondrial permeability | <b>Increased</b> Cdk5 and MAPK hyperphosphorylation<br><b>Decreased</b> Tat induced MEF2 hyperphosphorylation                                               | CP                      | <i>Hypericum</i> spp., -, -                  | [214] |
| <b>Unspecified</b> | 1,4-O-diferuloylsecoisol ariciresinol | Cell viability     | <i>In vitro</i> HL-60, SMMC-7721, A-549, MCF-7, SW480 cells | <b>Decreased</b> cell viability (selective cytotoxicity)                  | IC <sub>50</sub> = 15.3±1.1µM - 4.5±0.1µM vs IC <sub>50</sub> = 15.1±2.9µM - 1.1±0.1µM cisplatin control vs IC <sub>50</sub> = <0.008 µM paclitaxel control | AC                      | <i>Hypericum androsaemum</i> L., AP, MeOH    | [211] |

| Compound Class | Compound                                                                        | Measurement                      | Method                                            |                                                                 | Outcome                                                                                                                                                                                                                      | Therapeutic Application | Species, Plant Part and Extract                  | Ref # |
|----------------|---------------------------------------------------------------------------------|----------------------------------|---------------------------------------------------|-----------------------------------------------------------------|------------------------------------------------------------------------------------------------------------------------------------------------------------------------------------------------------------------------------|-------------------------|--------------------------------------------------|-------|
| Unspecified    | Tenuiside A                                                                     | Cell viability, Oxidative stress | <i>In vitro</i> PC12, BV-2 cells                  | Increased cell viability<br>Decreased NO LPS induced production | Cell viability: 52.09 - 85.12% vs 64.92 - 89.34 % captopril control<br>IC <sub>50</sub> = 1.39 ± 0.03 µM vs IC <sub>50</sub> = 1.07 ± 0.04 µM<br>Quercetin control vs IC <sub>50</sub> = 2.6 ± 0.06 µM<br>Fluoxetine control | AI                      | <i>Hypericum elatoides</i><br>R.Keller, AP, MeOH | [164] |
| Unspecified    | (Z)-3-hexenyl-β-D-glucopyranoside 18                                            | Cell viability, Oxidative stress | <i>In vitro</i> PC12, BV-2 cells                  | Decreased NO LPS induced production                             | IC <sub>50</sub> = 2.95 ± 0.07 µM vs IC <sub>50</sub> = 1.07 ± 0.04 µM<br>Quercetin control vs IC <sub>50</sub> = 2.6 ± 0.06 µM<br>Fluoxetine control                                                                        | AI                      | <i>Hypericum elatoides</i><br>R.Keller, AP, MeOH | [164] |
| Unspecified    | 4,6-dihydroxy-2-methoxyphenyl-1-O-β-D-glucopyranoside                           | Bacterial susceptibility         | <i>In vitro</i> <i>Helicobacter pylori</i>        | Antimicrobial activity against all tested strains               | MIC = 58.2µg/mL - 7.3µg/mL vs MIC = 0.042µg/mL - 0.037µg/mL<br>Clarithromycin control vs MIC = 0.18µg/mL - 0.002µg/mL Amoxicillin control                                                                                    | AM                      | <i>Hypericum erectum</i><br>Thunb., WP, MeOH     | [215] |
| Unspecified    | 4-hydroxy-2,6-dimethoxyphenyl-1-O-α-L-rhamnopyranosyl (1-6)-β-D-glucopyranoside | Bacterial susceptibility         | <i>In vitro</i> <i>Helicobacter pylori</i>        | Selective antimicrobial activity                                | MIC= 27.3µg/mL vs MIC=0.037µg/mL<br>Clarithromycin control vs MIC=0.18µg/mL<br>Amoxicillin control                                                                                                                           | AM                      | <i>Hypericum erectum</i><br>Thunb., WP, MeOH     | [215] |
| Unspecified    | (+) Japonone A                                                                  | Viral susceptibility             | <i>In vitro</i> iSLK.219 rKSHV.219-infected cells | Active against Kaposi's sarcoma associated herpesvirus          | EC <sub>50</sub> =166.00 µM; Selectivity index higher than 3.01                                                                                                                                                              | AV                      | <i>Hypericum japonicum</i><br>Thunb., AP, EtOH   | [216] |

| Compound Class | Compound                                                | Measurement              | Method                                                    |                                                                                             | Outcome                                                                                                                      | Therapeutic Application | Species, Plant Part and Extract                                 | Ref # |
|----------------|---------------------------------------------------------|--------------------------|-----------------------------------------------------------|---------------------------------------------------------------------------------------------|------------------------------------------------------------------------------------------------------------------------------|-------------------------|-----------------------------------------------------------------|-------|
| Unspecified    | HLT0<br>UNIDENTIFIED                                    | Protozoal susceptibility | <i>In vitro</i><br><i>Plasmodium falciparum</i>           | Active against all tested strains                                                           | IC <sub>50</sub> =5.89±0.20µg/mL - 4.26±0.15µg/mL vs<br>IC <sub>50</sub> =0.27±0.04µg/mL - 0.14±0.05µg/mL<br>quinine control | Mal                     | <i>Hypericum lanceolatum</i><br>Lam., Sb,<br>MeOH               | [153] |
| Unspecified    | 4,4-dimethylergosta-8,14,24(28)-triene-3β,12β,17α-triol | Lipoxygenase activity    | <i>In vitro</i>                                           | Decreased Lipoxygenase activity                                                             | IC <sub>50</sub> = 71.0 ± 0.10 µM vs<br>IC <sub>50</sub> = 22.0 ± 0.04 µM<br>Baicalein control                               | AI                      | <i>Hypericum oblongifolium</i><br>Choisy, WP,<br>MeOH (Chl f)   | [167] |
| Unspecified    | Unnamed compound                                        | Antimicrobial activity   | <i>In vitro</i>                                           | Unidentified compound                                                                       | Unidentified compound                                                                                                        | AM                      | <i>Hypericum olympicum</i> L.<br>cf. uniflorum,<br>AP, n-Hexane | [217] |
| Unspecified    | Eleocharin A                                            | NO production            | <i>In vitro</i> DLD-1 cells, RAW264.4 cells, IMR-32 cells | Decreased NO production<br>Decreased DLD-1 cell viability<br>Decreased IMR-1 cell viability | IC <sub>50</sub> = 10.52µM<br><br>IC <sub>50</sub> = 5.98µM<br><br>IC <sub>50</sub> = 4.79µM                                 | AC, CP                  | <i>Hypericum nokoense</i><br>Ohwi, AP,<br>MeOH                  | [168] |
| Xanthone       | Ananixanthone                                           | Cell viability           | <i>In vitro</i> HUVEC cells                               | Decreased induced cell damage                                                               |                                                                                                                              | CP                      | <i>Hypericum acmosepalum</i><br>N.Robson, AP,<br>EtOH           | [218] |
| Xanthone       | Osajaxanthone                                           | Cell viability           | <i>In vitro</i> HUVEC cells                               | Decreased induced cell damage                                                               |                                                                                                                              | CP                      | <i>Hypericum acmosepalum</i><br>N.Robson, AP,<br>EtOH           | [218] |

| Compound Class  | Compound                                           | Measurement                                          | Method                           |                                                                                                         | Outcome                                                                                                                                                                                                                      | Therapeutic Application | Species, Plant Part and Extract                  | Ref # |
|-----------------|----------------------------------------------------|------------------------------------------------------|----------------------------------|---------------------------------------------------------------------------------------------------------|------------------------------------------------------------------------------------------------------------------------------------------------------------------------------------------------------------------------------|-------------------------|--------------------------------------------------|-------|
| <b>Xanthone</b> | Mangiferin                                         | Stress-induced depressive behaviours<br>MAO activity | <i>In vivo</i> mouse model       | <b>Decreased</b>                                                                                        | immobility time in FST<br><br>FST time of immobility: 159.5±18.2 - 80.5±42.4 (single dose dependent) vs 108±17.2 Imipramine control<br><b>Decreased</b> MAO activity                                                         | AD                      | <i>Hypericum aucheri</i> Jaub. & Spach, AP, EtOH | [219] |
| <b>Xanthone</b> | Hyperelatone G                                     | Cell viability, Oxidative stress                     | <i>In vitro</i> PC12, BV-2 cells | <b>Increased</b> cell viability<br><b>Decreased</b> NO LPS induced production                           | Cell viability: 50.72 - 80.20% vs 64.92 - 89.34 % captopril control<br>IC <sub>50</sub> = 3.84 ± 0.15 µM vs IC <sub>50</sub> = 1.07 ± 0.04 µM<br>Quercetin control vs IC <sub>50</sub> = 2.6 ± 0.06 µM<br>Fluoxetine control | AI                      | <i>Hypericum elatoides</i> R.Keller, AP, MeOH    | [164] |
| <b>Xanthone</b> | Hyperelatone H                                     | Cell viability, Oxidative stress                     | <i>In vitro</i> PC12, BV-2 cells | <b>Increased</b> cell viability<br><b>Decreased</b> NO LPS induced production                           | Cell viability: 63.17 - 90.08% vs 64.92 - 89.34 % captopril control<br>IC <sub>50</sub> = 0.75 ± 0.02 µM vs IC <sub>50</sub> = 1.07 ± 0.04 µM<br>Quercetin control vs IC <sub>50</sub> = 2.6 ± 0.06 µM<br>Fluoxetine control | AI                      | <i>Hypericum elatoides</i> R.Keller, AP, MeOH    | [164] |
| <b>Xanthone</b> | 1,3,6-trihydroxy-7-O-(3-methylbut-2-enyl) xanthone | RXRα transcription<br>Cell viability                 | <i>In vitro</i> 293T, HeLa cells | <b>Induced</b> apoptosis<br><b>Inhibited</b> HeLa cells proliferation (selectively), RXRα transcription | <b>Increased:</b> caspase-8 activation, PARP cleavage                                                                                                                                                                        | AC                      | <i>Hypericum elodeoides</i> Choisy, WP, EtOH     | [163] |
| <b>Xanthone</b> | Hyperfaberol A                                     | Cell viability                                       | <i>In vitro</i> ECA-109 cells    | Cytotoxicity against ECA-109                                                                            | IC <sub>50</sub> = 12.8µM vs IC <sub>50</sub> = 1.2 µM Taxol control                                                                                                                                                         | AC                      | <i>Hypericum faberi</i> R.Keller, WP, MeOH       | [52]  |

| Compound Class  | Compound                               | Measurement              | Method                                |                                   | Outcome                                                                                                                                                              | Therapeutic Application | Species, Plant Part and Extract                 | Ref # |
|-----------------|----------------------------------------|--------------------------|---------------------------------------|-----------------------------------|----------------------------------------------------------------------------------------------------------------------------------------------------------------------|-------------------------|-------------------------------------------------|-------|
| <b>Xanthone</b> | Isojacareubin                          | Bacterial susceptibility | <i>In vitro</i> MRSA                  | Active against all tested strains | MIC <sub>50</sub> =8μM vs MIC <sub>50</sub> =64μM Ampicillin control vs MIC <sub>50</sub> =512μM Ceftazidime control vs MIC <sub>50</sub> =16μM Levofloxacin control | AM                      | <i>Hypericum japonicum</i> Thunb., AP, EtOH     | [220] |
| <b>Xanthone</b> | Kellerine A                            | Cell viability           | <i>In vitro</i> HeLa cells            | <b>Decreased</b> cell viability   | IC <sub>50</sub> =2.5±0.1 μM                                                                                                                                         | AC                      | <i>Hypericum kelleri</i> Bald., AP, Cyclohexane | [221] |
| <b>Xanthone</b> | Kellerine B                            | Cell viability           | <i>In vitro</i> HeLa cells            | <b>Decreased</b> cell viability   | IC <sub>50</sub> =5.9±0.9 μM                                                                                                                                         | AC                      | <i>Hypericum kelleri</i> Bald., AP, Cyclohexane | [221] |
| <b>Xanthone</b> | 5-Hydroxy-3-methoxyxanthone            | Protozoal susceptibility | <i>In vitro Plasmodium falciparum</i> | Active against all tested strains | IC <sub>50</sub> =3.26±0.08μg/mL - 1.43±0.48μg/mL vs IC <sub>50</sub> =0.27±0.04μg/mL - 0.14±0.05μg/mL quinine control                                               | Mal                     | <i>Hypericum lanceolatum</i> Lam., Sb, MeOH     | [153] |
| <b>Xanthone</b> | 3-Hydroxy-5-methoxyxanthone            | Protozoal susceptibility | <i>In vitro Plasmodium falciparum</i> | Active against all tested strains | IC <sub>50</sub> =34.09±0.12μg/mL - 33.84±0.20μg/mL vs IC <sub>50</sub> =0.27±0.04μg/mL - 0.14±0.05μg/mL quinine control                                             | Mal                     | <i>Hypericum lanceolatum</i> Lam., Sb, MeOH     | [153] |
| <b>Xanthone</b> | 5-O-methyl-2-deprenylrheediaxanthone B | MHC inhibition           | <i>In vitro</i>                       | <b>Decreased</b> MHC expression   | Decreased MICA (24%). HLA-E (40%). HLA-DR (25%) expression vs control                                                                                                | IM                      | <i>Hypericum perforatum</i> L., R, Cyclohexane  | [222] |

| Compound Class  | Compound                    | Measurement                      | Method                                                                                                                                                                        |                                                           | Outcome                                                                                                                                    | Therapeutic Application | Species, Plant Part and Extract                                                               | Ref # |
|-----------------|-----------------------------|----------------------------------|-------------------------------------------------------------------------------------------------------------------------------------------------------------------------------|-----------------------------------------------------------|--------------------------------------------------------------------------------------------------------------------------------------------|-------------------------|-----------------------------------------------------------------------------------------------|-------|
| <b>Xanthone</b> | Biyouxanthone D             | Bacterial susceptibility         | <i>In vitro</i> <i>Cryptococcus neoformans</i> and dermatophytes                                                                                                              | Active against all tested strains                         | MIC ( <i>C. neoformans</i> )= 32-16µg/mL vs 4-1µg/mL fluconazol control<br>MIC (Dermatophytes)= 32-16µg/mL vs 16-1µg/mL fluconazol control | AF                      | <i>Hypericum perforatum</i> subsp. <i>veronense</i> (Schrank) H.Lindb, In vitro R, Chloroform | [223] |
| <b>Xanthone</b> | 2,3,4-trimethoxy xanthone   | Oxidative stress, Aortic tension | <i>Ex vivo</i> aortic model, <i>in vitro</i> ROS scavenging model                                                                                                             | <b>Decreased</b> induced vasoconstriction, ROS production | <b>Decreased</b> aortic tension, oxidative stress                                                                                          | CP                      | <i>Hypericum revolutum</i> Vahl, AP, MeOH (Chl f)                                             | [205] |
| <b>Xanthone</b> | 2-hydroxy-5-methoxyxanthone | Cell viability                   | <i>In vitro</i> CCRF-CEM, CEM/ADR5000, U87.MG, U87.MGΔEGFR, HCT116(p53 <sup>+/+</sup> ), HCT116(p53 <sup>-/-</sup> ), MDA-MB-231-pcDNA3 and MDA-MB-231-BCRP cancer cell lines | <b>Decreased</b> cell viability (selective cytotoxicity)  | IC <sub>50</sub> = >165.29 - 16.80±0.96 µM vs IC <sub>50</sub> =122.96±10.94 - 0.02±0.00 µM Doxorubicin control                            | AC                      | <i>Hypericum roeperianum</i> Schimp. ex A.Rich., B, MeOH                                      | [212] |

| Compound Class  | Compound                     | Measurement              | Method                                                                                                                                                                        |                                                          | Outcome                                                                                                             | Therapeutic Application | Species, Plant Part and Extract                          | Ref # |
|-----------------|------------------------------|--------------------------|-------------------------------------------------------------------------------------------------------------------------------------------------------------------------------|----------------------------------------------------------|---------------------------------------------------------------------------------------------------------------------|-------------------------|----------------------------------------------------------|-------|
| <b>Xanthone</b> | Norathyriol                  | Cell viability           | <i>In vitro</i> CCRF-CEM, CEM/ADR5000, U87.MG, U87.MGΔEGFR, HCT116(p53 <sup>+/+</sup> ), HCT116(p53 <sup>-/-</sup> ), MDA-MB-231-pcDNA3 and MDA-MB-231-BCRP cancer cell lines | <b>Decreased</b> cell viability (selective cytotoxicity) | IC <sub>50</sub> = >153.85 - 19.94±2.12 μM vs IC <sub>50</sub> =122.96±10.94 - 0.02±0.00 μM Doxorubicin control     | AC                      | <i>Hypericum roeperianum</i> Schimp. ex A.Rich., B, MeOH | [212] |
| <b>Xanthone</b> | 1,3,5,6-tetrahydroxyxanthone | Cell viability           | <i>In vitro</i> CCRF-CEM, CEM/ADR5000, U87.MG, U87.MGΔEGFR, HCT116(p53 <sup>+/+</sup> ), HCT116(p53 <sup>-/-</sup> ), MDA-MB-231-pcDNA3 and MDA-MB-231-BCRP cancer cell lines | <b>Decreased</b> cell viability (selective cytotoxicity) | IC <sub>50</sub> = 150.02±7.03 - 38.46±4.07 μM vs IC <sub>50</sub> =122.96±10.94 - 0.02±0.00 μM Doxorubicin control | AC                      | <i>Hypericum roeperianum</i> Schimp. ex A.Rich., B, MeOH | [212] |
| <b>Xanthone</b> | 1,4,6,7-tetrahydroxyxanthone | Bacterial susceptibility | <i>In vitro</i> <i>E. coli</i> ATCC8739, <i>K. pneumoniae</i> KP55, <i>Enterobacter cloacae</i> ATCC13048                                                                     | <b>Decreased</b> bacterial growth                        | MIC range 2 - 64 μg/mL                                                                                              | AM                      | <i>Hypericum roeperianum</i> Schimp. ex A.Rich., B, MeOH | [224] |

| Compound Class | Compound                              | Measurement                      | Method                                                                                                                        | Outcome                                                | Therapeutic Application                                                                                            | Species, Plant Part and Extract | Ref #                                             |       |
|----------------|---------------------------------------|----------------------------------|-------------------------------------------------------------------------------------------------------------------------------|--------------------------------------------------------|--------------------------------------------------------------------------------------------------------------------|---------------------------------|---------------------------------------------------|-------|
| Xanthone       | 1,5-dihydroxy-6-methoxyxanthone       | Bacterial susceptibility         | <i>In vitro</i> E. coli ATCC8739, K. pneumoniae KP55, Enterobacter cloacae ATCC13048                                          | Decreased bacterial growth                             | MIC range 8 - 128 µg/mL                                                                                            | AM                              | Hypericum roeperianum Schimp. ex A.Rich., B, MeOH | [224] |
| Xanthone       | 2-methoxy-9H-xanthen-9-one            | Cell viability, Oxidative stress | <i>In vitro</i> A375, MDA-MB-231, SiHa, SHSY-5Y cancer cell lines; LPS stimulated RAW264,7, THP-1 and BV-2 inflammatory model | Decreased oxidative stress induced inflammatory damage | IC <sub>50</sub> = 37.64±1.32 - 31.76±2.50 µM vs IC <sub>50</sub> =19.37±0.72 - 15.20±1.10 µM Indomethacin control | AI                              | Hypericum sampsonii Hance, WP, EtOH               | [136] |
| Xanthone       | 1-hydroxy-7-methoxy- 9H-xanthen-9-one | Cell viability, Oxidative stress | <i>In vitro</i> A375, MDA-MB-231, SiHa, SHSY-5Y cancer cell lines; LPS stimulated RAW264,7, THP-1 and BV-2 inflammatory model | Decreased oxidative stress induced inflammatory damage | IC <sub>50</sub> = 28.03±1.24 - 24.32±1.09 µM vs IC <sub>50</sub> =19.37±0.72 - 15.20±1.10 µM Indomethacin control | AI                              | Hypericum sampsonii Hance, WP, EtOH               | [136] |



| Compound Class | Compound                               | Measurement                      | Method                                                                                                                        | Outcome                                                                                                                | Therapeutic Application                                                                                                                                                                                                              | Species, Plant Part and Extract | Ref #                                      |       |
|----------------|----------------------------------------|----------------------------------|-------------------------------------------------------------------------------------------------------------------------------|------------------------------------------------------------------------------------------------------------------------|--------------------------------------------------------------------------------------------------------------------------------------------------------------------------------------------------------------------------------------|---------------------------------|--------------------------------------------|-------|
| Xanthone       | 1,7-dihydroxy-9H-xanthen-9-one         | Cell viability, Oxidative stress | <i>In vitro</i> A375, MDA-MB-231, SiHa, SHSY-5Y cancer cell lines; LPS stimulated RAW264,7, THP-1 and BV-2 inflammatory model | <b>Decreased</b> oxidative stress induced inflammatory damage                                                          | IC <sub>50</sub> = 35.89±0.90 - 29.07±0.87 µM vs IC <sub>50</sub> =19.37±0.72 - 15.20±1.10 µM Indomethacin control                                                                                                                   | AI                              | <i>Hypericum sampsonii</i> Hance, WP, EtOH | [136] |
| Xanthone       | 5-O-methyl-2-deprenylrheediaxanthone B | Cell viability, Oxidative stress | <i>In vitro</i> A375, MDA-MB-231, SiHa, SHSY-5Y cancer cell lines; LPS stimulated RAW264,7, THP-1 and BV-2 inflammatory model | <b>Decreased</b> cell viability (selective cytotoxicity) <b>Decreased</b> oxidative stress induced inflammatory damage | IC <sub>50</sub> = >200 - 32.20±0.63 µM vs IC <sub>50</sub> =15.74±0.13 - 5.14±0.16 µM Cisplatin control<br>IC <sub>50</sub> = 22.03±0.72 - 18.92±1.53 µM vs IC <sub>50</sub> =19.37±0.72 - 15.20±1.10 µM Indomethacin control       | AC<br>AI                        | <i>Hypericum sampsonii</i> Hance, WP, EtOH | [136] |
| Xanthone       | 5'-demethoxycadenosin G                | Cell viability, Oxidative stress | <i>In vitro</i> A375, MDA-MB-231, SiHa, SHSY-5Y cancer cell lines; LPS stimulated RAW264,7, THP-1 and BV-2 inflammatory model | <b>Decreased</b> cell viability (selective cytotoxicity) <b>Decreased</b> oxidative stress induced inflammatory damage | IC <sub>50</sub> =158.90±0.59 - 36.52±0.62 µM vs IC <sub>50</sub> =15.74±0.13 - 5.14±0.16 µM Cisplatin control<br>IC <sub>50</sub> = 30.01±0.64 - 22.32±0.73 µM vs IC <sub>50</sub> =19.37±0.72 - 15.20±1.10 µM Indomethacin control | AC<br>AI                        | <i>Hypericum sampsonii</i> Hance, WP, EtOH | [136] |

| Compound Class  | Compound                    | Measurement                      | Method                                                                                                                        | Outcome                                                                                                                | Therapeutic Application                                                                                                                                                                                                        | Species, Plant Part and Extract                        | Ref # |
|-----------------|-----------------------------|----------------------------------|-------------------------------------------------------------------------------------------------------------------------------|------------------------------------------------------------------------------------------------------------------------|--------------------------------------------------------------------------------------------------------------------------------------------------------------------------------------------------------------------------------|--------------------------------------------------------|-------|
| <b>Xanthone</b> | Jacareubin                  | Cell viability, Oxidative stress | <i>In vitro</i> A375, MDA-MB-231, SiHa, SHSY-5Y cancer cell lines; LPS stimulated RAW264,7, THP-1 and BV-2 inflammatory model | <b>Decreased</b> cell viability (selective cytotoxicity) <b>Decreased</b> oxidative stress induced inflammatory damage | IC <sub>50</sub> = >200 - 36.64±0.67 µM vs IC <sub>50</sub> =15.74±0.13 - 5.14±0.16 µM Cisplatin control<br>IC <sub>50</sub> = 26.65±1.03 - 20.71±1.58 µM vs IC <sub>50</sub> =19.37±0.72 - 15.20±1.10 µM Indomethacin control | AC<br>AI<br><i>Hypericum sampsonii</i> Hance, WP, EtOH | [136] |
| <b>Xanthone</b> | 2-hydroxy-3-methoxyxanthone | Cell viability                   | <i>In vitro</i> SMMC-7721, Huh-7, HepG2, SK-HEP-1, PLC/PRF/5, LO2 cells                                                       | Selective cytotoxicity against HepG2 and LO2                                                                           | IC <sub>50</sub> = 10.19±0.12 µM (HepG2). 14.47±0.95 µM (LO2) vs IC <sub>50</sub> =20.62±1.03 µM - 4.47±0.27 µM cisplatin control vs IC <sub>50</sub> = 0.18± 0.03 - <0.01 µM taxol control                                    | AC<br><i>Hypericum stellatum</i> N.Robson, AP, EtOH    | [225] |
| <b>Xanthone</b> | 1,3,8-trihydroxyxanthone    | Cell viability                   | <i>In vitro</i> SMMC-7721, Huh-7, HepG2, SK-HEP-1, PLC/PRF/5, LO2 cells                                                       | Selective cytotoxicity against SMMC-7721<br>Weak cytotoxicity against LO2                                              | IC <sub>50</sub> = 15.20±0.27 µM (SMMC-7721). >40 µM (LO2) vs IC <sub>50</sub> =20.62±1.03 µM - 4.47±0.27 µM cisplatin control vs IC <sub>50</sub> = 0.18± 0.03 - <0.01 µM taxol control                                       | AC<br><i>Hypericum stellatum</i> N.Robson, AP, EtOH    | [225] |
| <b>Xanthone</b> | 1,3,7-trihydroxyxanthone    | Cell viability                   | <i>In vitro</i> SMMC-7721, Huh-7, HepG2, SK-HEP-1, PLC/PRF/5, LO2 cells                                                       | Selective cytotoxicity against HepG2<br>Weak cytotoxicity against LO2                                                  | IC <sub>50</sub> = 22.60±1.43 µM (HepG2). >40 µM (LO2) vs IC <sub>50</sub> =20.62±1.03 µM - 4.47±0.27 µM cisplatin control vs IC <sub>50</sub> = 0.18± 0.03 - <0.01 µM taxol control                                           | AC<br><i>Hypericum stellatum</i> N.Robson, AP, EtOH    | [225] |

| Compound Class  | Compound                               | Measurement    | Method                                                                                 |                                                                                                                                  | Outcome                                                                                                                                                                                                       | Therapeutic Application | Species, Plant Part and Extract                         | Ref # |
|-----------------|----------------------------------------|----------------|----------------------------------------------------------------------------------------|----------------------------------------------------------------------------------------------------------------------------------|---------------------------------------------------------------------------------------------------------------------------------------------------------------------------------------------------------------|-------------------------|---------------------------------------------------------|-------|
| <b>Xanthone</b> | Isojacareubin                          | Cell viability | <i>In vitro</i><br>SMMC-7721,<br>Huh-7, HepG2,<br>SK-HEP-1,<br>PLC/PRF/5, LO2<br>cells | <b>Decreased</b> cell<br>viability (selective<br>activity)                                                                       | IC <sub>50</sub> =11.83±0.56 µM -<br>1.41±0.03 µM<br>IC <sub>50</sub> =20.62±1.03 µM -<br>4.47±0.27 µM cisplatin<br>control vs<br>IC <sub>50</sub> = 0.18± 0.03 - <0.01<br>µM taxol control                   | AC                      | <i>Hypericum<br/>stellatum</i><br>N.Robson, AP,<br>EtOH | [225] |
| <b>Xanthone</b> | 1,3,7-trihydroxy-<br>6-methoxyxanthone | Cell viability | <i>In vitro</i><br>SMMC-7721,<br>Huh-7, HepG2,<br>SK-HEP-1,<br>PLC/PRF/5, LO2<br>cells | Selective<br>cytotoxicity SMMC-<br>7721, SK-HEP-1 and<br>LO2                                                                     | IC <sub>50</sub> =37.09±0.97 µM -<br>12.09±0.14 µM<br>IC <sub>50</sub> =20.62±1.03 µM -<br>4.47±0.27 µM cisplatin<br>control vs<br>IC <sub>50</sub> = 0.18± 0.03 - <0.01<br>µM taxol control                  | AC                      | <i>Hypericum<br/>stellatum</i><br>N.Robson, AP,<br>EtOH | [225] |
| <b>Xanthone</b> | Hypxanthones A                         | Cell viability | <i>In vitro</i><br>SMMC-7721,<br>Huh-7, HepG2,<br>SK-HEP-1,<br>PLC/PRF/5, LO2<br>cells | Selective<br>cytotoxicity against<br>SMMC-7721<br>Weak cytotoxicity<br>against LO2                                               | IC <sub>50</sub> = 27.56±0.68 µM<br>(SMMC-7721). >40 µM<br>(LO2) vs<br>IC <sub>50</sub> =20.62±1.03 µM -<br>4.47±0.27 µM cisplatin<br>control vs<br>IC <sub>50</sub> = 0.18± 0.03 - <0.01<br>µM taxol control | AC                      | <i>Hypericum<br/>stellatum</i><br>N.Robson, AP,<br>EtOH | [225] |
| <b>Xanthone</b> | Hypxanthones B                         | Cell viability | <i>In vitro</i><br>SMMC-7721,<br>Huh-7, HepG2,<br>SK-HEP-1,<br>PLC/PRF/5, LO2<br>cells | Selective<br>cytotoxicity against<br>SMMC-7721, Huh-7,<br>HepG2, SK-HEP-1,<br>PLC/PRF/5, LO2<br>Weak cytotoxicity<br>against LO2 | IC <sub>50</sub> =30.76±0.38µM -<br>8.26±0.57 µM<br>IC <sub>50</sub> =20.62±1.03 µM -<br>4.47±0.27 µM cisplatin<br>control vs<br>IC <sub>50</sub> = 0.18± 0.03 - <0.01<br>µM taxol control                    | AC                      | <i>Hypericum<br/>stellatum</i><br>N.Robson, AP,<br>EtOH | [225] |

| Compound Class  | Compound           | Measurement                    | Method                                                                  |                                                                                                                  | Outcome                                                                                                                                                                              | Therapeutic Application | Species, Plant Part and Extract                  | Ref # |
|-----------------|--------------------|--------------------------------|-------------------------------------------------------------------------|------------------------------------------------------------------------------------------------------------------|--------------------------------------------------------------------------------------------------------------------------------------------------------------------------------------|-------------------------|--------------------------------------------------|-------|
| <b>Xanthone</b> | Calycinoxanthone D | Cell viability                 | <i>In vitro</i> SMMC-7721, Huh-7, HepG2, SK-HEP-1, PLC/PRF/5, LO2 cells | Selective cytotoxicity against all tested cells                                                                  | IC <sub>50</sub> =31.11±2.67μM - 6.27±0.16 μM<br>IC <sub>50</sub> =20.62±1.03 μM - 4.47±0.27 μM<br>cisplatin control vs<br>IC <sub>50</sub> = 0.18± 0.03 - <0.01 μM<br>taxol control | AC                      | <i>Hypericum stellatum</i><br>N.Robson, AP, EtOH | [225] |
| <b>Xanthone</b> | Wilsonxanthone B   | Glucose transporter 4 activity | <i>In vitro</i> L6 cell model                                           | <b>Increased</b> GLUT4 translocation                                                                             | vs insulin positive control                                                                                                                                                          | ADb                     | <i>Hypericum wilsonii</i> N. Robson, AP, EtOH    | [123] |
| <b>Xanthone</b> | Isojacareubin      | NO production                  | <i>In vitro</i> DLD-1 cells, RAW264.4 cells, IMR-32 cells               | <b>Decreased</b> NO production<br><b>Decreased</b> DLD-1 cell viability<br><b>Decreased</b> IMR-1 cell viability | IC <sub>50</sub> = 6.03μM<br>IC <sub>50</sub> = 4.16μM<br>IC <sub>50</sub> = 5.24μM                                                                                                  | AC, CP                  | <i>Hypericum nokoense</i><br>Ohwi, AP, MeOH      | [168] |
| <b>Xanthone</b> | Euxanthone         | NO production                  | <i>In vitro</i> RAW264.4 cells                                          | <b>Decreased</b> NO production                                                                                   | IC <sub>50</sub> = 7.67μM                                                                                                                                                            | CP                      | <i>Hypericum nokoense</i><br>Ohwi, AP, MeOH      | [168] |

| Compound Class            | Compound                                                                                                  | Measurement    | Method                                                                                                                                                                 | Outcome                                           | Therapeutic Application                                                                                        | Species, Plant Part and Extract | Ref #                                             |       |
|---------------------------|-----------------------------------------------------------------------------------------------------------|----------------|------------------------------------------------------------------------------------------------------------------------------------------------------------------------|---------------------------------------------------|----------------------------------------------------------------------------------------------------------------|---------------------------------|---------------------------------------------------|-------|
| Xanthone derived compound | 3'-hydroxymethyl-2'-(4''-hydroxy-3'',5''-dimethoxyphenyl)-5',6':5,6-(6,8-dihydroxyxanthone)-1',4'-dioxane | Cell viability | In vitro CCRF-CEM, CEM/ADR5000, U87.MG, U87.MGΔEGFR, HCT116(p53 <sup>+/+</sup> ), HCT116(p53 <sup>-/-</sup> ), MDA-MB-231-pcDNA3 and MDA-MB-231-BCRP cancer cell lines | Decreased cell viability (selective cytotoxicity) | IC <sub>50</sub> = >91.74 - 12.72±0.75 μM vs IC <sub>50</sub> =122.96±10.94 - 0.02±0.00 μM Doxorubicin control | AC                              | Hypericum roeperianum Schimp. ex A.Rich., B, MeOH | [212] |
| Xanthone derived compound | 3'-hydroxymethyl-2'-(4''-hydroxy-3'',5''-dimethoxyphenyl)-5',6':5,6-(xanthone)-1',4'-dioxane              | Cell viability | In vitro CCRF-CEM, CEM/ADR5000, U87.MG, U87.MGΔEGFR, HCT116(p53 <sup>+/+</sup> ), HCT116(p53 <sup>-/-</sup> ), MDA-MB-231-pcDNA3 and MDA-MB-231-BCRP cancer cell lines | Decreased cell viability (selective cytotoxicity) | IC <sub>50</sub> = >85.47 - 16.31±2.12 μM vs IC <sub>50</sub> =122.96±10.94 - 0.02±0.00 μM Doxorubicin control | AC                              | Hypericum roeperianum Schimp. ex A.Rich., B, MeOH | [212] |

| Compound Class                     | Compound                           | Measurement                          | Method                     | Outcome                                                                                                                                                                                                |                                                                                          | Therapeutic Application | Species, Plant Part and Extract                   | Ref # |
|------------------------------------|------------------------------------|--------------------------------------|----------------------------|--------------------------------------------------------------------------------------------------------------------------------------------------------------------------------------------------------|------------------------------------------------------------------------------------------|-------------------------|---------------------------------------------------|-------|
| <b>Xanthone derived compound</b>   | 1101                               | Stress-induced depressive behaviours | <i>In vivo</i> mouse model | <b>Increased</b> swimming period in mice (FST)<br><b>Decreased</b> immobility period in mice (FST)<br><b>Increased</b> activity time in mice (TST)<br><b>Decreased</b> immobility period in mice (TST) | No significant difference between tested compound and venlafaxine positive control       | AD                      | <i>Hypericum</i> spp., -, -                       | [226] |
| <b>Xanthone derived compound</b>   | 1105                               | Stress-induced depressive behaviours | <i>In vivo</i> mouse model | <b>Increased</b> swimming period in mice (FST)<br><b>Decreased</b> immobility period in mice (FST)<br><b>Increased</b> activity time in mice (TST)<br><b>Decreased</b> immobility period in mice (TST) | No significant difference between tested compound and venlafaxine positive control       | AD                      | <i>Hypericum</i> spp., -, -                       | [226] |
| <b><math>\beta</math>-diketone</b> | 2,6,9-trimethyl-8-decene-3,5-dione | Acetylcholinesterase activity        | <i>In vitro</i>            | <b>Decreased</b> AChE activity                                                                                                                                                                         | IC <sub>50</sub> = 1.51 $\mu$ M vs IC <sub>50</sub> = 0.13 $\mu$ M Physostigmine control | AD                      | <i>Hypericum perforatum</i> L., AP, Diethyl ether | [227] |

Table S1. Abbreviations: AP – aerial part; R – roots; S – stems; L – leaves; B – bark; Fl – flowers; Fr – fruits; Sb – stem bark; Tw – twigs; WP – whole plant; SH – skin healing; CP – cell protection; AC – anticancer; AP – antiparasitic; AD – antidepressant; AM – antimicrobial; AV – antiviral; ADb – antidiabetic; AI – anti-inflammatory; Ad.In – Adipogenesis inhibition; IM – immunomodulatory; Alz – Alzheimer; Mal – malaria; Cosm – cosmetic; AF – antifungal; AN – analgesia; Vd – vasodilation; AEp – anti epilepsy; PDT – photodynamic therapy; Int – interactions; Sp.At – spinocerebellar ataxia; EtOH – ethanol; MeOH – methanol; DCM – dichloromethane; AChE - acetylcholinesterase
